# Supplementary material for: New Bioactive β-Resorcylic Acid Derivatives from the Alga-Derived Fungus Penicillium antarcticum KMM 4685
Source: MDPI journal article supplement (doi:10.3390/md21030178), 2023-03-14

## New Bioactive $\beta$ -Resorcylic Acid Derivatives from the Alga-Derived Fungus *Penicillium antarcticum* KMM 4685

Elena V. Leshchenko <sup>1,2,\*</sup>, Alexandr S. Antonov <sup>1</sup>, Gleb V. Borkunov <sup>1,2</sup>, Jessica Hauschild <sup>3,4</sup>, Olesya I. Zhuravleva <sup>1,2</sup>, Yuliya V. Khudyakova <sup>1</sup>, Alexander S. Menshov <sup>1</sup>, Roman S. Popov <sup>1</sup>, Natalya Yu. Kim <sup>1</sup>, Markus Graefen <sup>4</sup>, Carsten Bokemeyer <sup>3</sup>, Gunhild von Amsberg <sup>3,4</sup>, Anton N. Yurchenko <sup>1</sup> and Sergey A. Dyshlovoy <sup>3,4,\*</sup>

<sup>1</sup> G.B. Elyakov Institute of Bioorganic Chemistry, Far Eastern Branch of the Russian Academy of Sciences, 159 Prospect 100-letiya Vladivostoka, Vladivostok 690022, Russia

<sup>2</sup> Institute of High Technologies and Advanced Materials, Far Eastern Federal University, Vladivostok 690922, Russia

<sup>3</sup> Department of Oncology, Hematology and Bone Marrow Transplantation with Section Pneumology, Hubertus Wald Tumorzentrum – University Cancer Center Hamburg (UCCH), University Medical Center Hamburg-Eppendorf, 20251 Hamburg, Germany

<sup>4</sup> Martini-Klinik, Prostate Cancer Center, University Hospital Hamburg-Eppendorf, 20251 Hamburg, Germany

\* Correspondence: leshchenko.ev@dvfu.ru (E.V.L.); s.dyshlovoy@uke.de (S.A.D.).

Figure S1. HRESIMS for 1

Figure S2. <sup>1</sup>H NMR spectrum of 1 measured at 500 MHz in MeOD

Figure S3. <sup>13</sup>C NMR spectrum of 1 measured at 125 MHz in MeOD

Figure S4. DEPT-135 spectrum of 1 measured at 125 MHz in MeOD

Figure S5. HSQC spectrum of 1 measured in MeOD

Figure S6. COSY spectrum of 1 measured in MeOD

Figure S7. HMBC spectrum of 1 measured in MeOD

Figure S8. HRESIMS for 2

Figure S9. <sup>1</sup>H NMR spectrum of 2 measured at 500 MHz in MeOD

Figure S10.  $^{13}\text{C}$  NMR spectrum of 2 measured at 125 MHz in MeOD

Figure S11. DEPT-135 spectrum of 2 measured at 125 MHz in MeOD

Figure S12. HSQC spectrum of 2 measured in MeOD

Figure S13. COSY spectrum of 2 measured in MeOD

Figure S14. HMBC spectrum of 2 measured in DMSO- $d_6$

Figure S15. HRESIMS for 3

Figure S16.  $^1\text{H}$  NMR spectrum of 3 measured at 500 MHz in MeOD

Figure S17.  $^{13}\text{C}$  NMR spectrum of 3 measured at 75 MHz in MeOD

Figure S18. DEPT-135 spectrum of 3 measured at 75 MHz in MeOD

Figure S19. HSQC spectrum of 3 measured in MeOD

Figure S20. COSY spectrum of 3 measured in MeOD

Figure S21. HMBC spectrum of 3 measured in MeOD

Figure S22. HRESIMS for 4

Figure S23.  $^1\text{H}$  NMR spectrum of 4 measured at 500 MHz in MeOD

Figure S24.  $^{13}\text{C}$  NMR spectrum of 4 measured at 75 MHz in MeOD

Figure S25. DEPT-135 spectrum of 4 measured at 75 MHz in MeOD

Figure S26. HSQC spectrum of 4 measured in MeOD

Figure S27. COSY spectrum of 4 measured in MeOD

Figure S28. HMBC spectrum of 4 in MeOD

Figure S29. HRESIMS for 5

Figure S30.  $^1\text{H}$  NMR spectrum of 5 measured at 500 MHz in MeOD

Figure S31.  $^{13}\text{C}$  NMR spectrum of 5 measured at 125 MHz in MeOD

Figure S32. DEPT-135 spectrum of 5 measured at 125 MHz in MeOD

Figure S33. HSQC spectrum of 5 measured in MeOD

Figure S34. COSY spectrum of 5 measured in MeOD

Figure S35. HMBC spectrum of 5 in MeOD

Figure S36. HRESIMS for 6

Figure S37.  $^1\text{H}$  NMR spectrum of 6 measured at 700 MHz in acetone- $\text{d}_6$

Figure S38.  $^{13}\text{C}$  NMR spectrum of 6 measured at 175 MHz in acetone- $\text{d}_6$

Figure S39. DEPT-135 spectrum of 6 measured at 175 MHz in acetone- $\text{d}_6$

Figure S40. HSQC spectrum of 6 measured in acetone- $\text{d}_6$

Figure S41. COSY spectrum of 6 measured in acetone- $\text{d}_6$

Figure S42. HMBC spectrum of 6 in acetone- $\text{d}_6$

Figure S43. HRESIMS data for 6a

Figure S44.  $^1\text{H}$  NMR spectrum of 6a measured at 700 MHz in acetone- $\text{d}_6$

Figure S45.  $^{13}\text{C}$  NMR spectrum of 6a measured at 175 MHz in acetone- $\text{d}_6$

Figure S46. HSQC spectrum of 6a measured in acetone- $\text{d}_6$

Figure S47. COSY spectrum of 6a measured in acetone- $\text{d}_6$

Figure S48. UV and CD data for 1

Figure S49. UV and CD data for 3

Figure S50. UV and CD data for 4

Figure S51. UV and CD data for 5

Figure S52. UV and CD data for 6

Figure S53. <sup>1</sup>H NMR spectrum for MTPA-2a (S)

Figure S54. <sup>1</sup>H NMR spectrum for MTPA-2b (R)

Figure S55. COSY spectrum for MTPA-2b (R)

Figure S56. HSQC spectrum for MTPA-2b (R)

Figure S57. Scheme of isolation compounds 1-4.

Figure S58. ROESY spectrum for 1 in MeOD

Figure S59. ROESY spectrum for 2 in MeOD

Figure S60. ROESY spectrum for 3 in MeOD

Figure S61. ROESY spectrum for 4 in MeOD

Figure S62. ROESY spectrum for 5 in MeOD

Figure S63. ROESY spectrum for 6 in acetone-d<sub>6</sub>

Figure S1. HRESIMS for 1

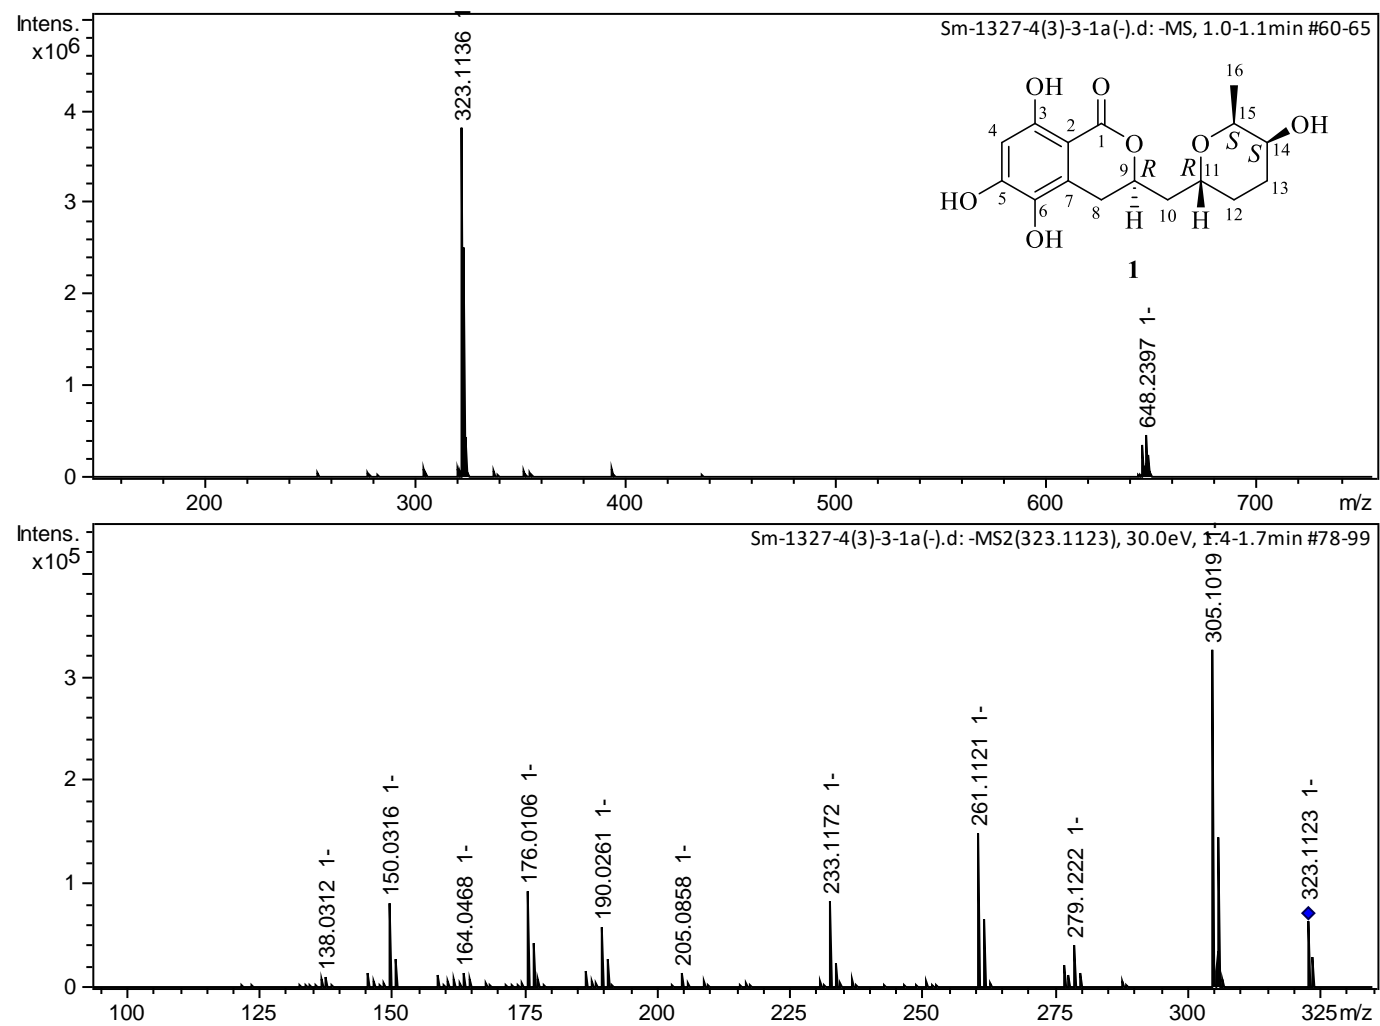

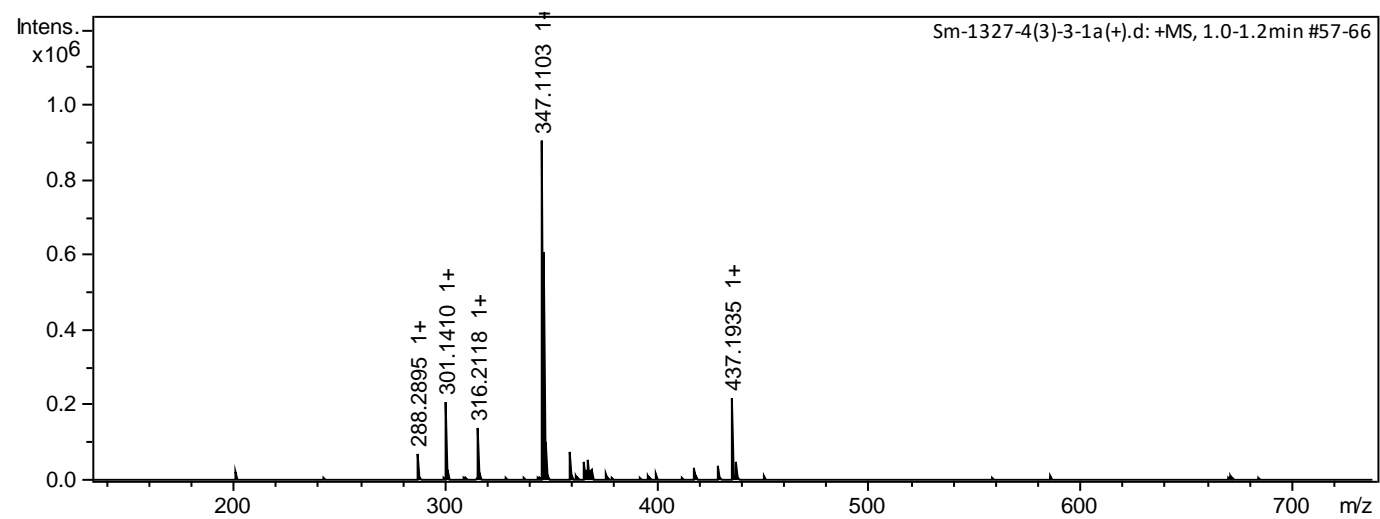

|                     | meas     | calc     | $\Delta$<br>(ppm) |
|---------------------|----------|----------|-------------------|
| [M-H] <sup>-</sup>  | 323,1136 | 323,1136 | 0,2               |
| [M+Na] <sup>+</sup> | 347,1103 | 347,1101 | -0,4              |

Figure S2.  $^1\text{H}$  NMR spectrum of **1** measured at 500 MHz in MeOD

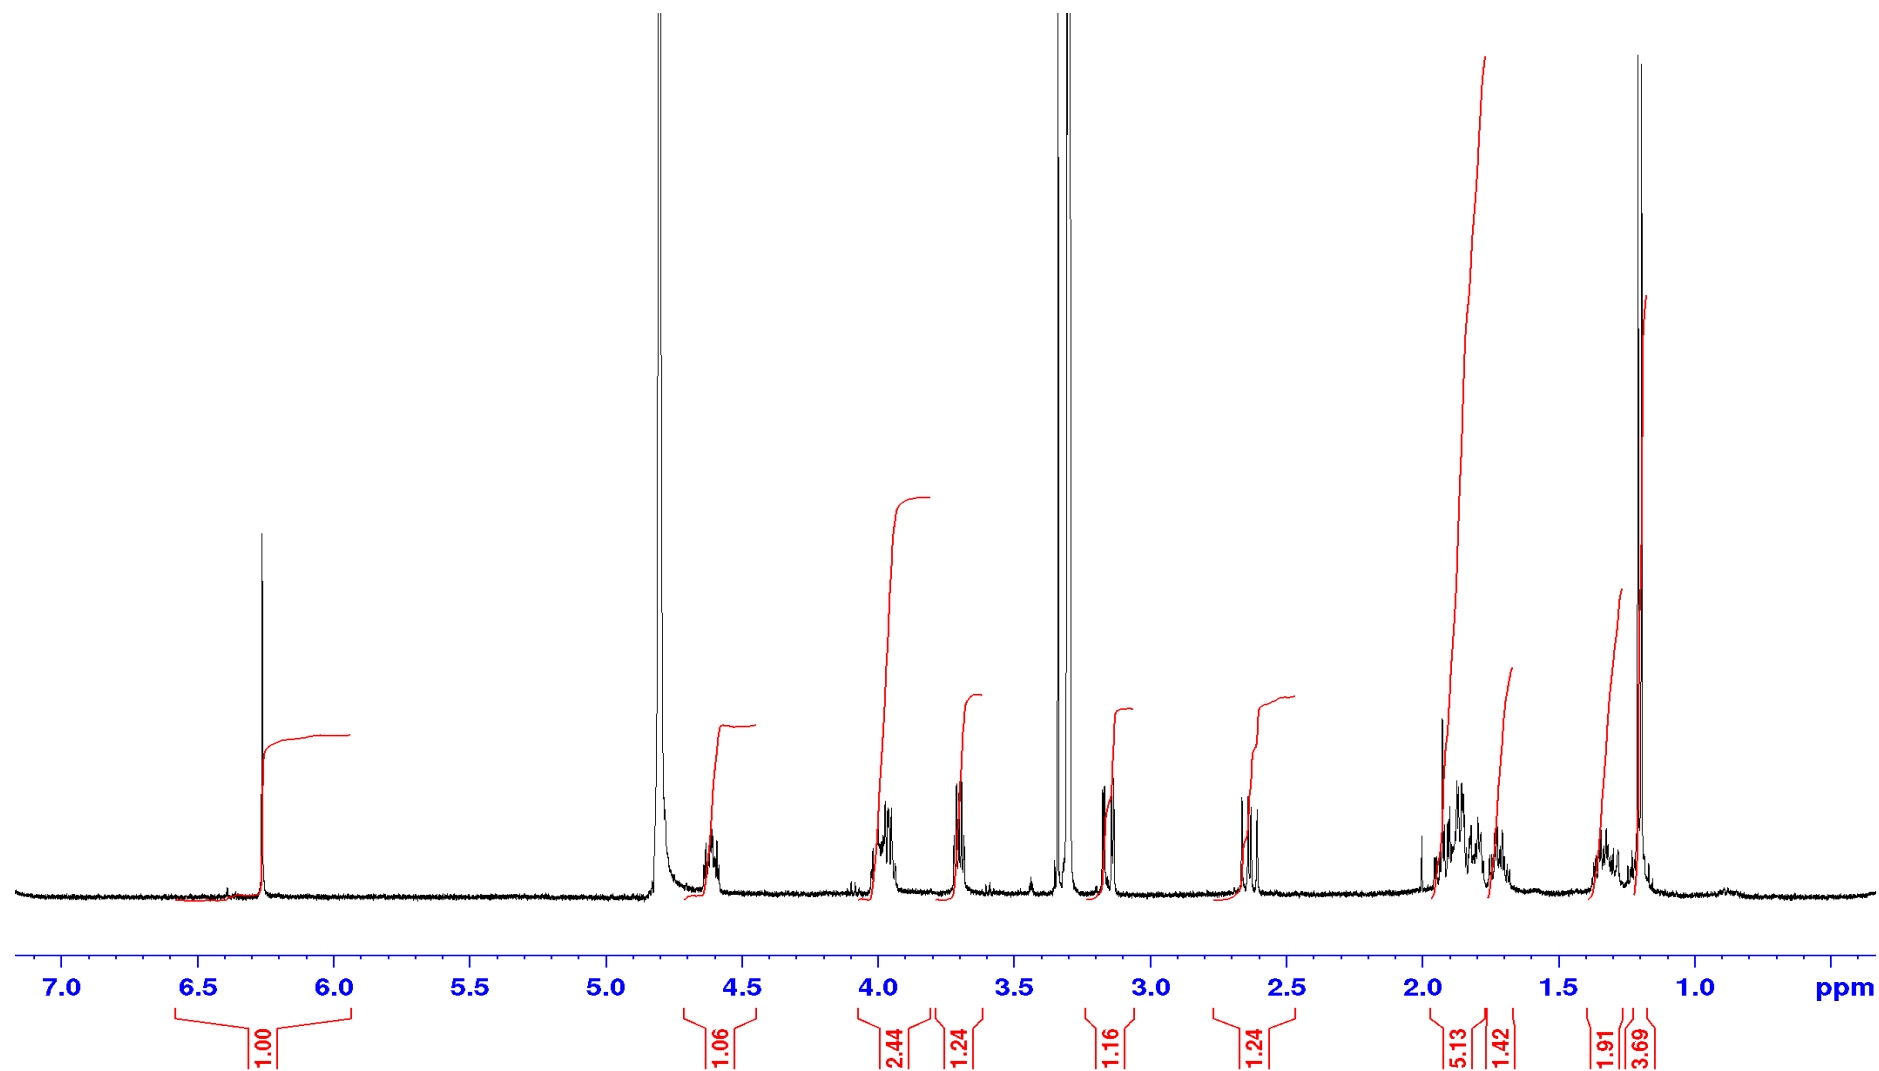

Figure S3.  $^{13}\text{C}$  NMR spectrum of **1** measured at 125 MHz in MeOD

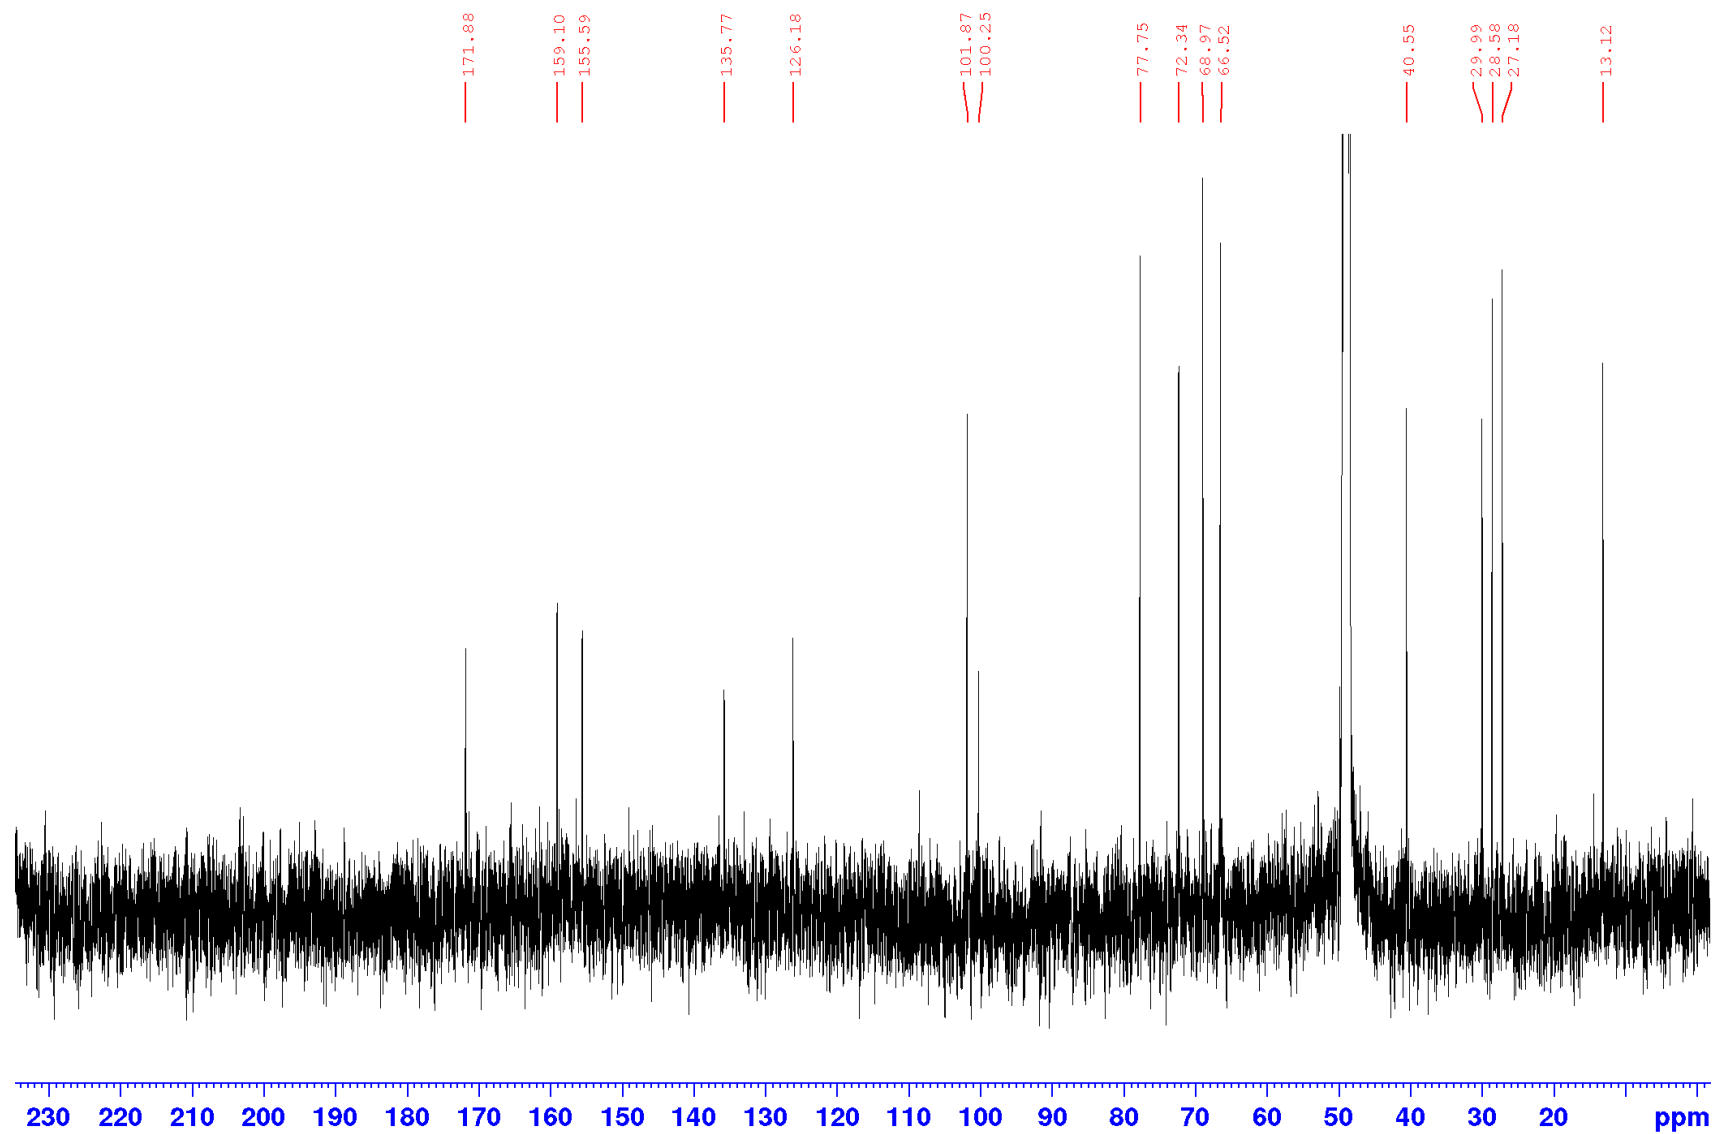



Figure S4. DEPT-135 spectrum of **1** measured at 125 MHz in MeOD

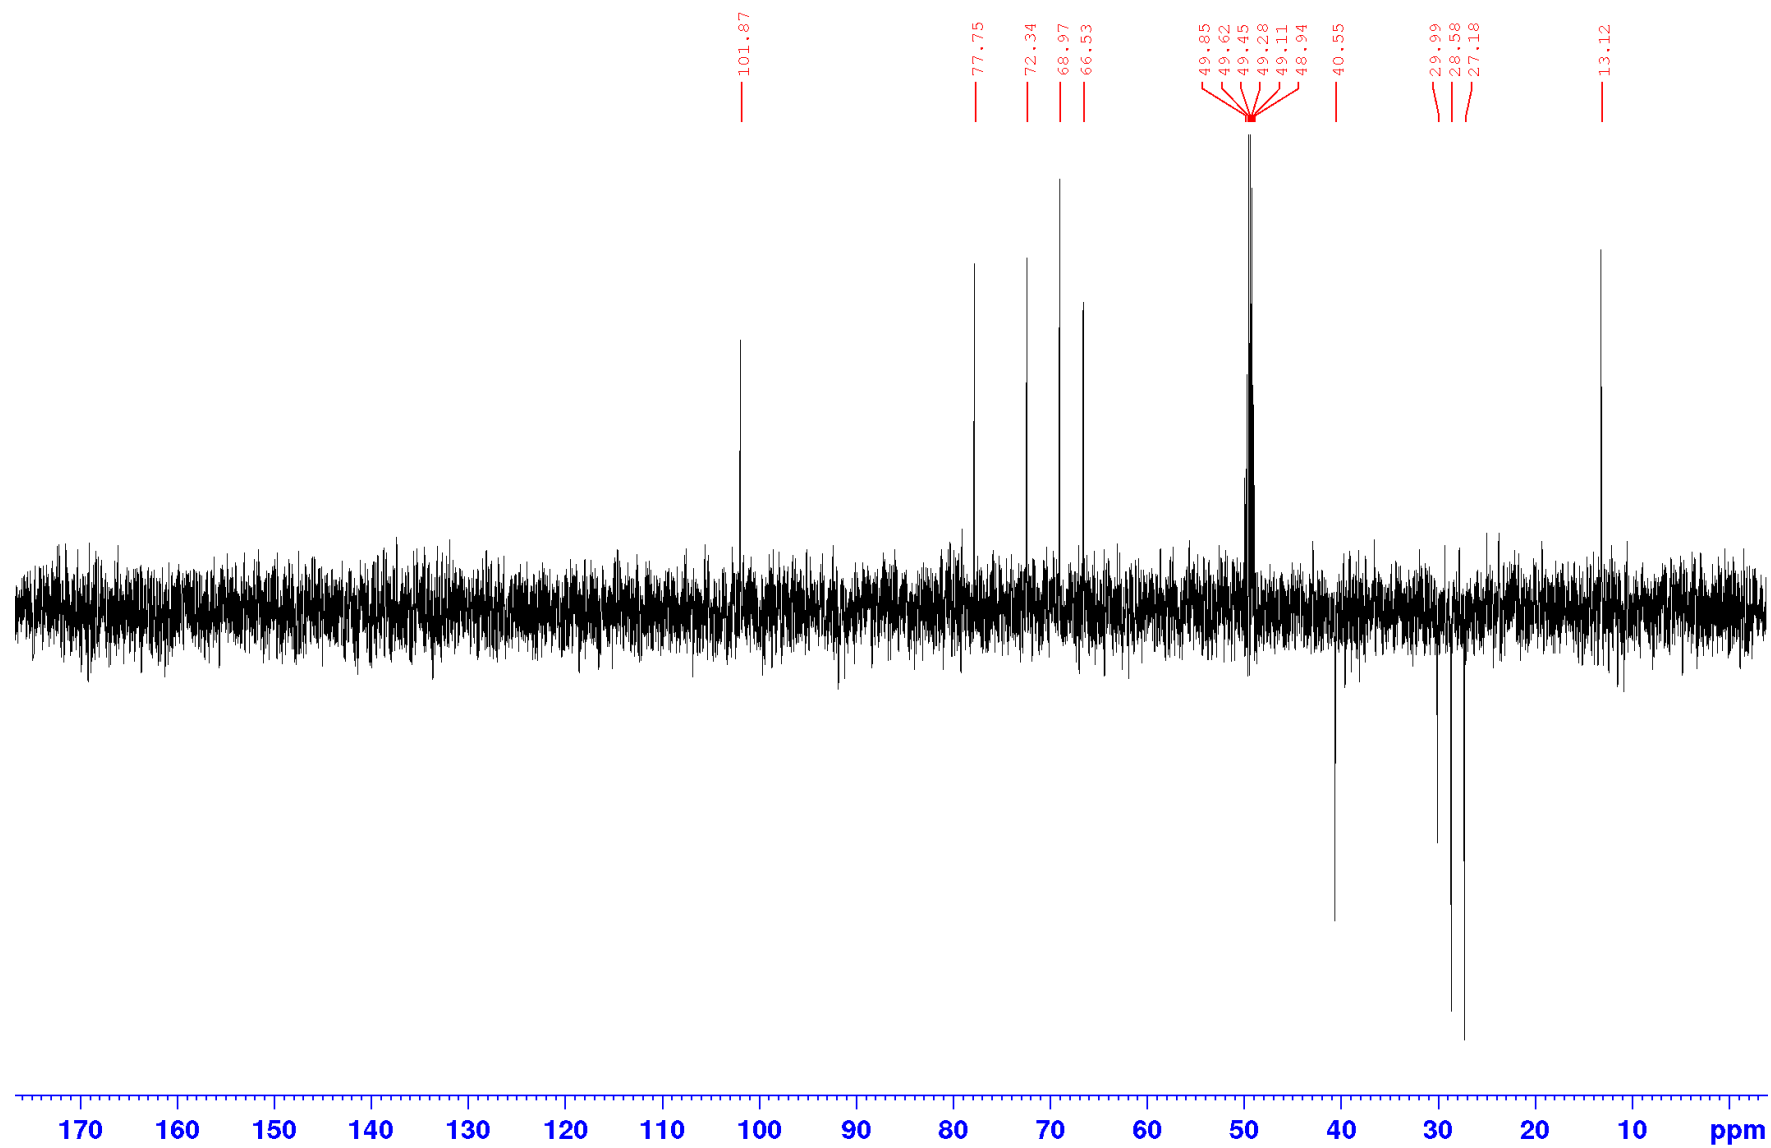

Figure S5. HSQC spectrum of 1 measured in MeOD

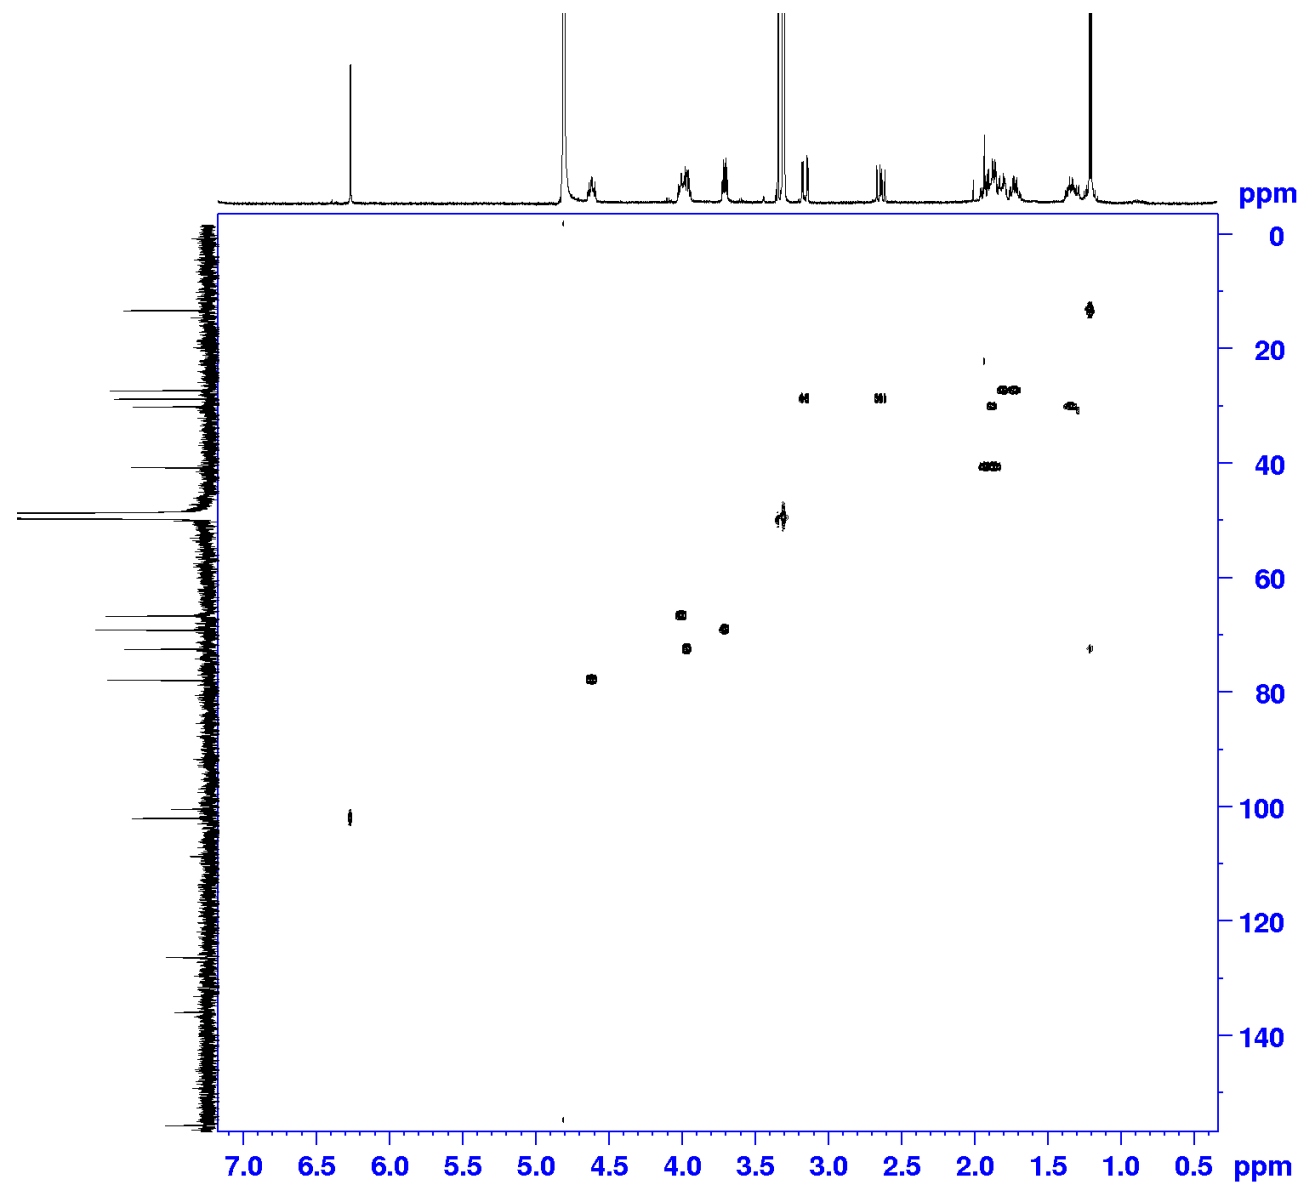

Figure S6. COSY spectrum of 1 measured in MeOD

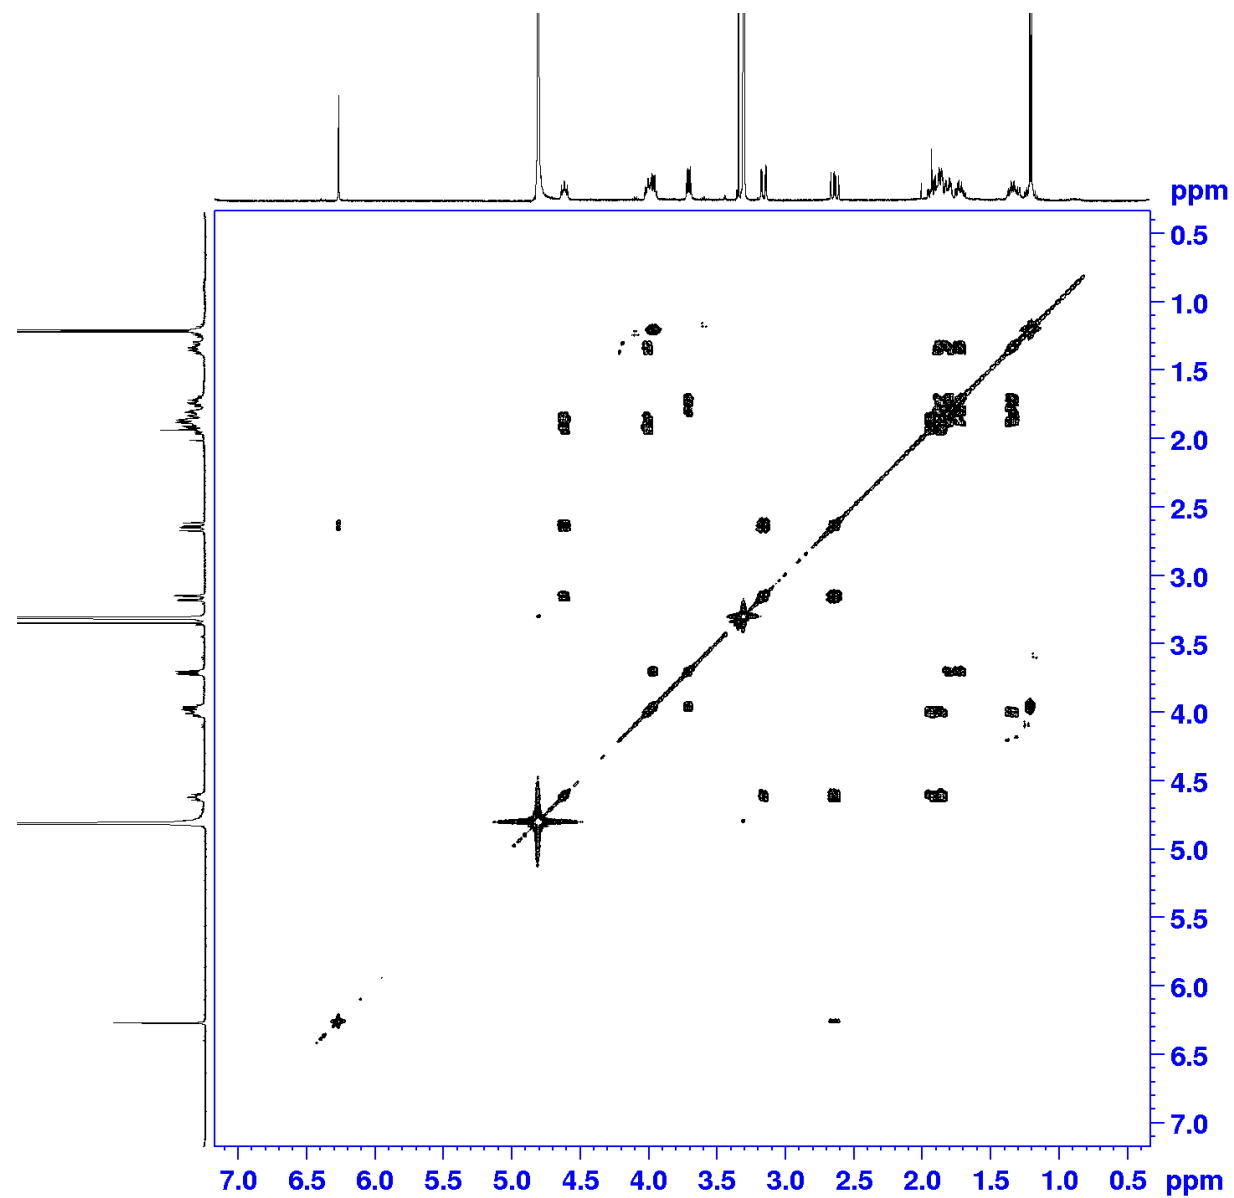

Figure S7. HMBC spectrum of 1 measured in MeOD

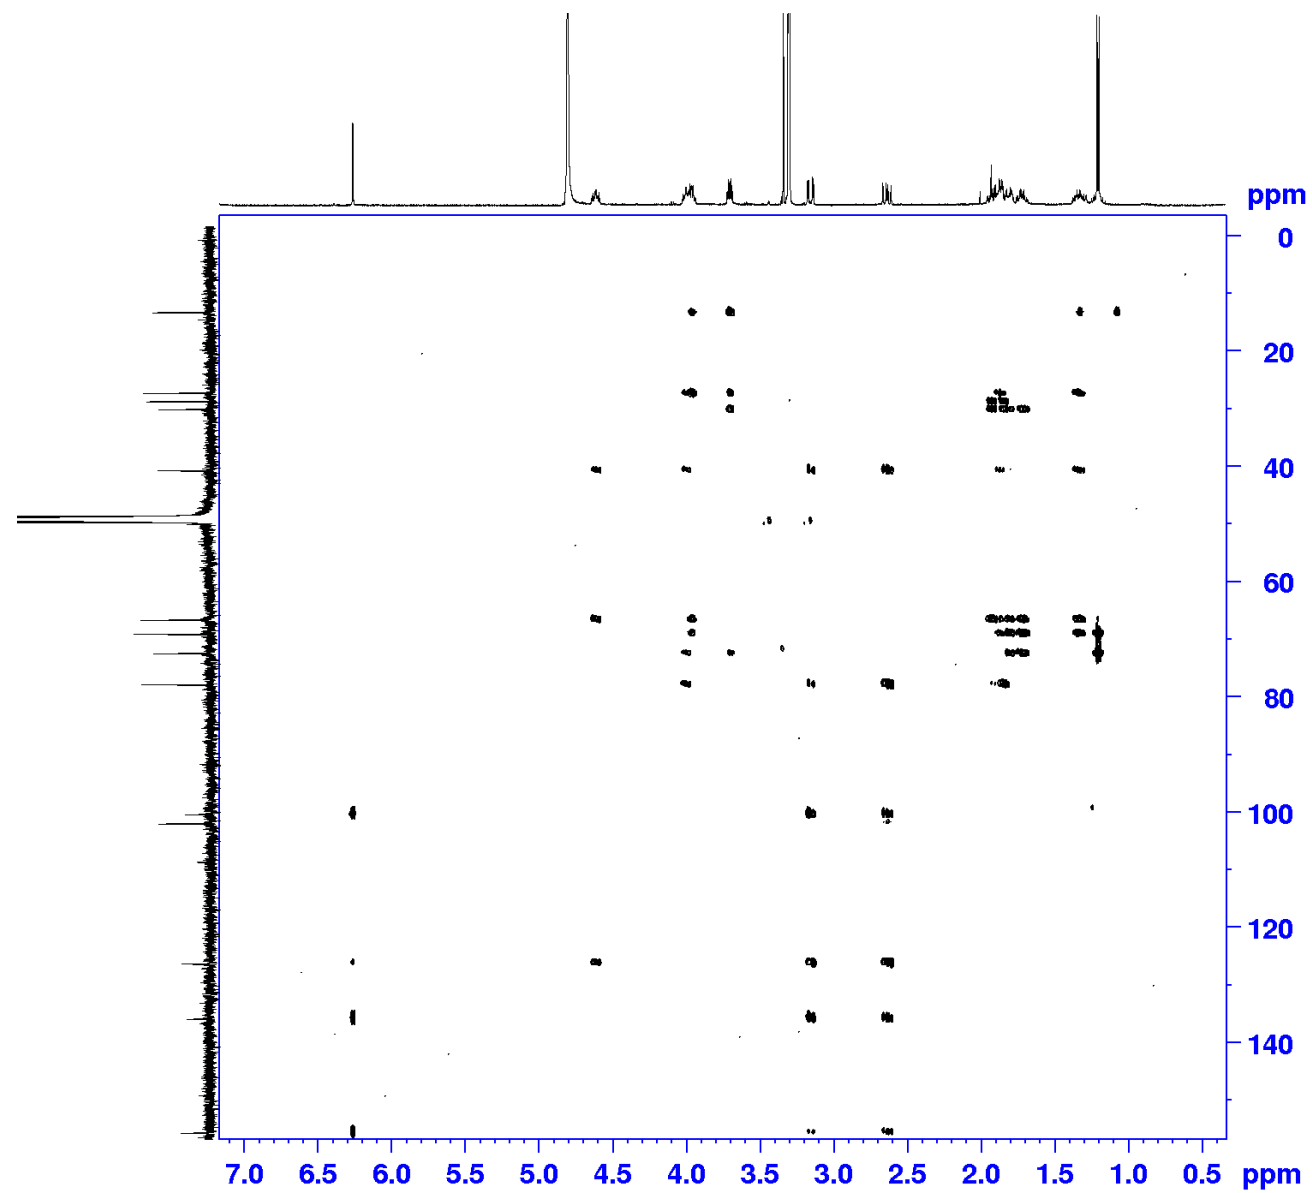

Figure S8. HRESIMS for 2

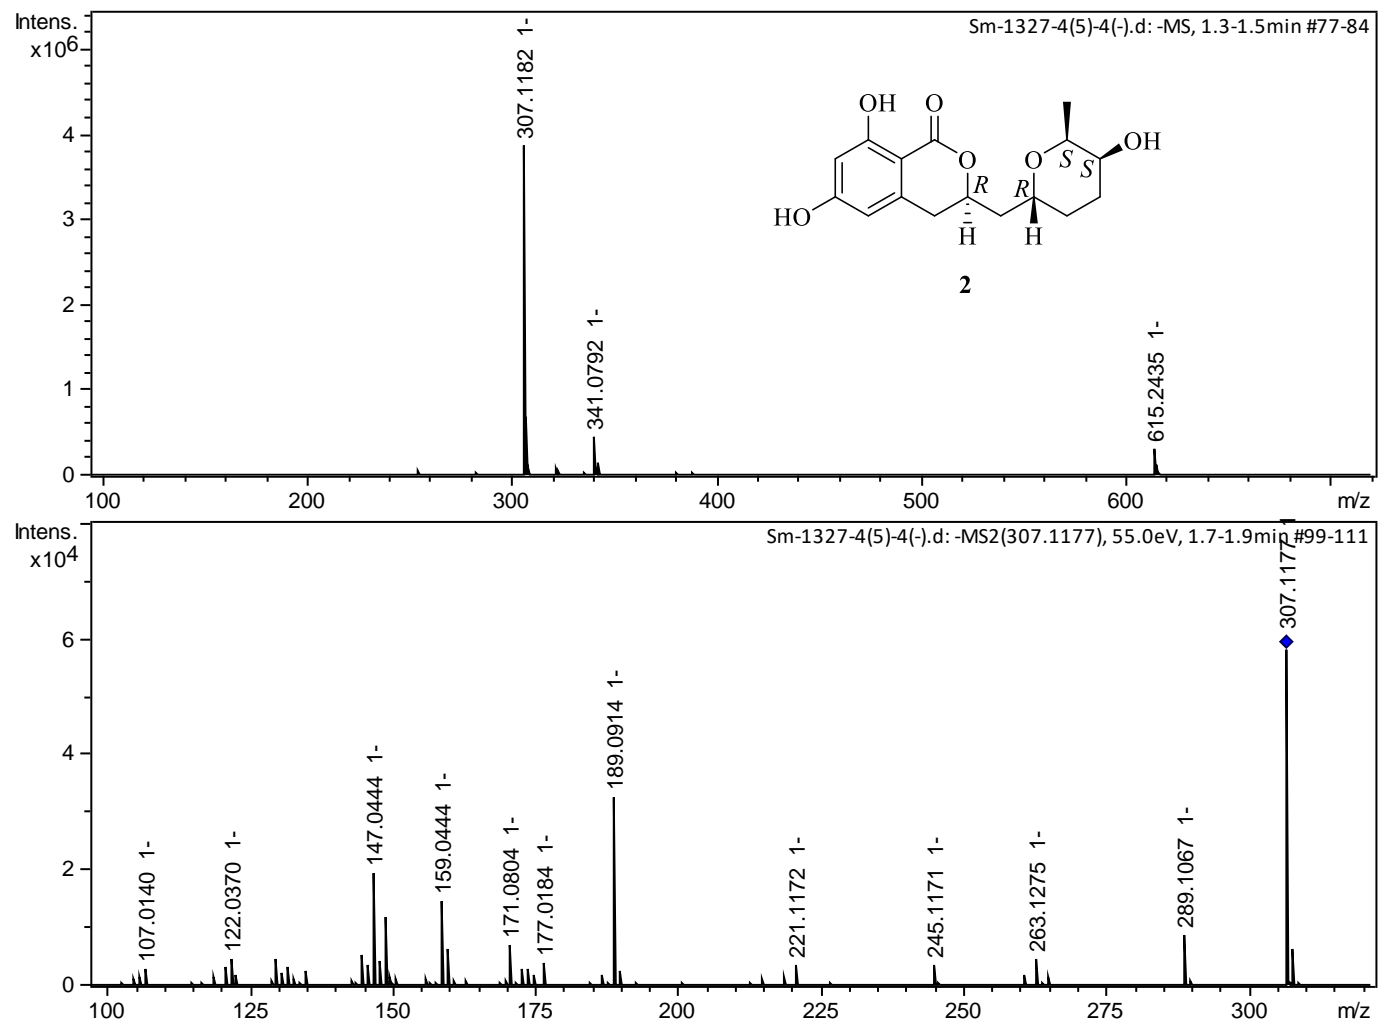

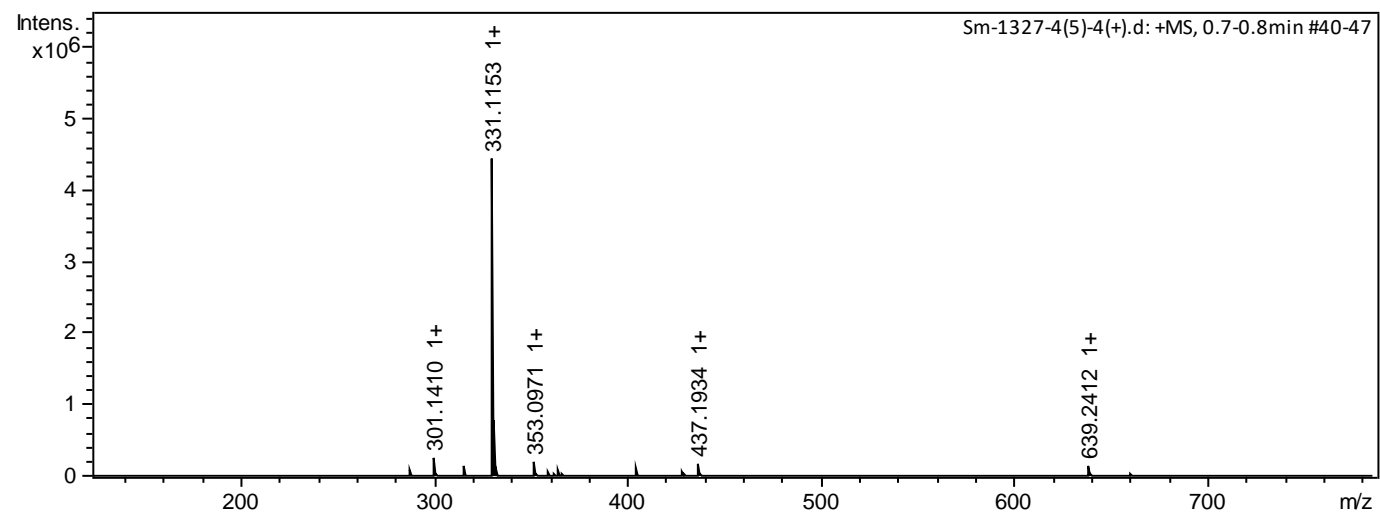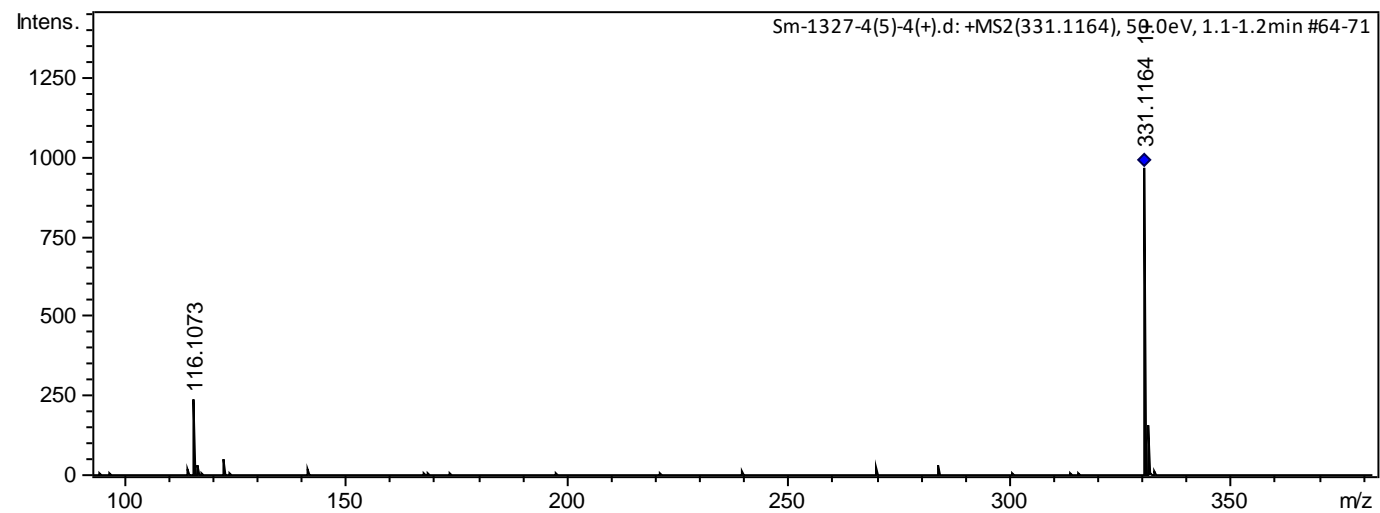

Figure S9.  $^1\text{H}$  NMR spectrum of **2** measured at 500 MHz in MeOD

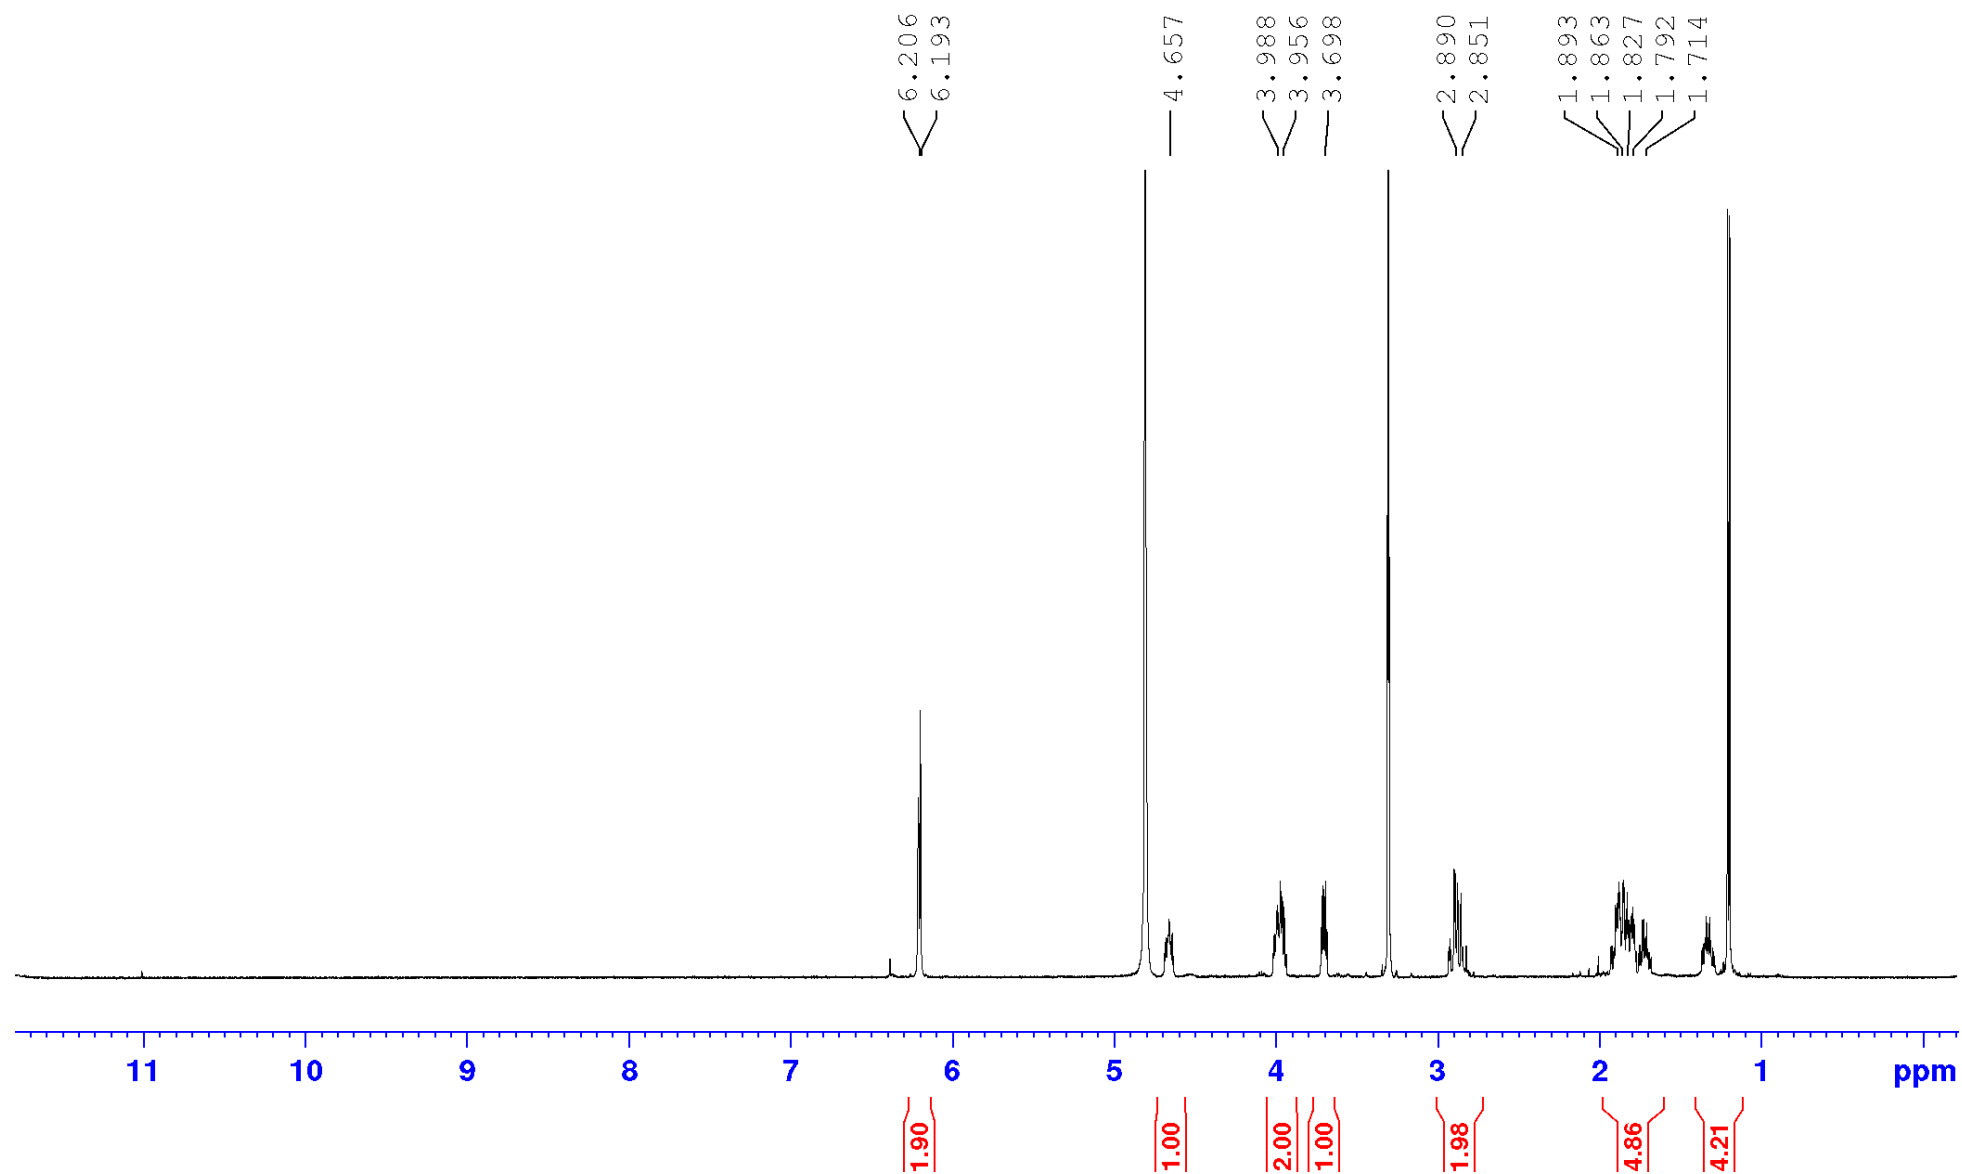

Figure S10.  $^{13}\text{C}$  NMR spectrum of **2** measured at 125 MHz in MeOD

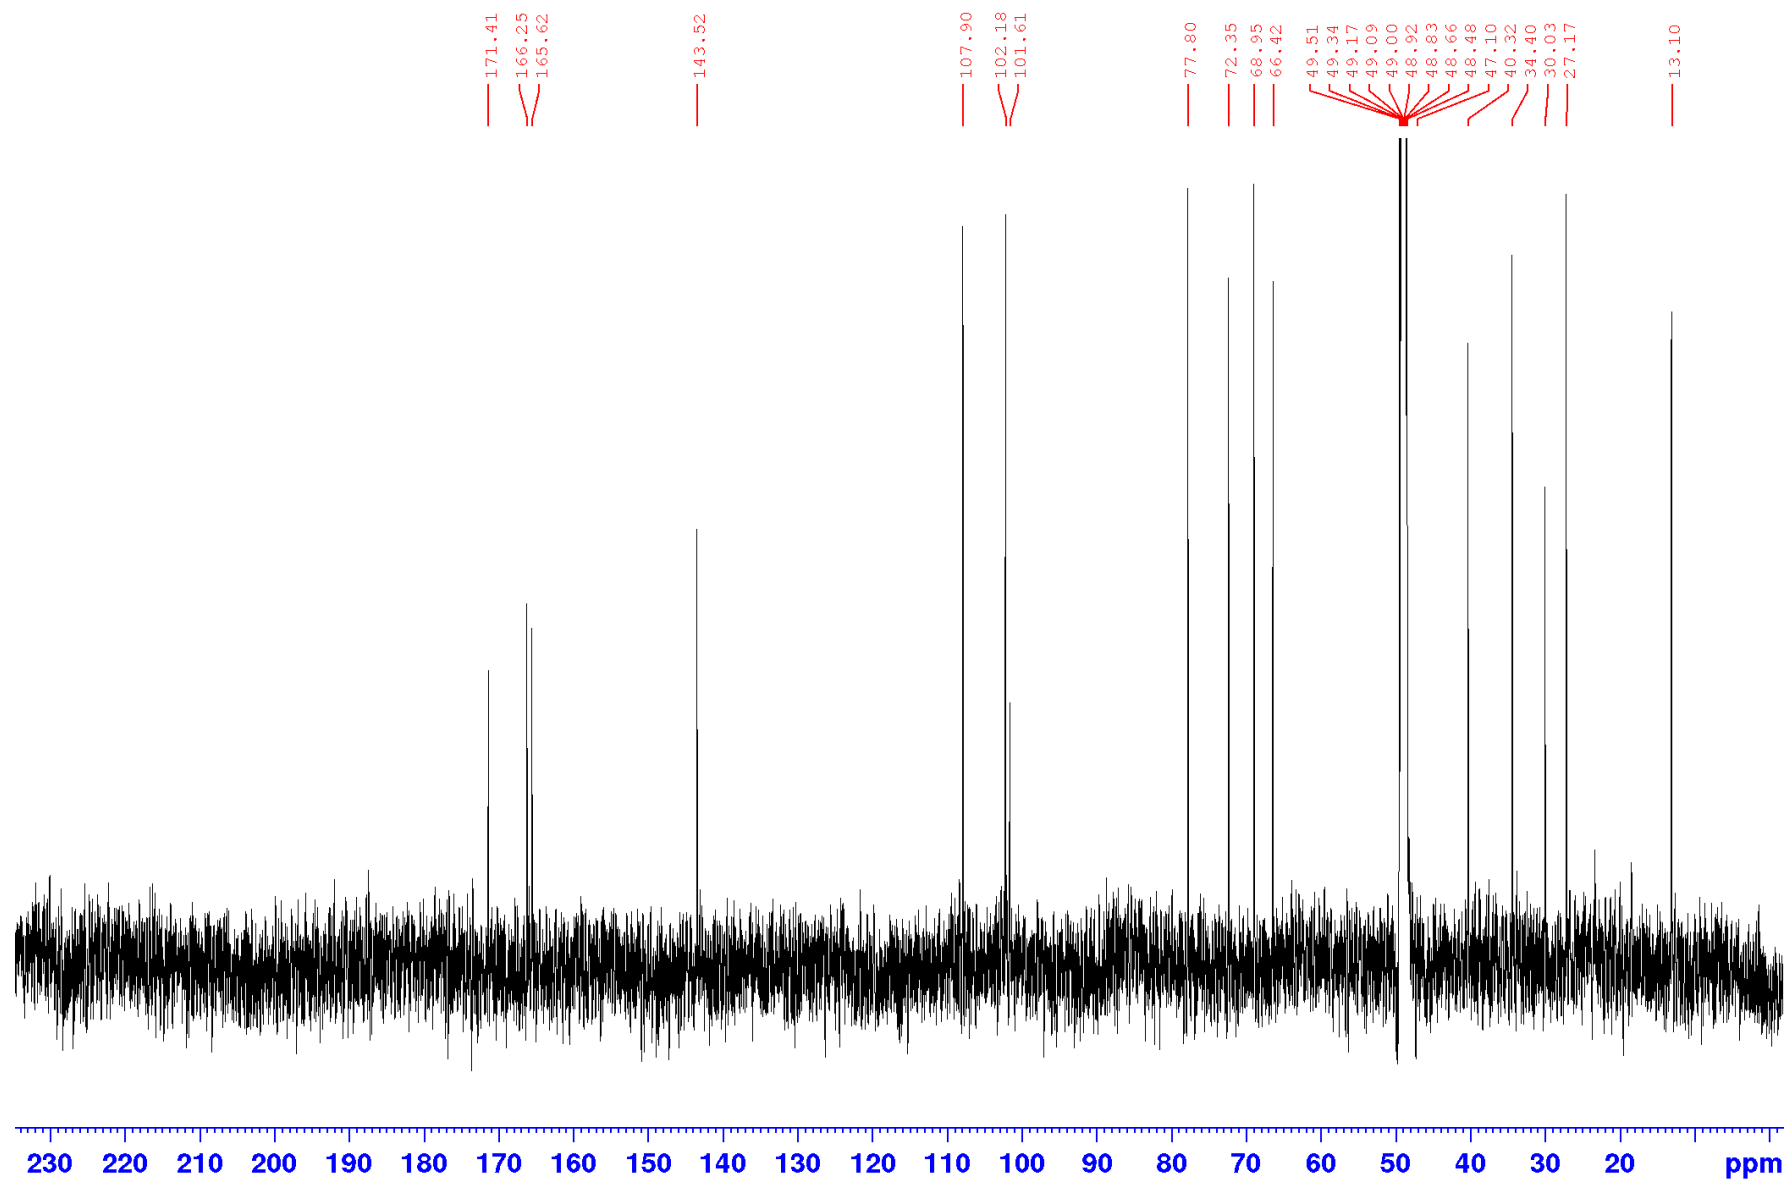



Figure S11. DEPT-135 spectrum of 2 measured at 125 MHz in MeOD

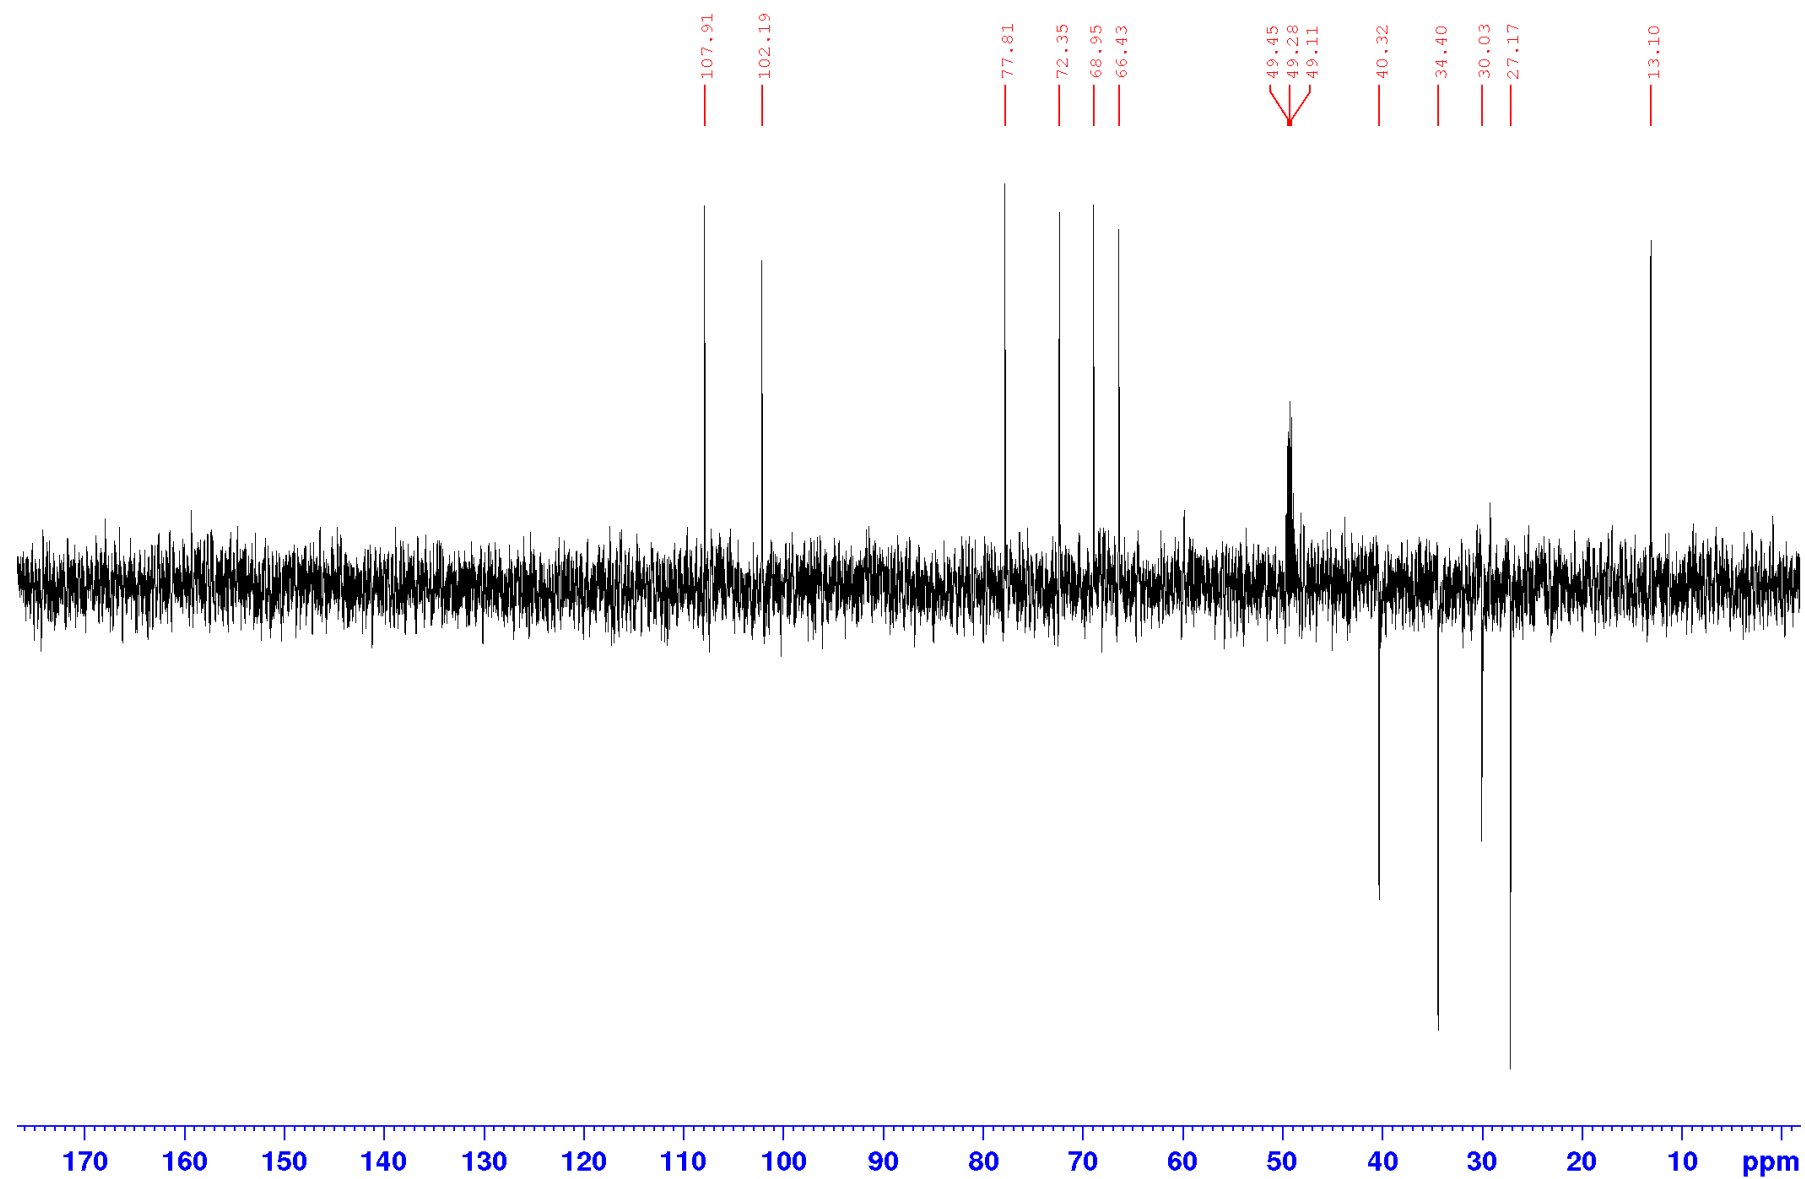

Figure S12. HSQC spectrum of 2 measured in MeOD

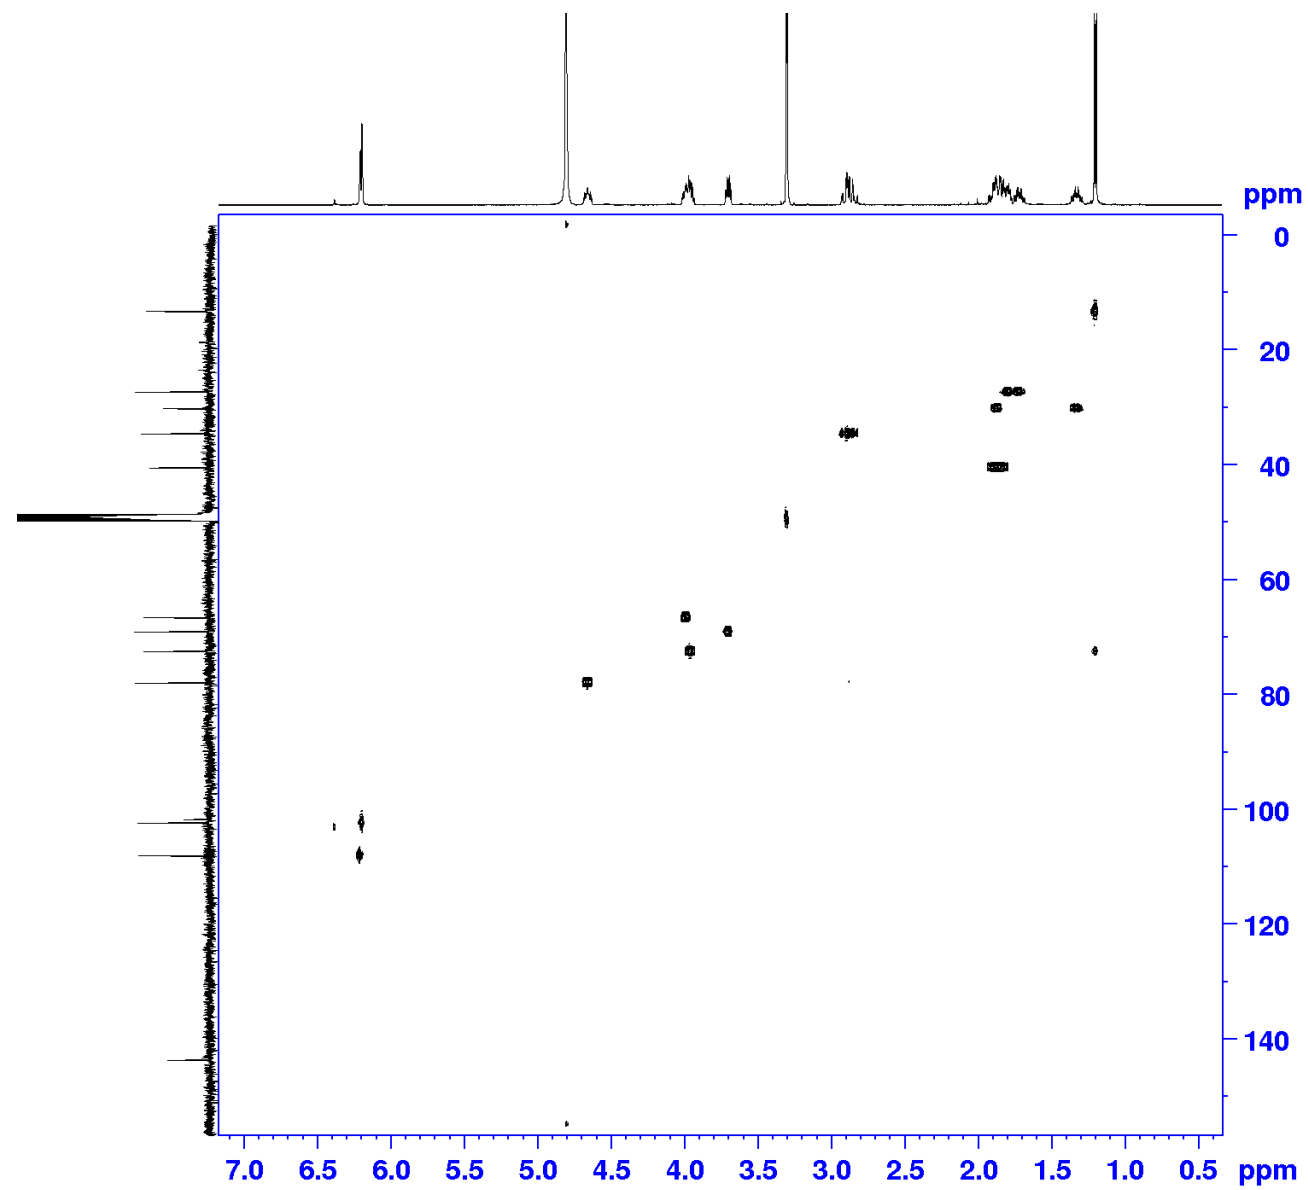

Figure S13. COSY spectrum of 2 measured in MeOD

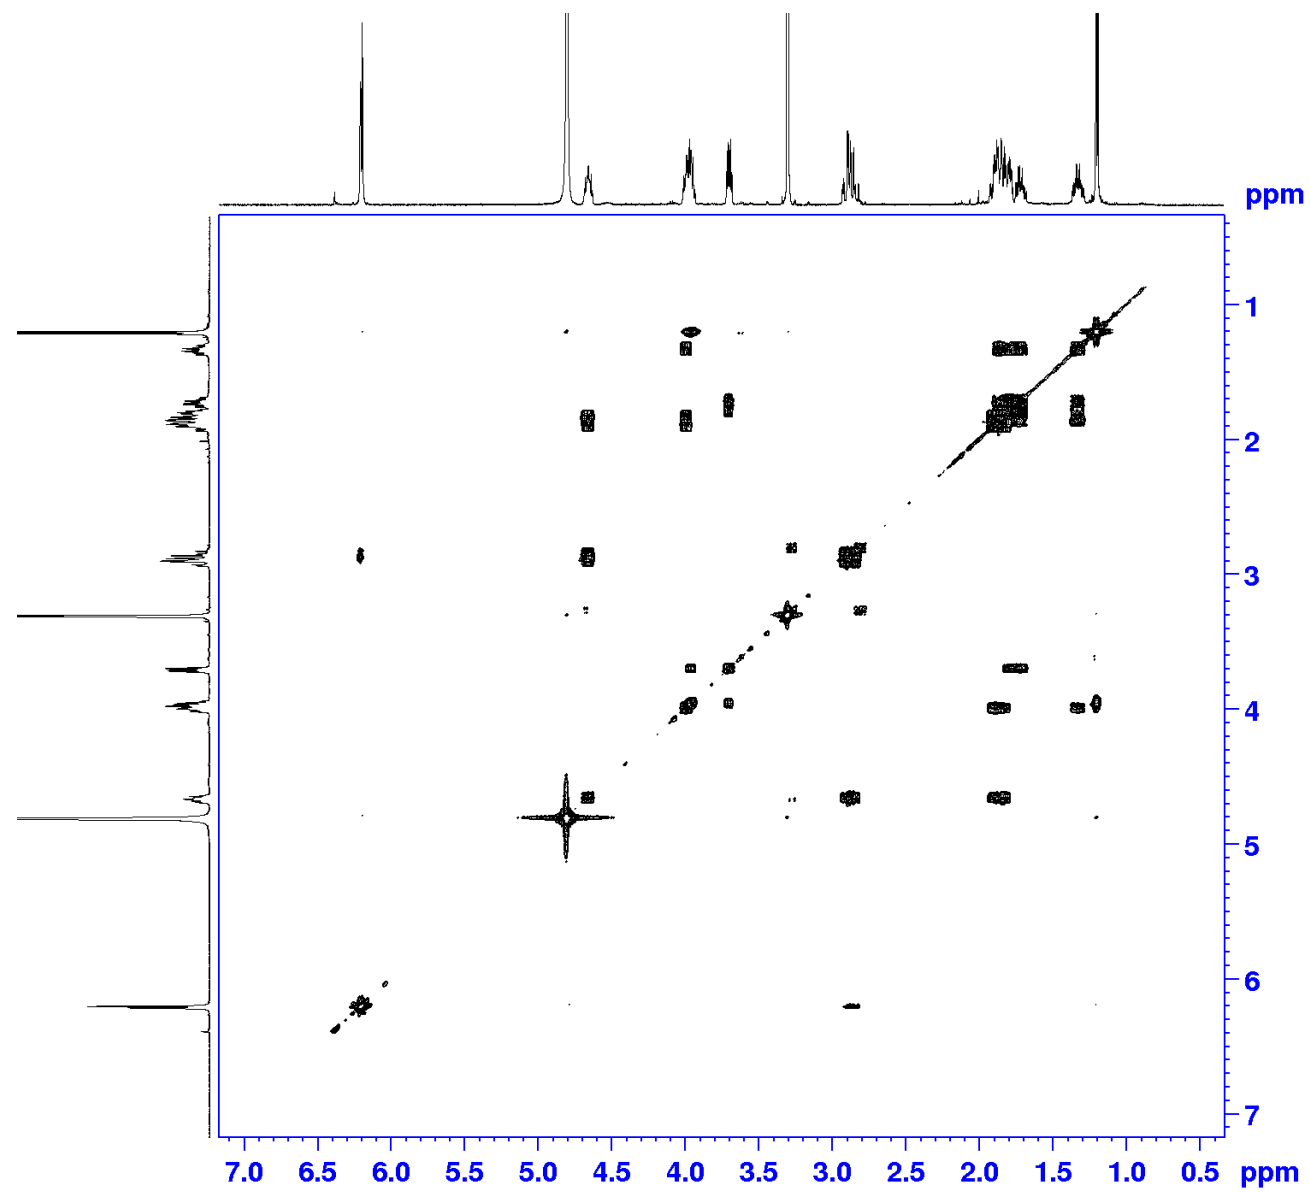

Figure S14. HMBC spectrum of 2 measured in DMSO-d6

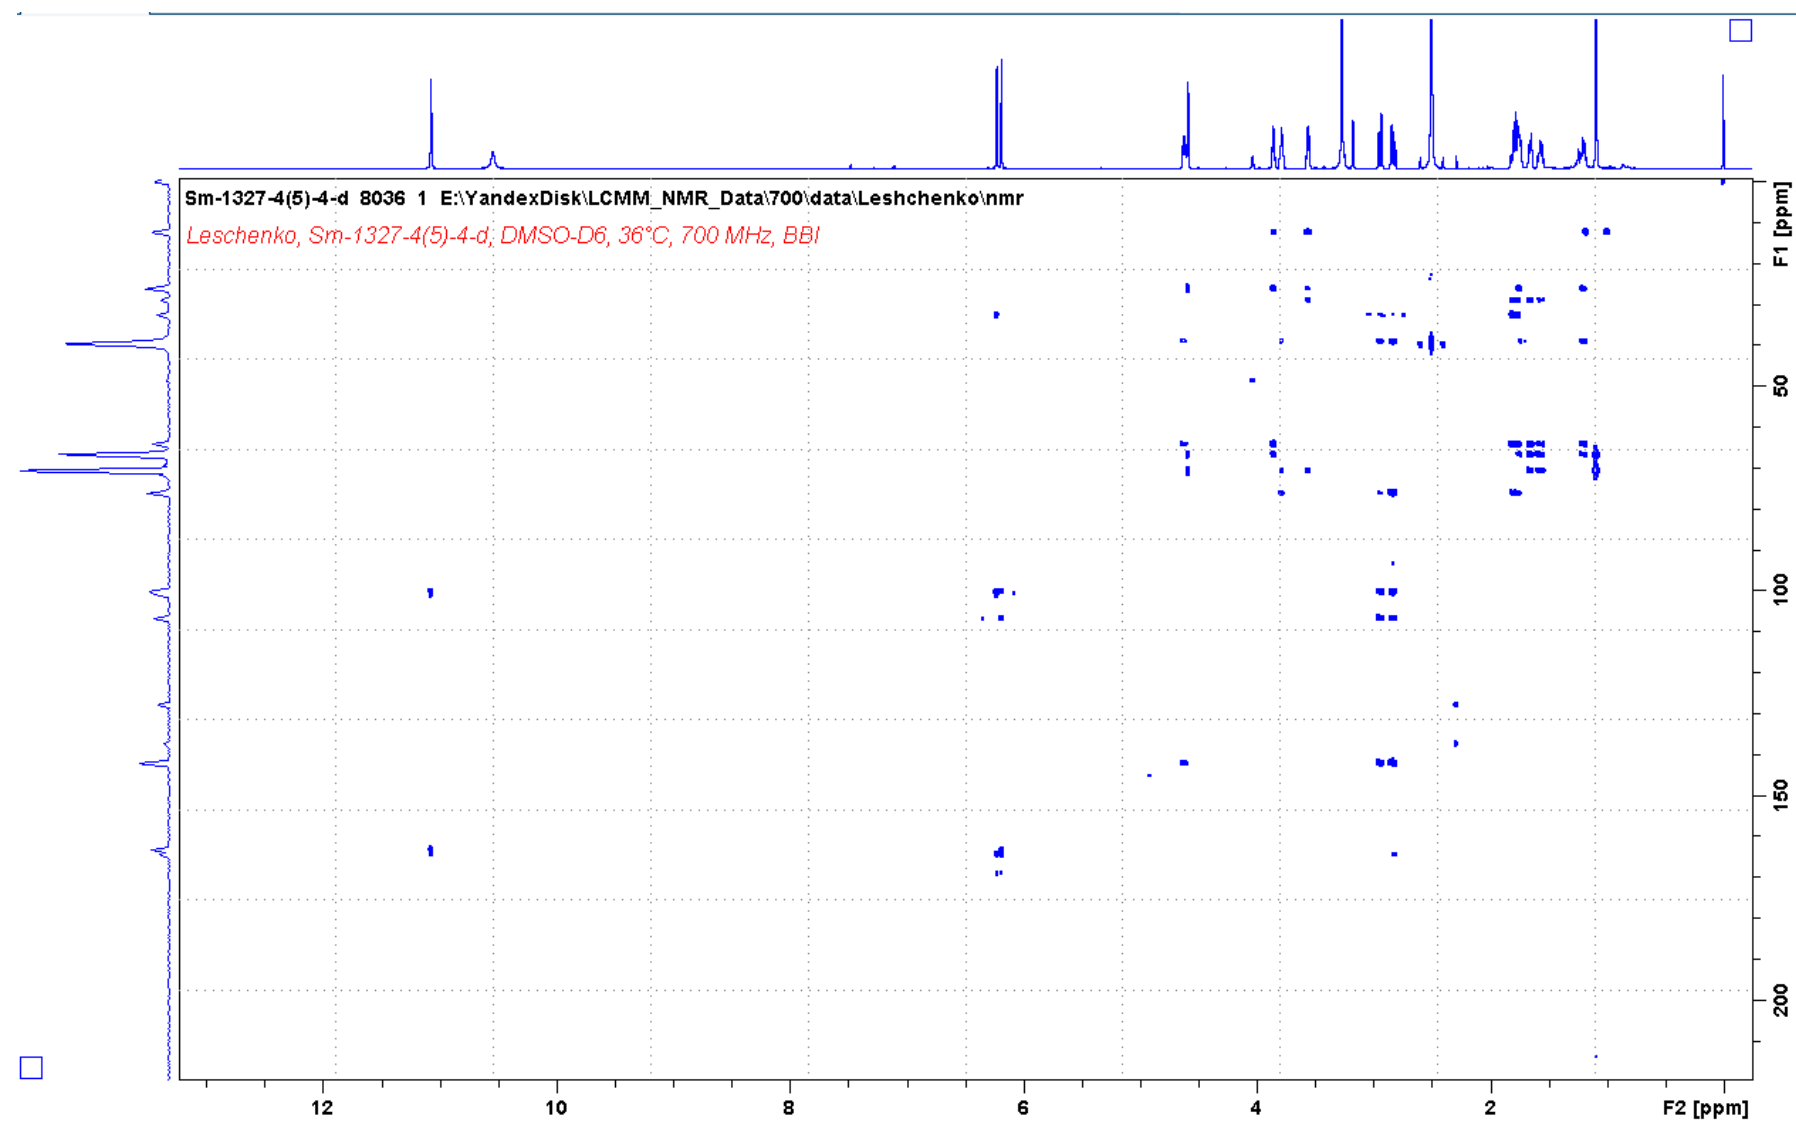

**Figure S15. HRESIMS for 3**

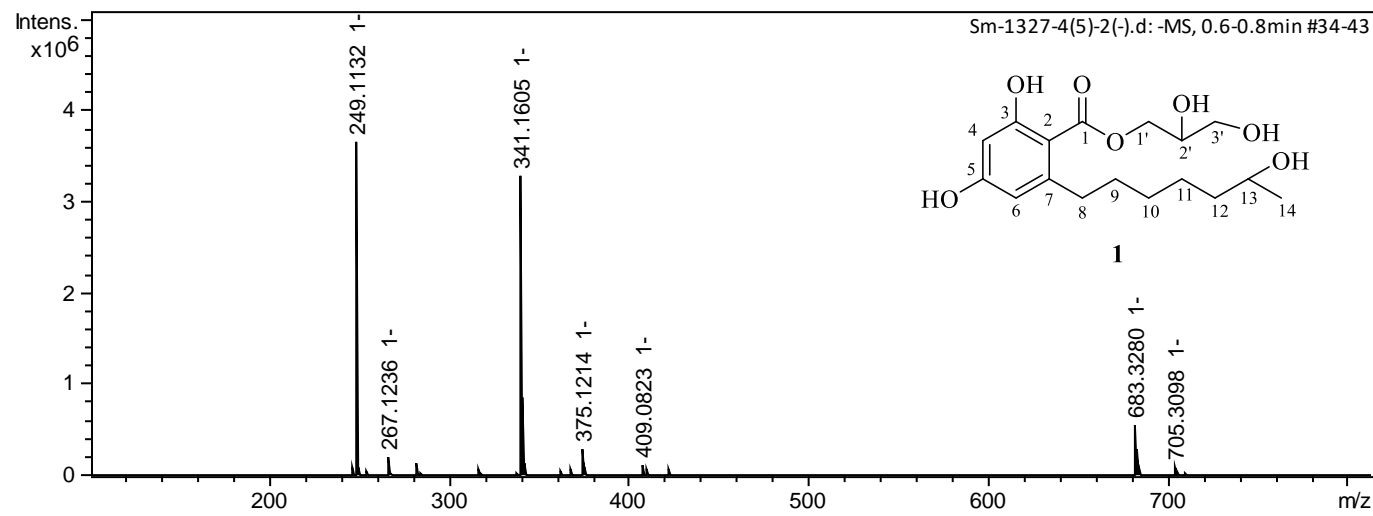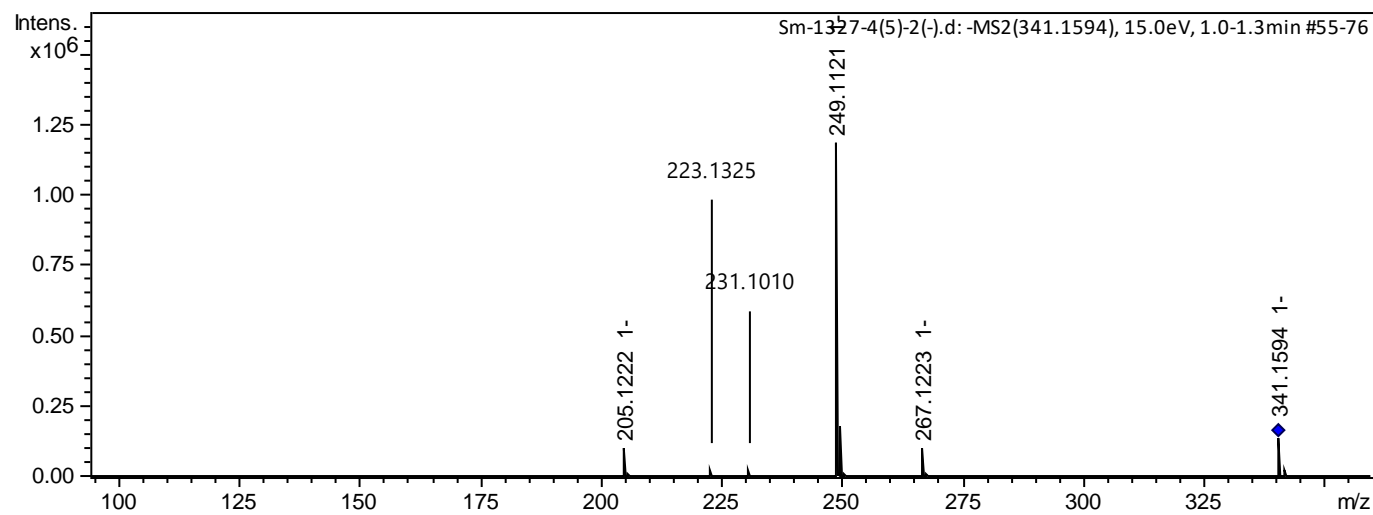

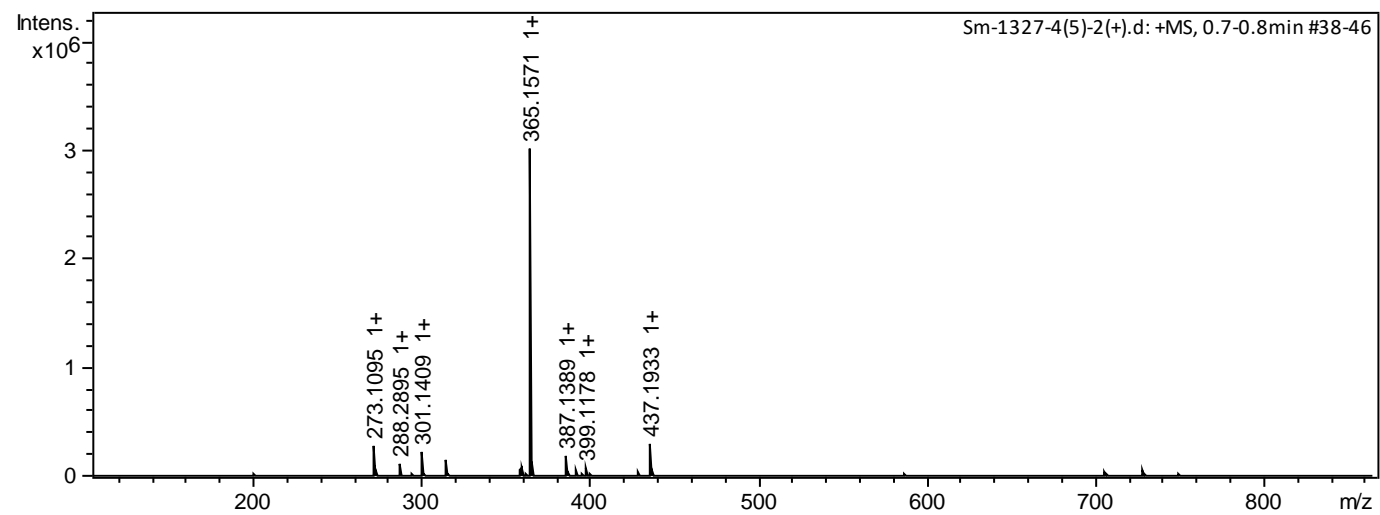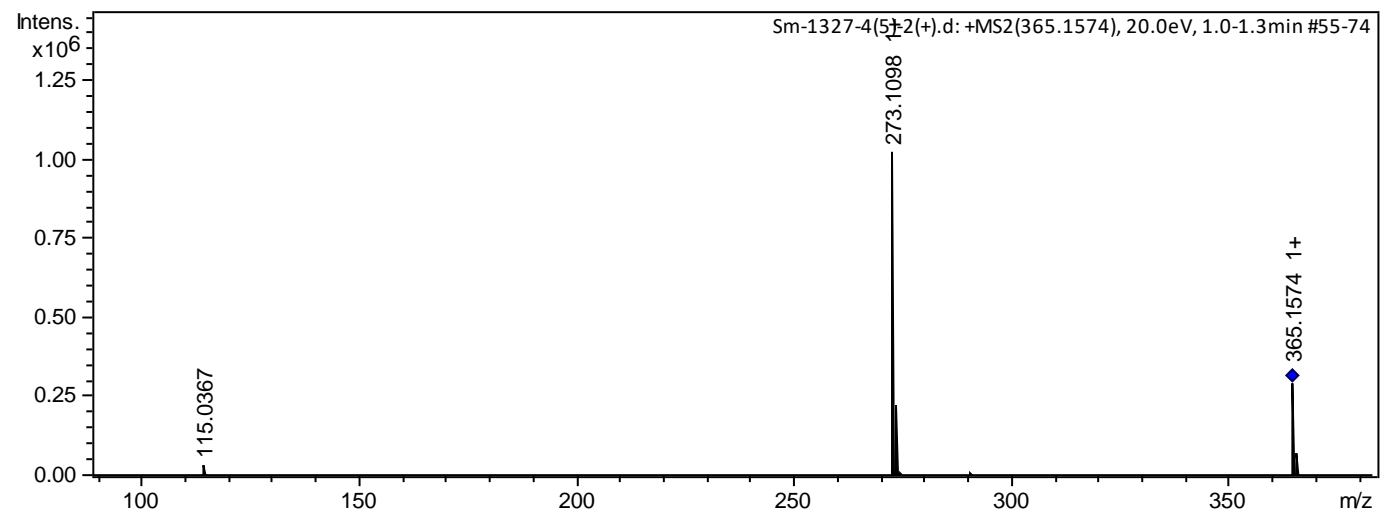

|                     | meas     | calc     | $\Delta$<br>(ppm) |
|---------------------|----------|----------|-------------------|
| [M-H] <sup>-</sup>  | 341,1605 | 341,1606 | 0,1               |
| [M+Na] <sup>+</sup> | 365,1571 | 365,1571 | -0,1              |

Figure S16.  $^1\text{H}$  NMR spectrum of **3** measured at 500 MHz in MeOD

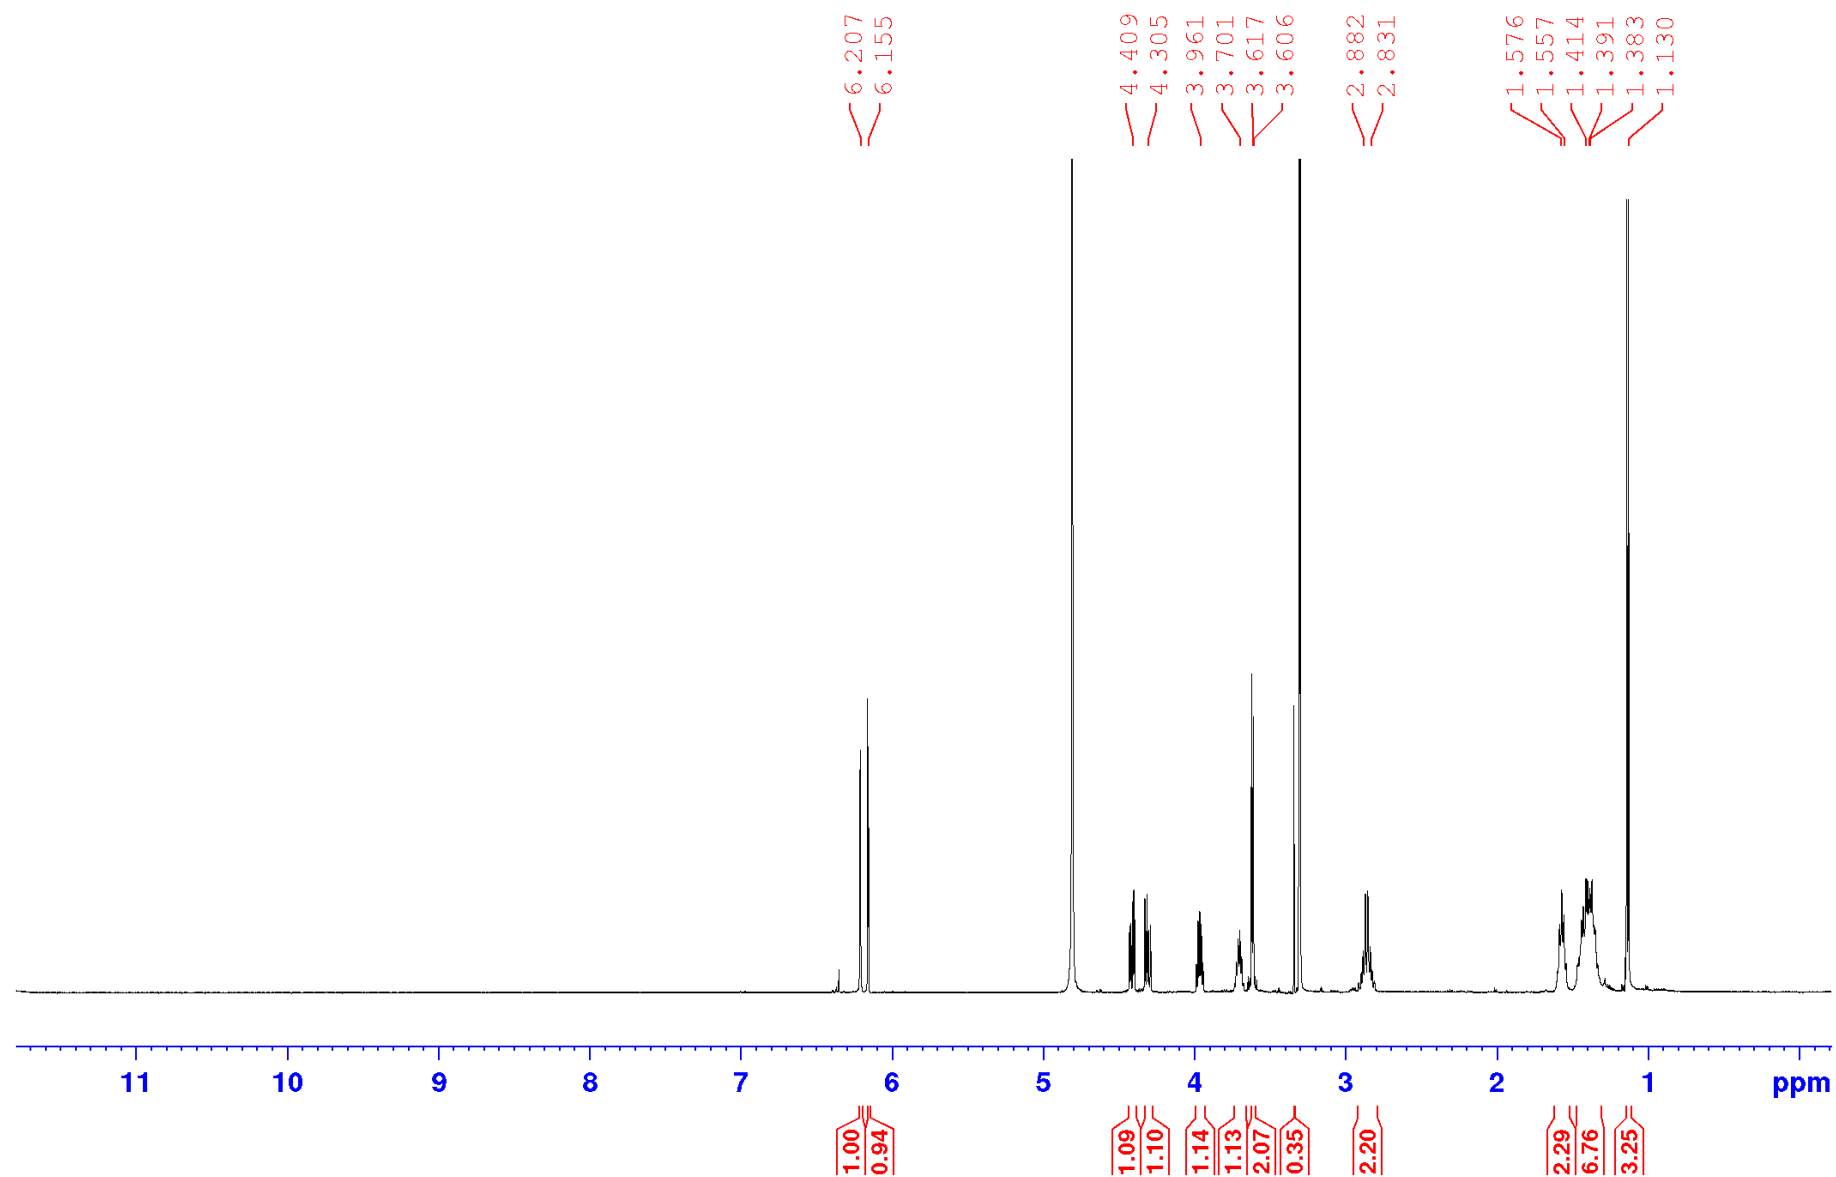

Figure S17.  $^{13}\text{C}$  NMR spectrum of 3 measured at 75 MHz in MeOD

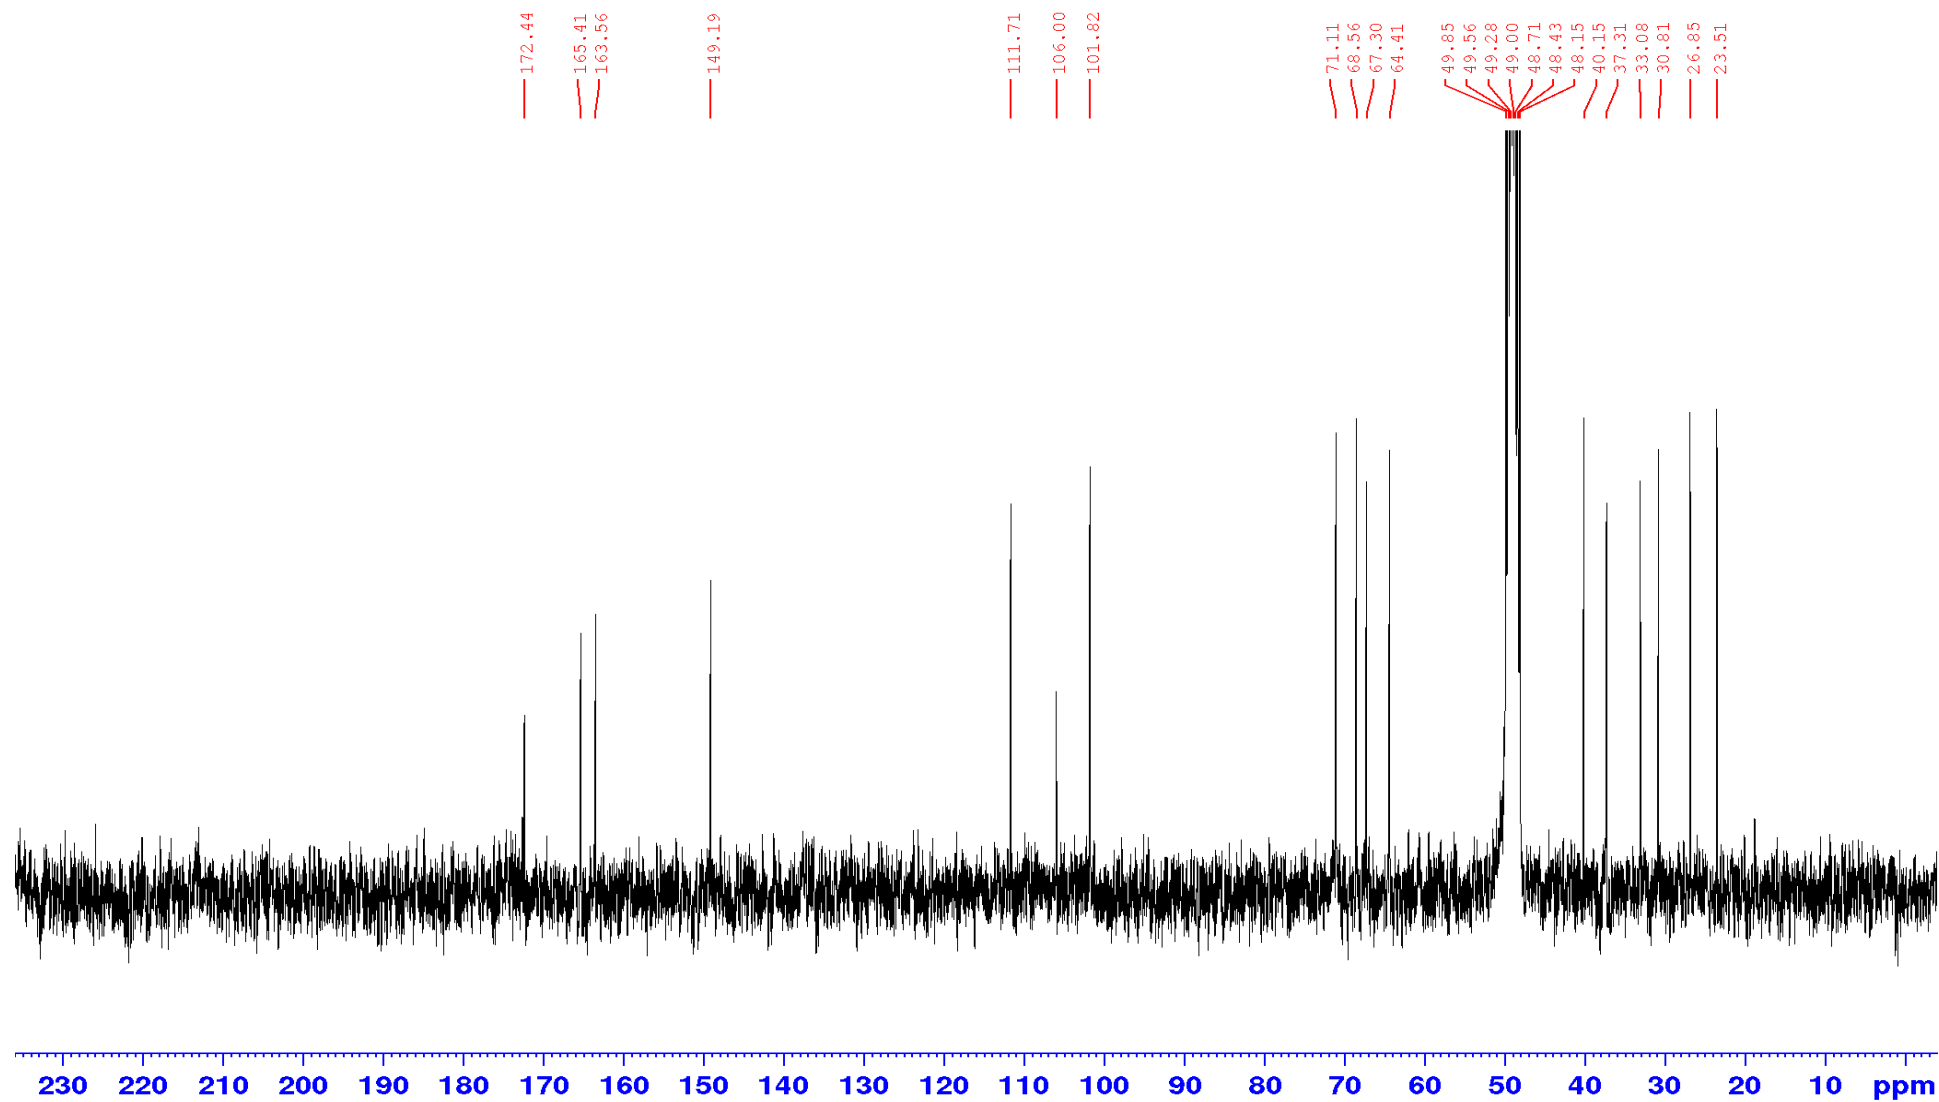



Figure S18. DEPT-135 spectrum of 3 measured at 75 MHz in MeOD

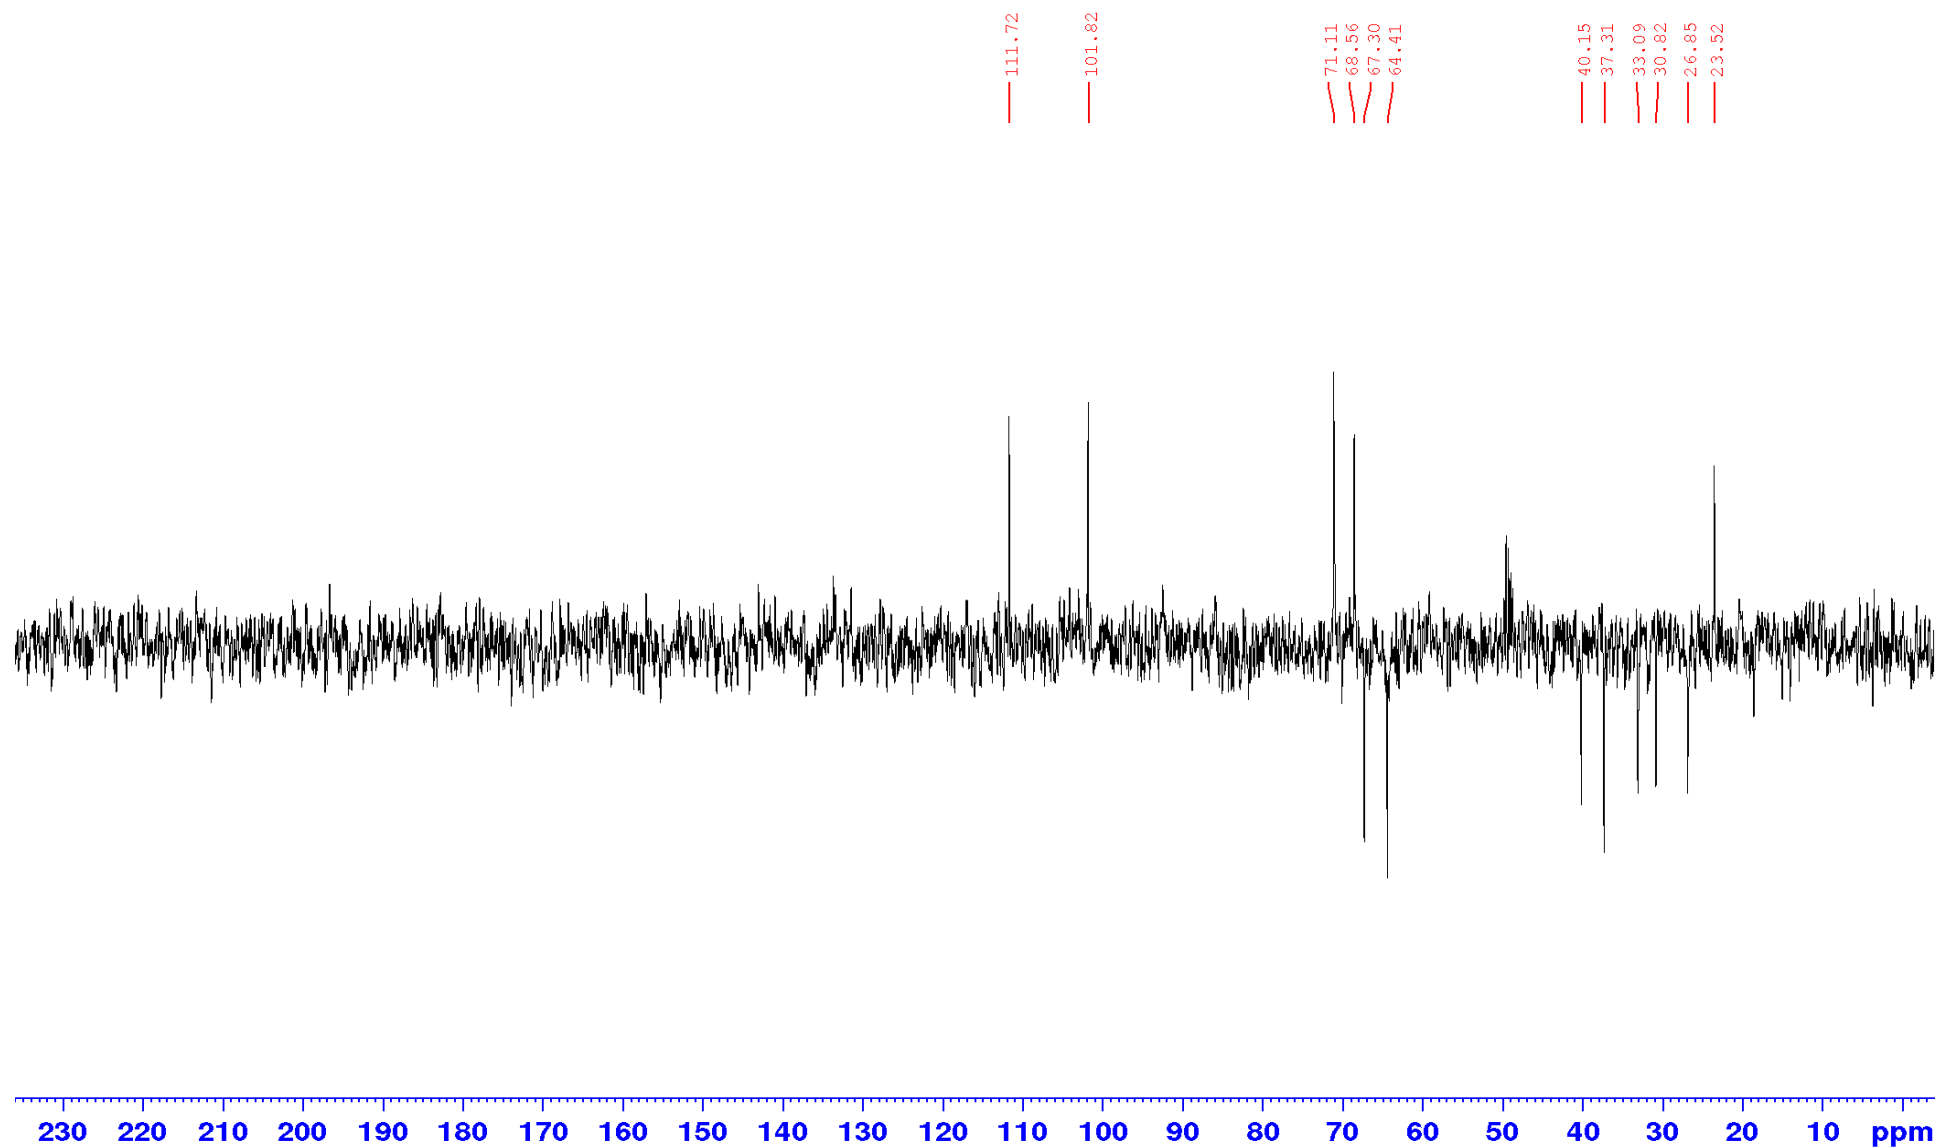

Figure S19. HSQC spectrum of 3 measured in MeOD

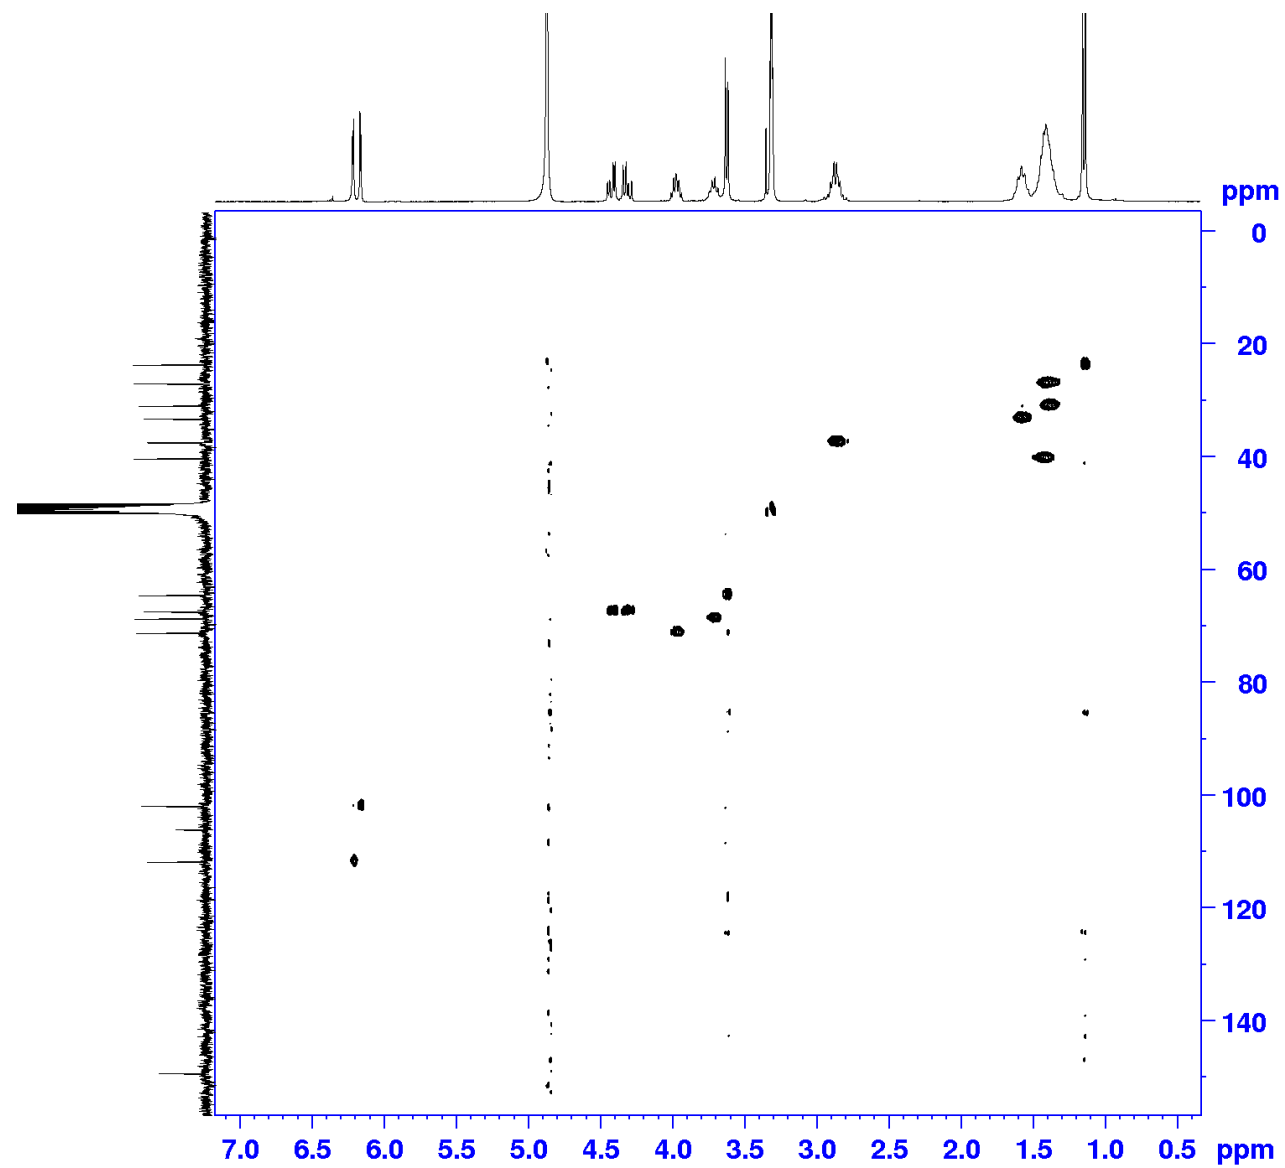

Figure S20. COSY spectrum of 3 measured in MeOD

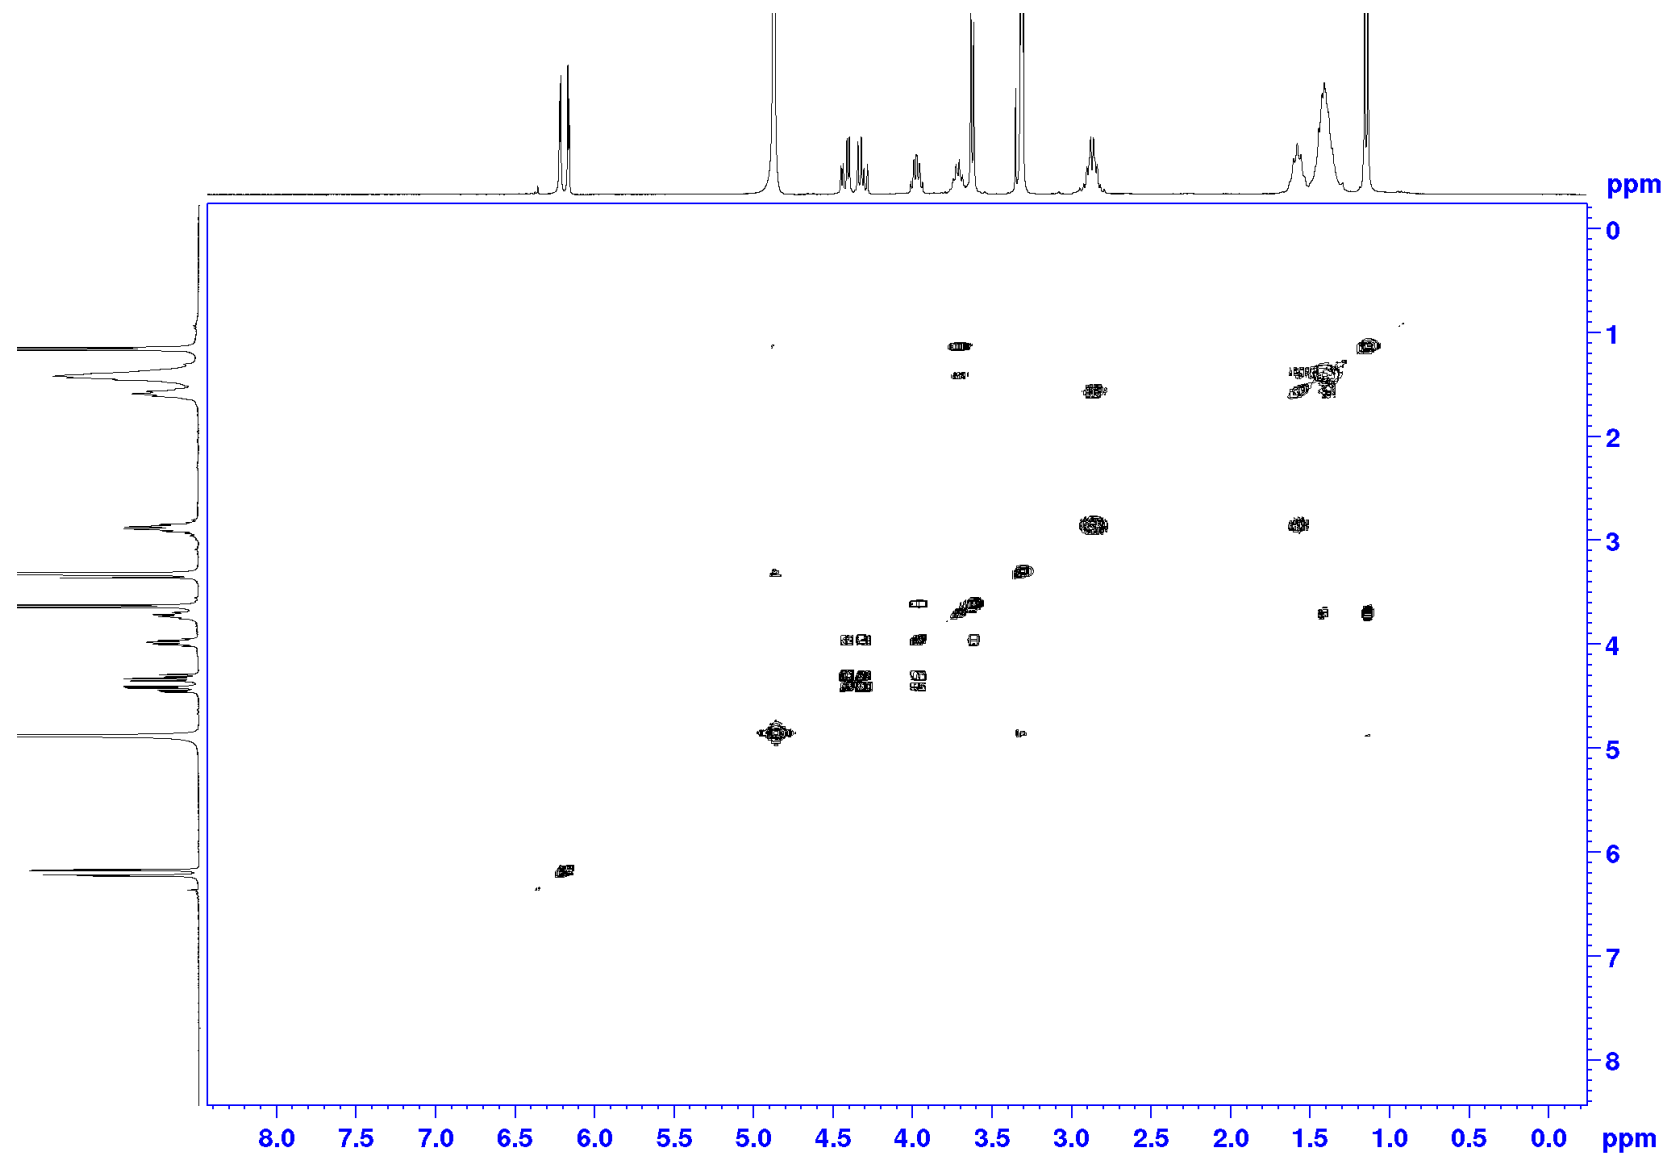

Figure S21. HMBC spectrum of 3 measured in MeOD

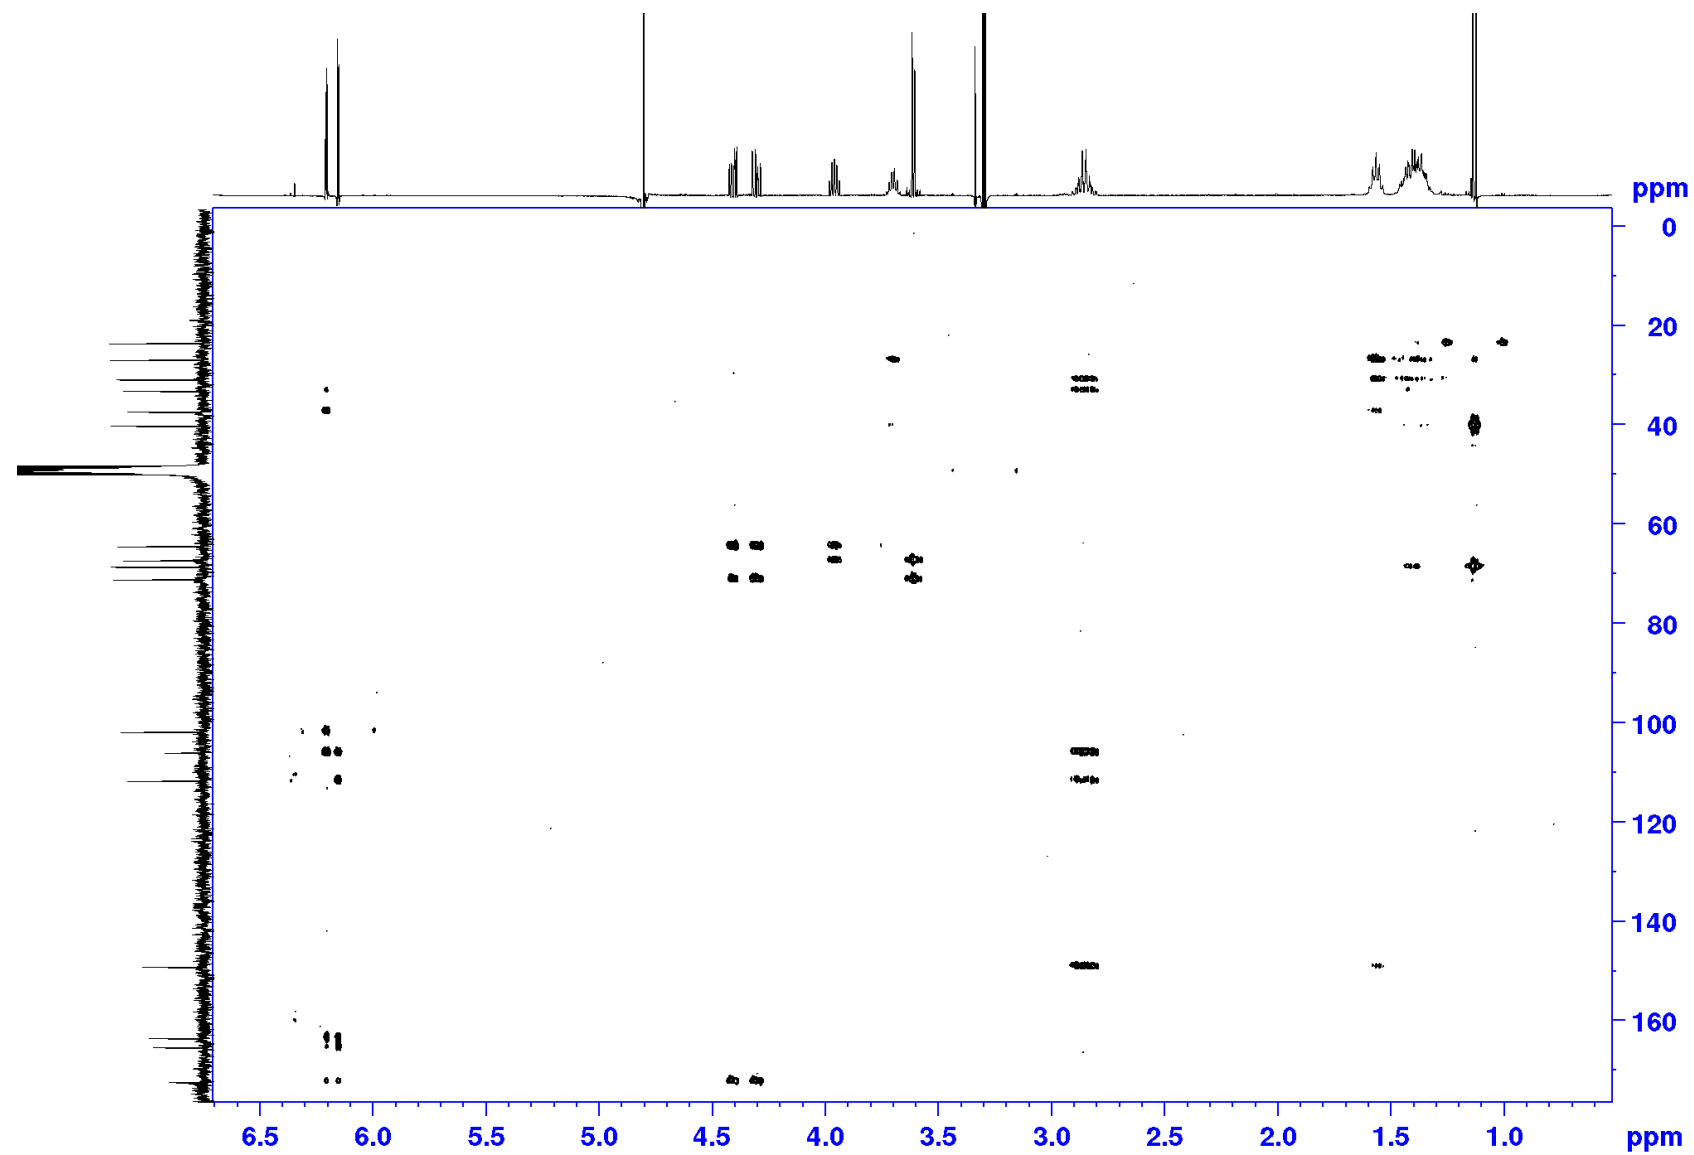

**Figure S22. HRESIMS for 4**

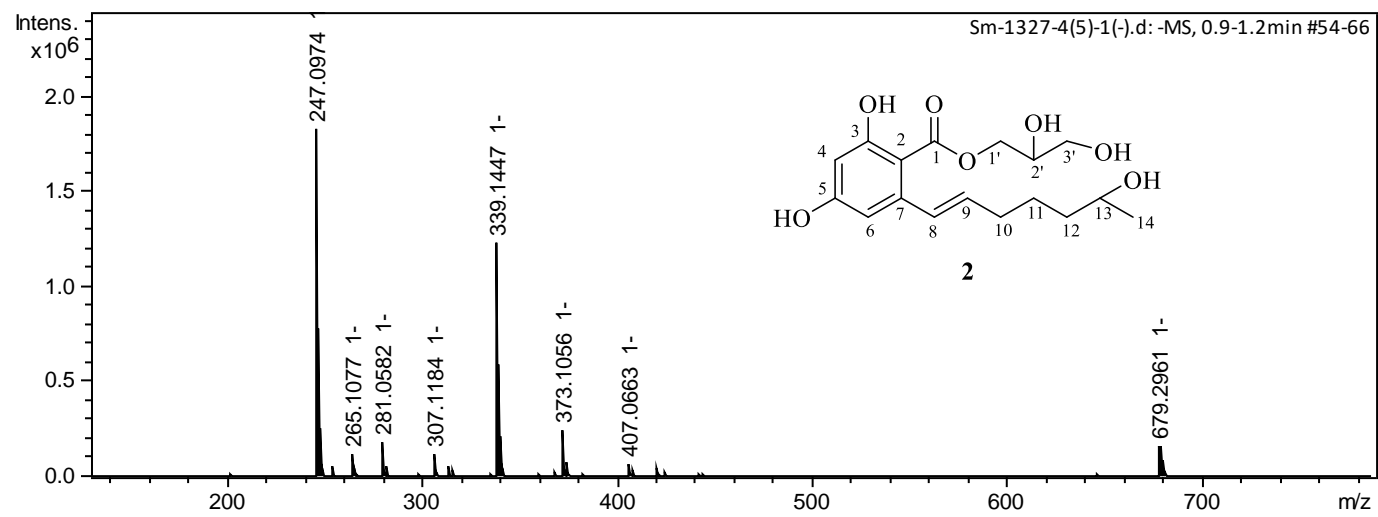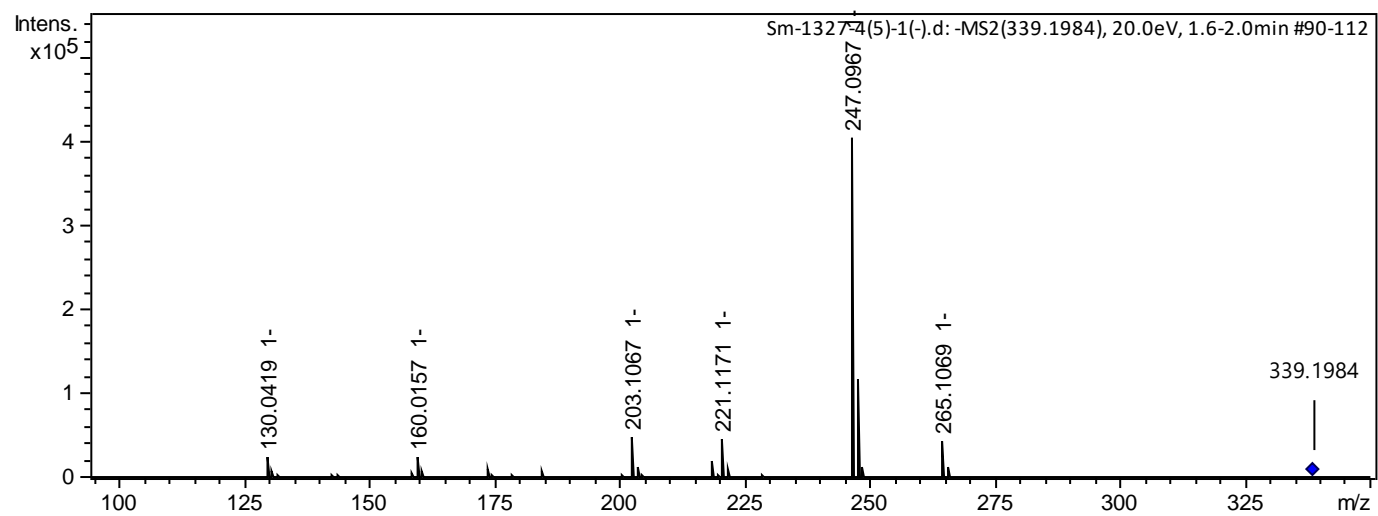

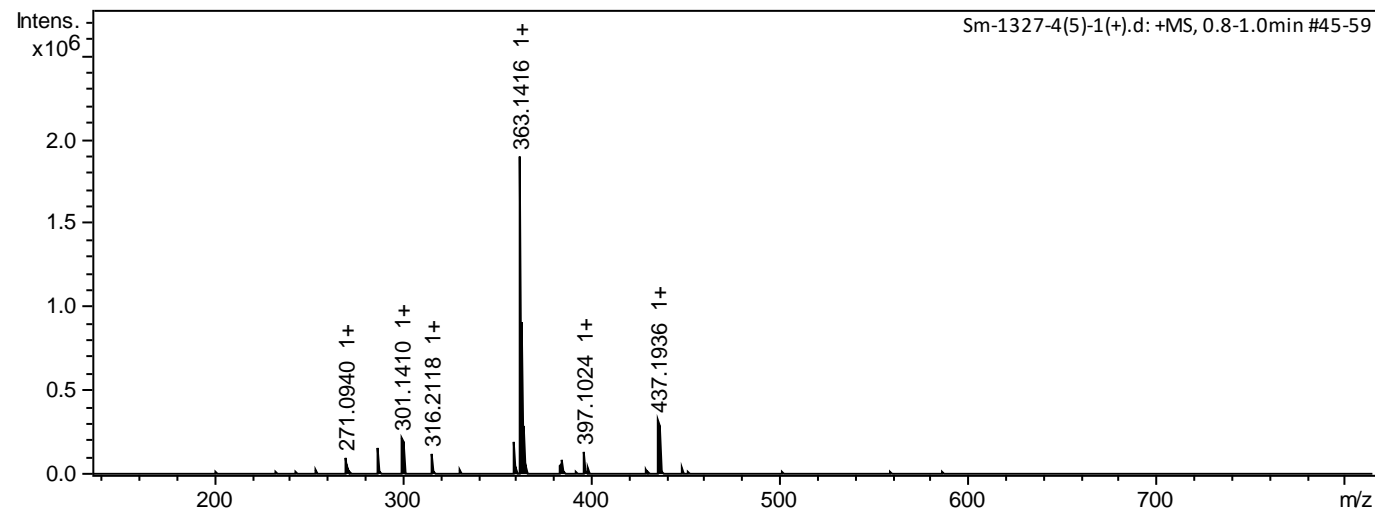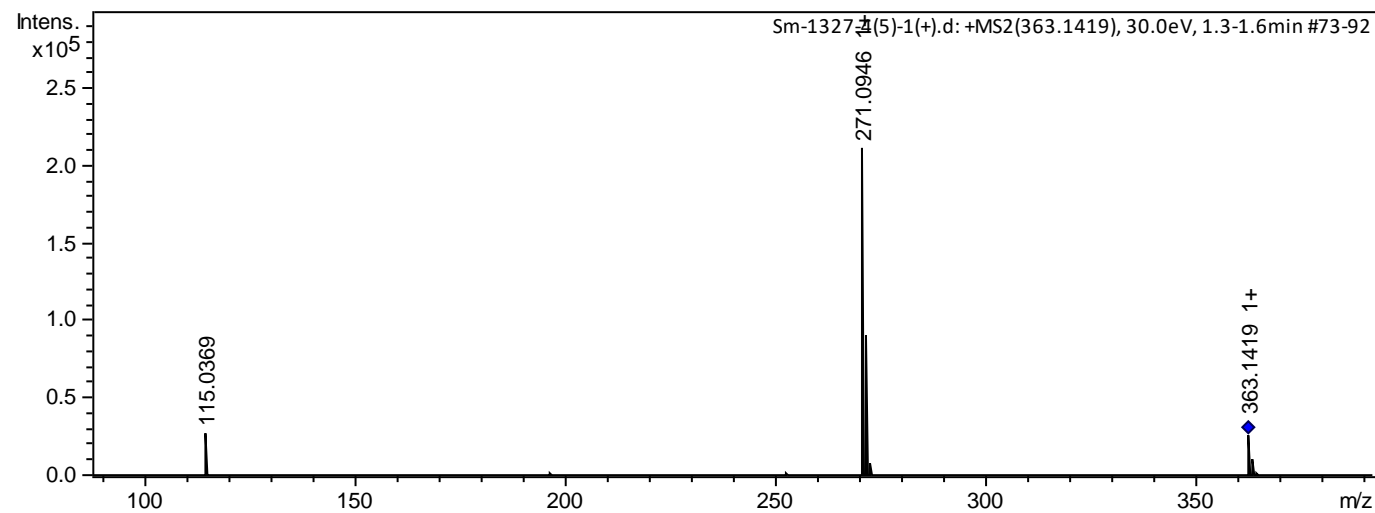

|                     | meas     | calc     | $\Delta$<br>(ppm) |
|---------------------|----------|----------|-------------------|
| [M-H] <sup>-</sup>  | 339,1447 | 339,1449 | 0,6               |
| [M+Na] <sup>+</sup> | 363,1416 | 363,1414 | -0,5              |

Figure S23.  $^1\text{H}$  NMR spectrum of **4** measured at 500 MHz in MeOD

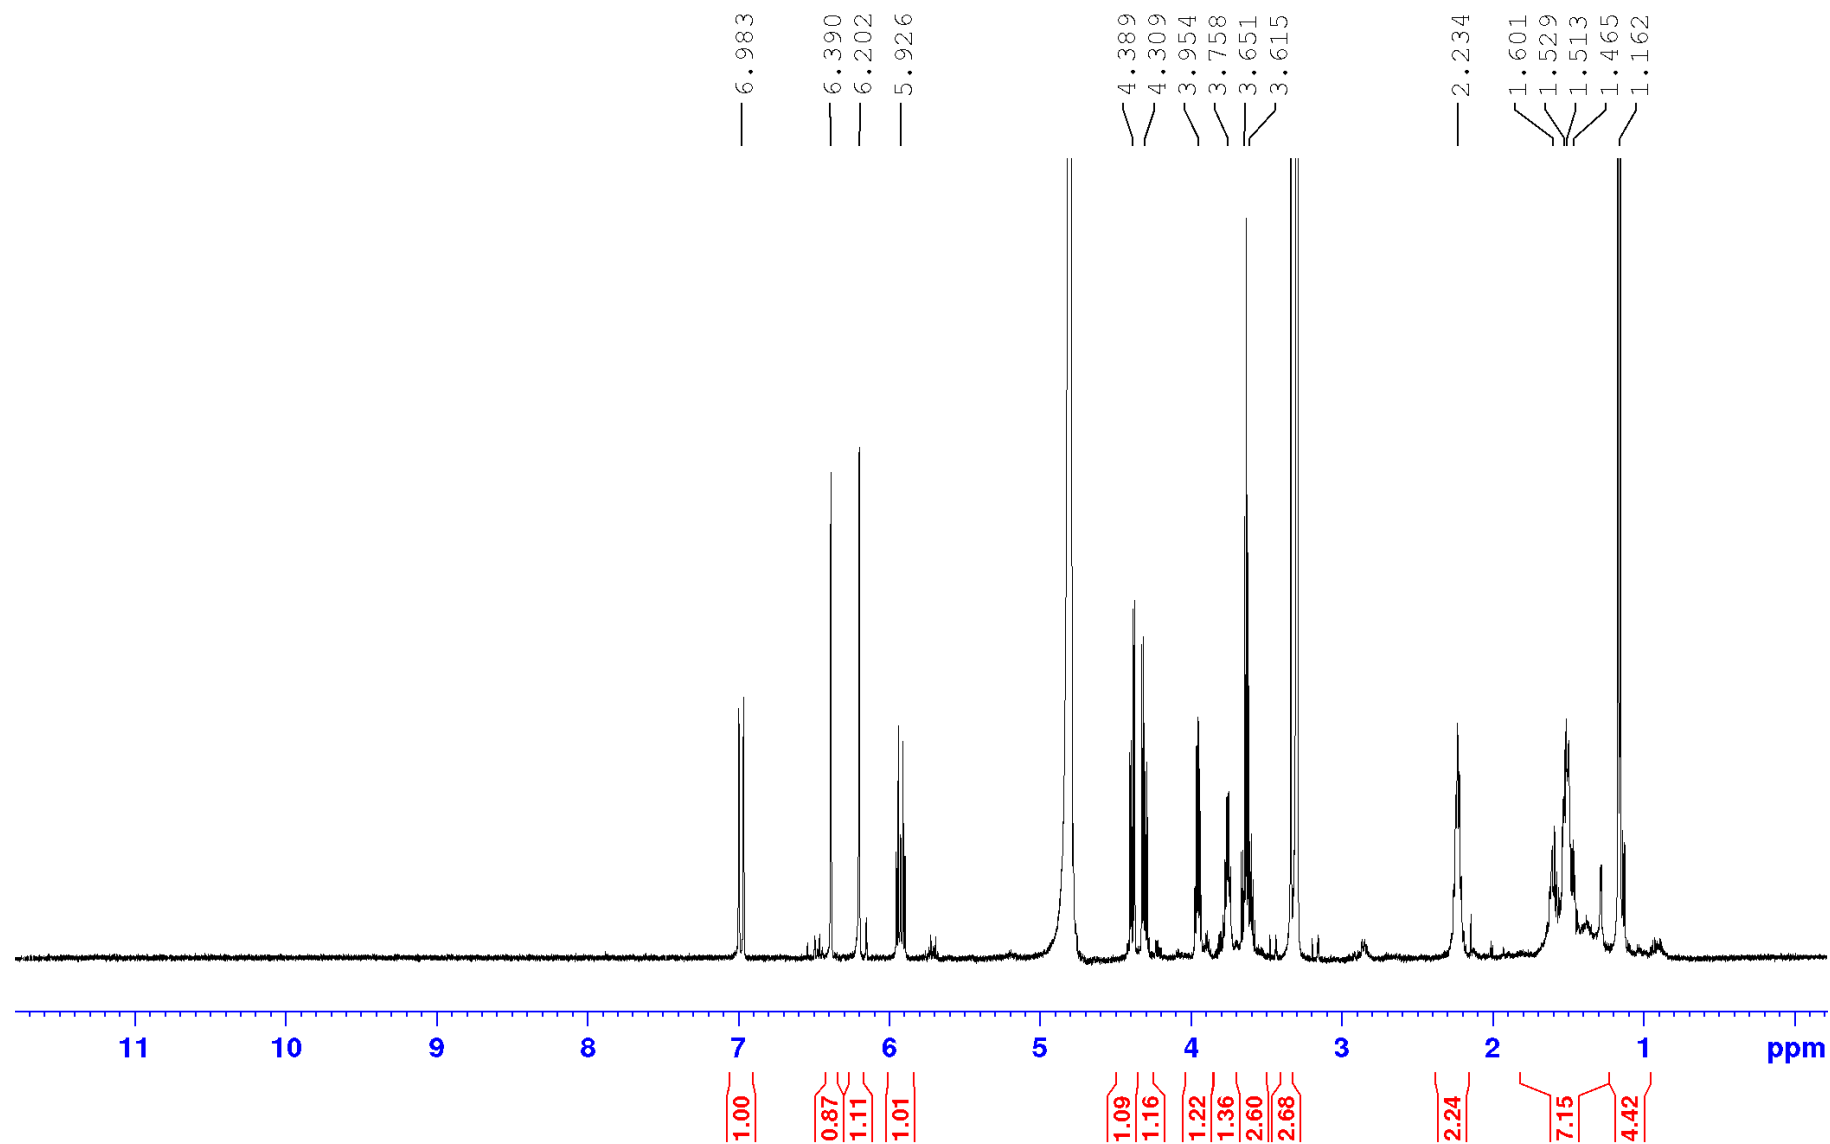

Figure S23.  $^{13}\text{C}$  NMR spectrum of **4** measured at 75 MHz in MeOD

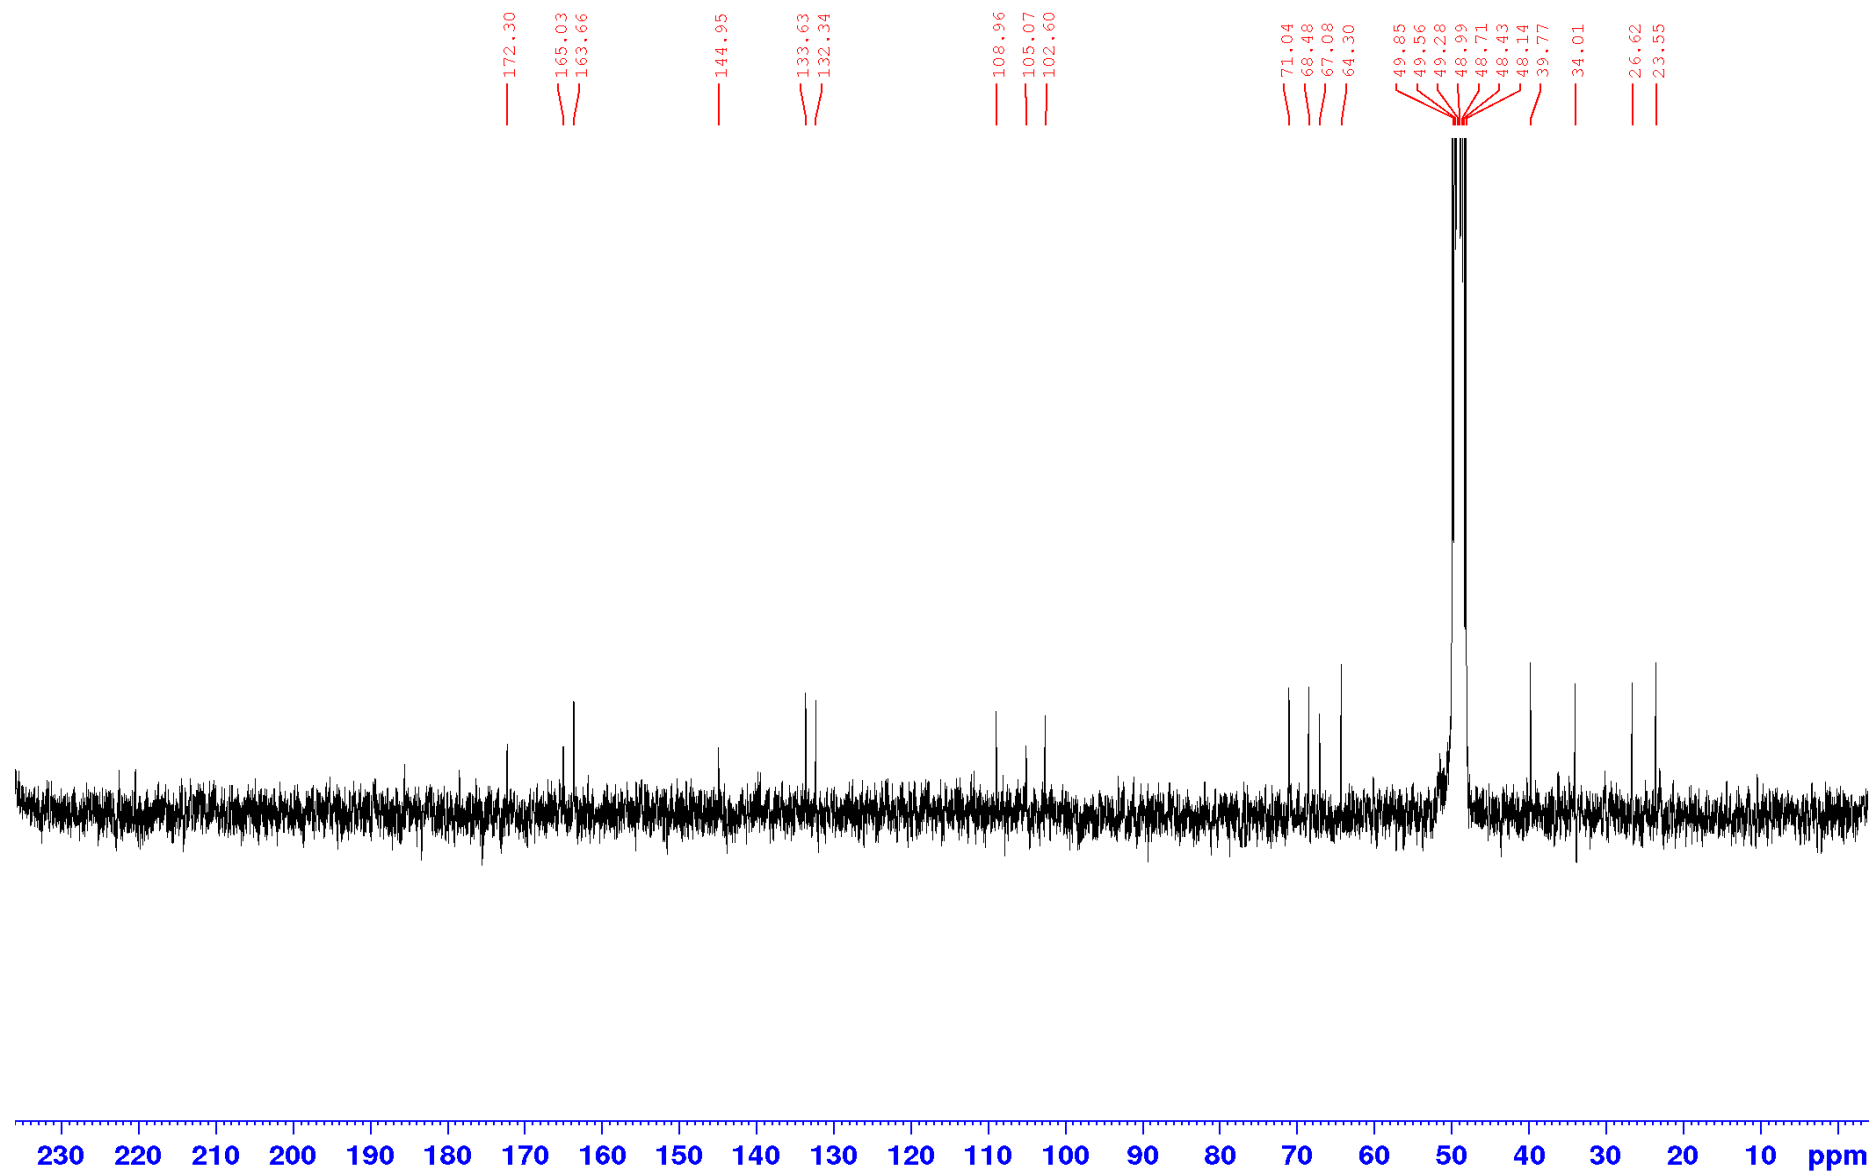



Figure S25.  $^{13}\text{C}$  NMR spectrum of **4** measured at 75 MHz in MeOD

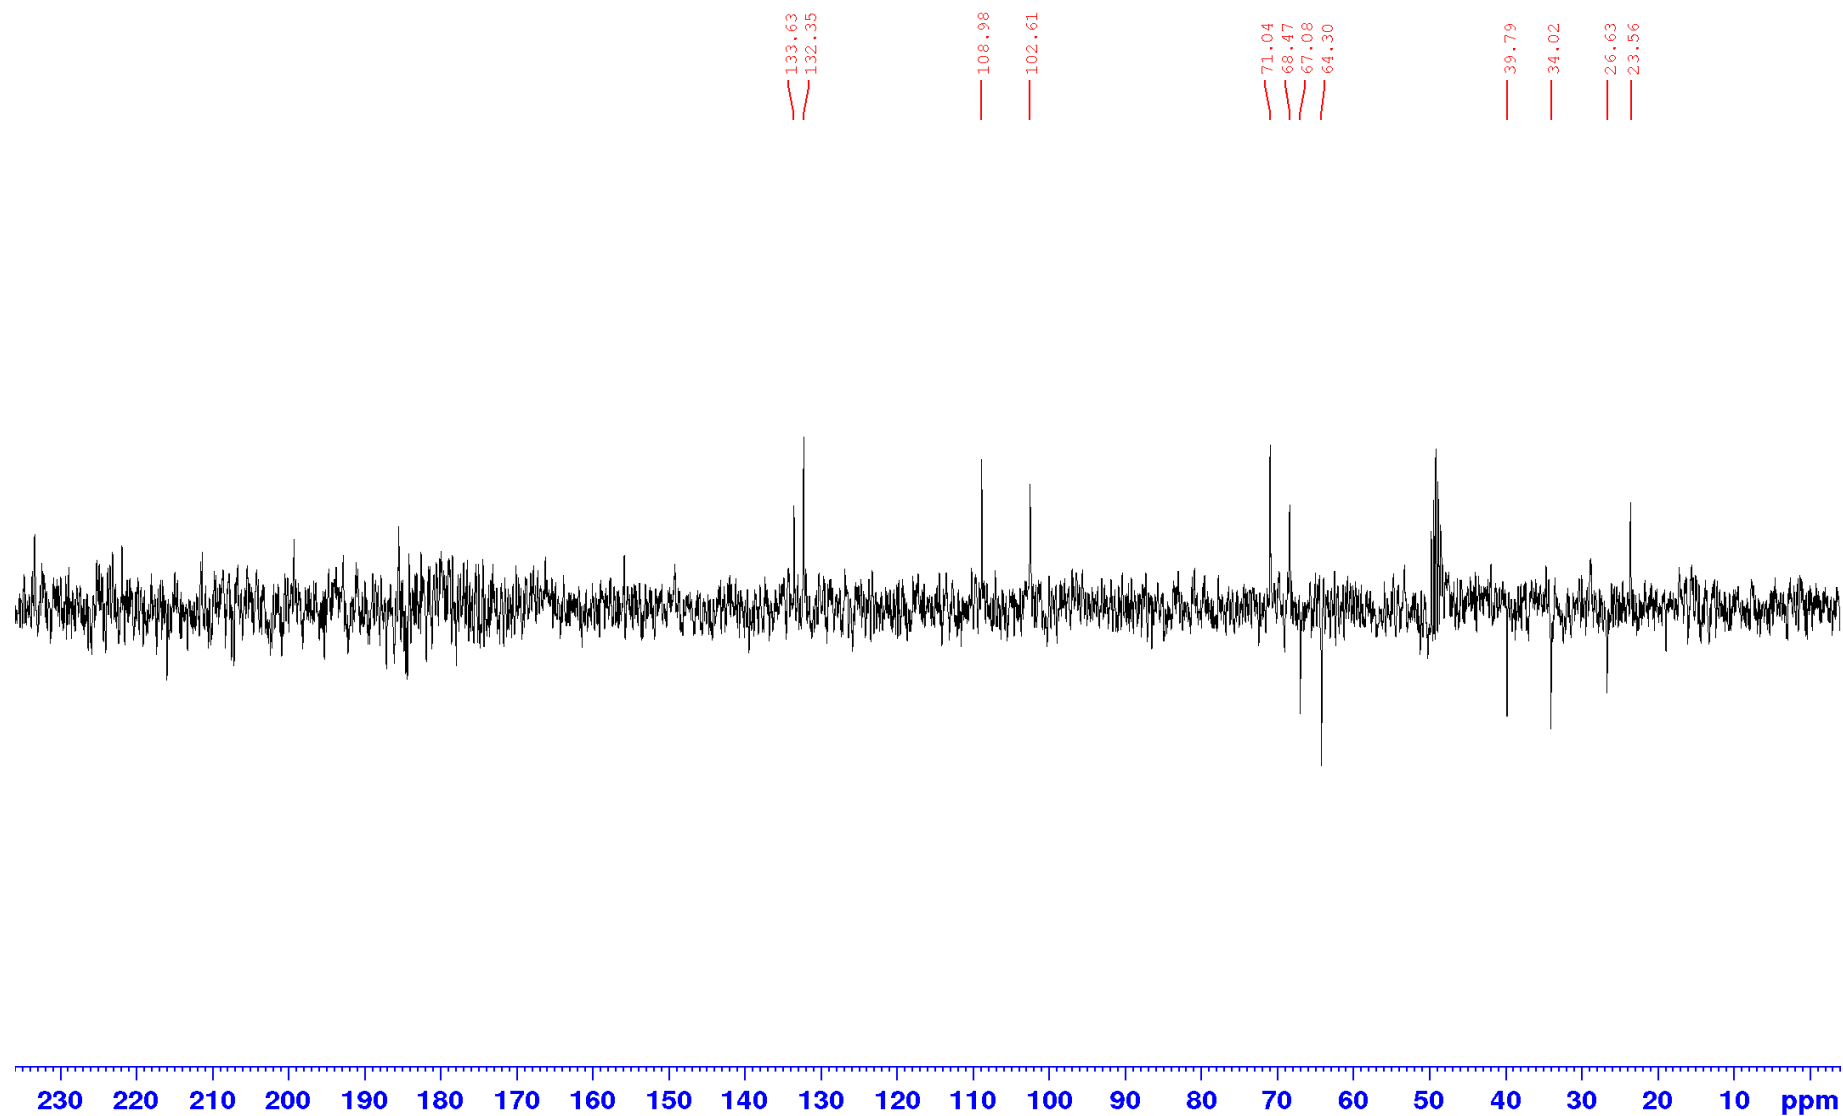

Figure S26. HSQC spectrum of 4 measured in MeOD

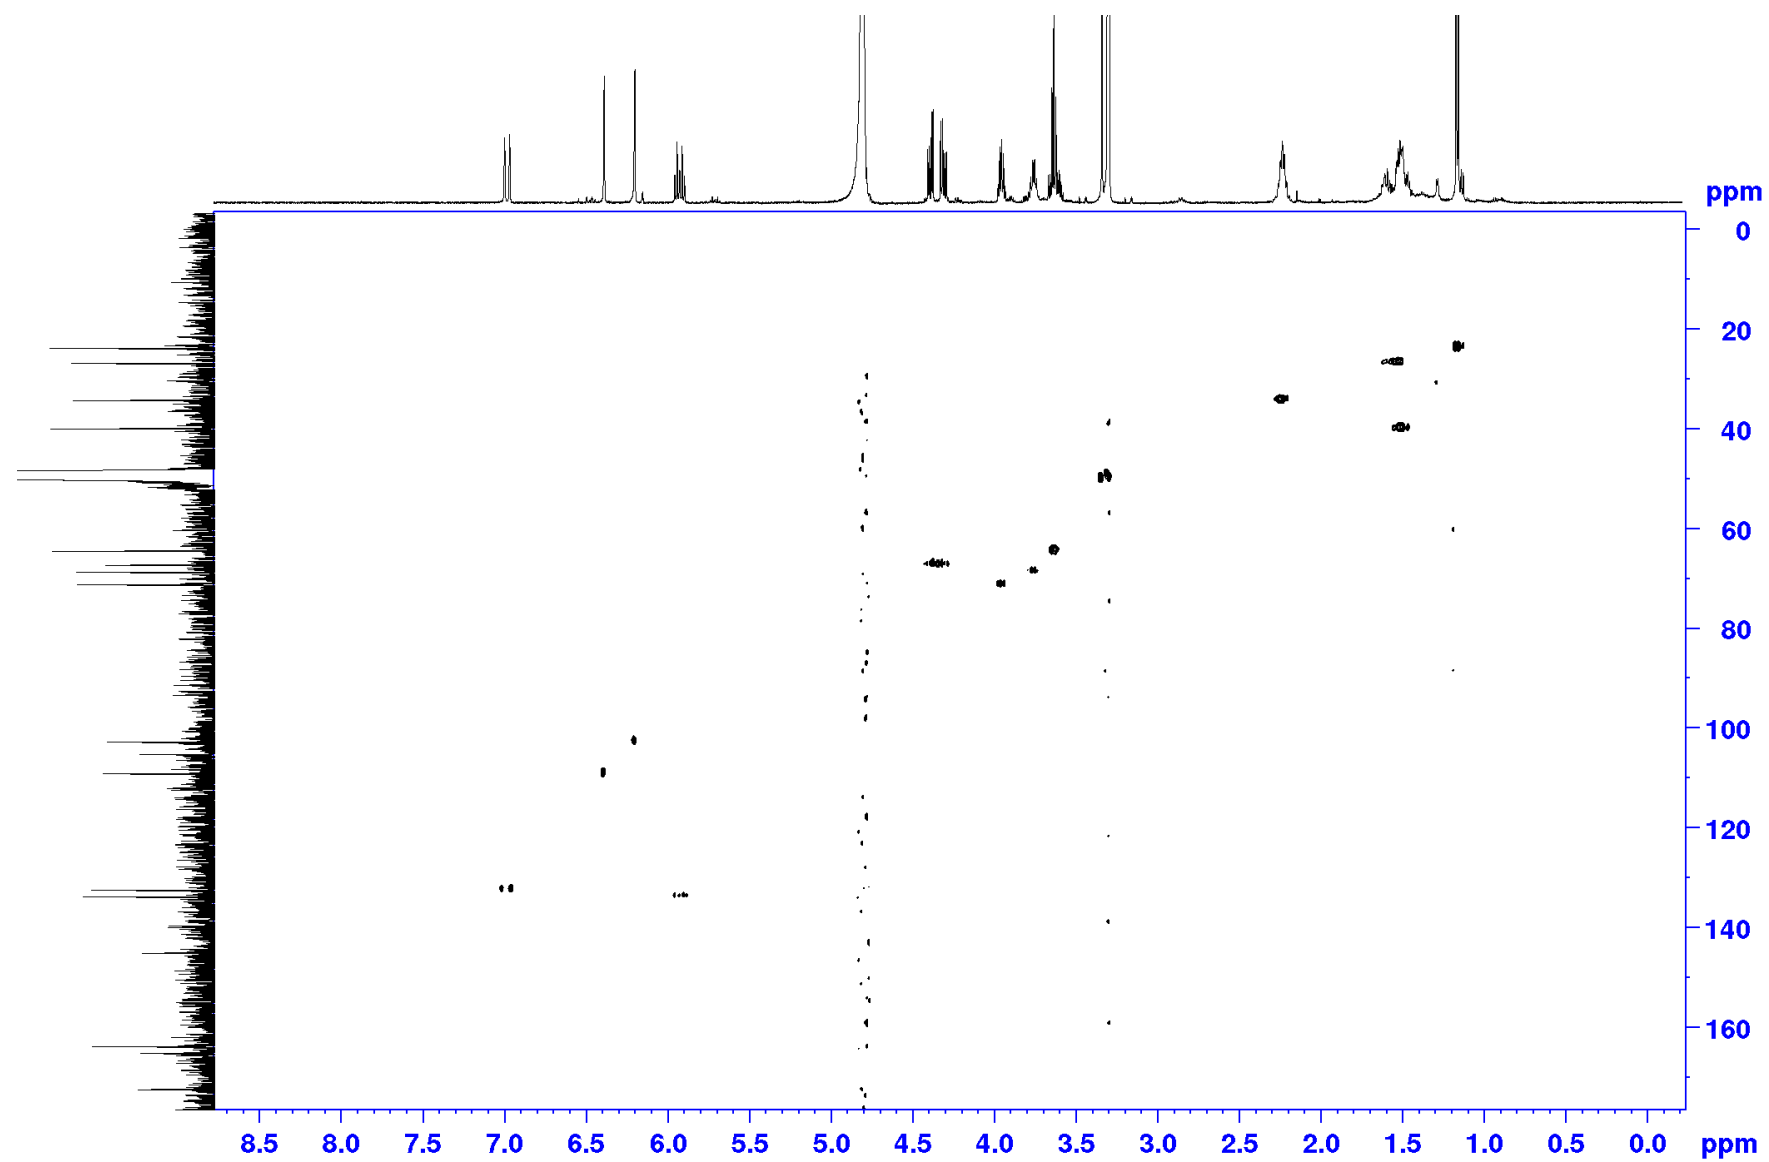

Figure S27. COSY spectrum of 4 measured in MeOD

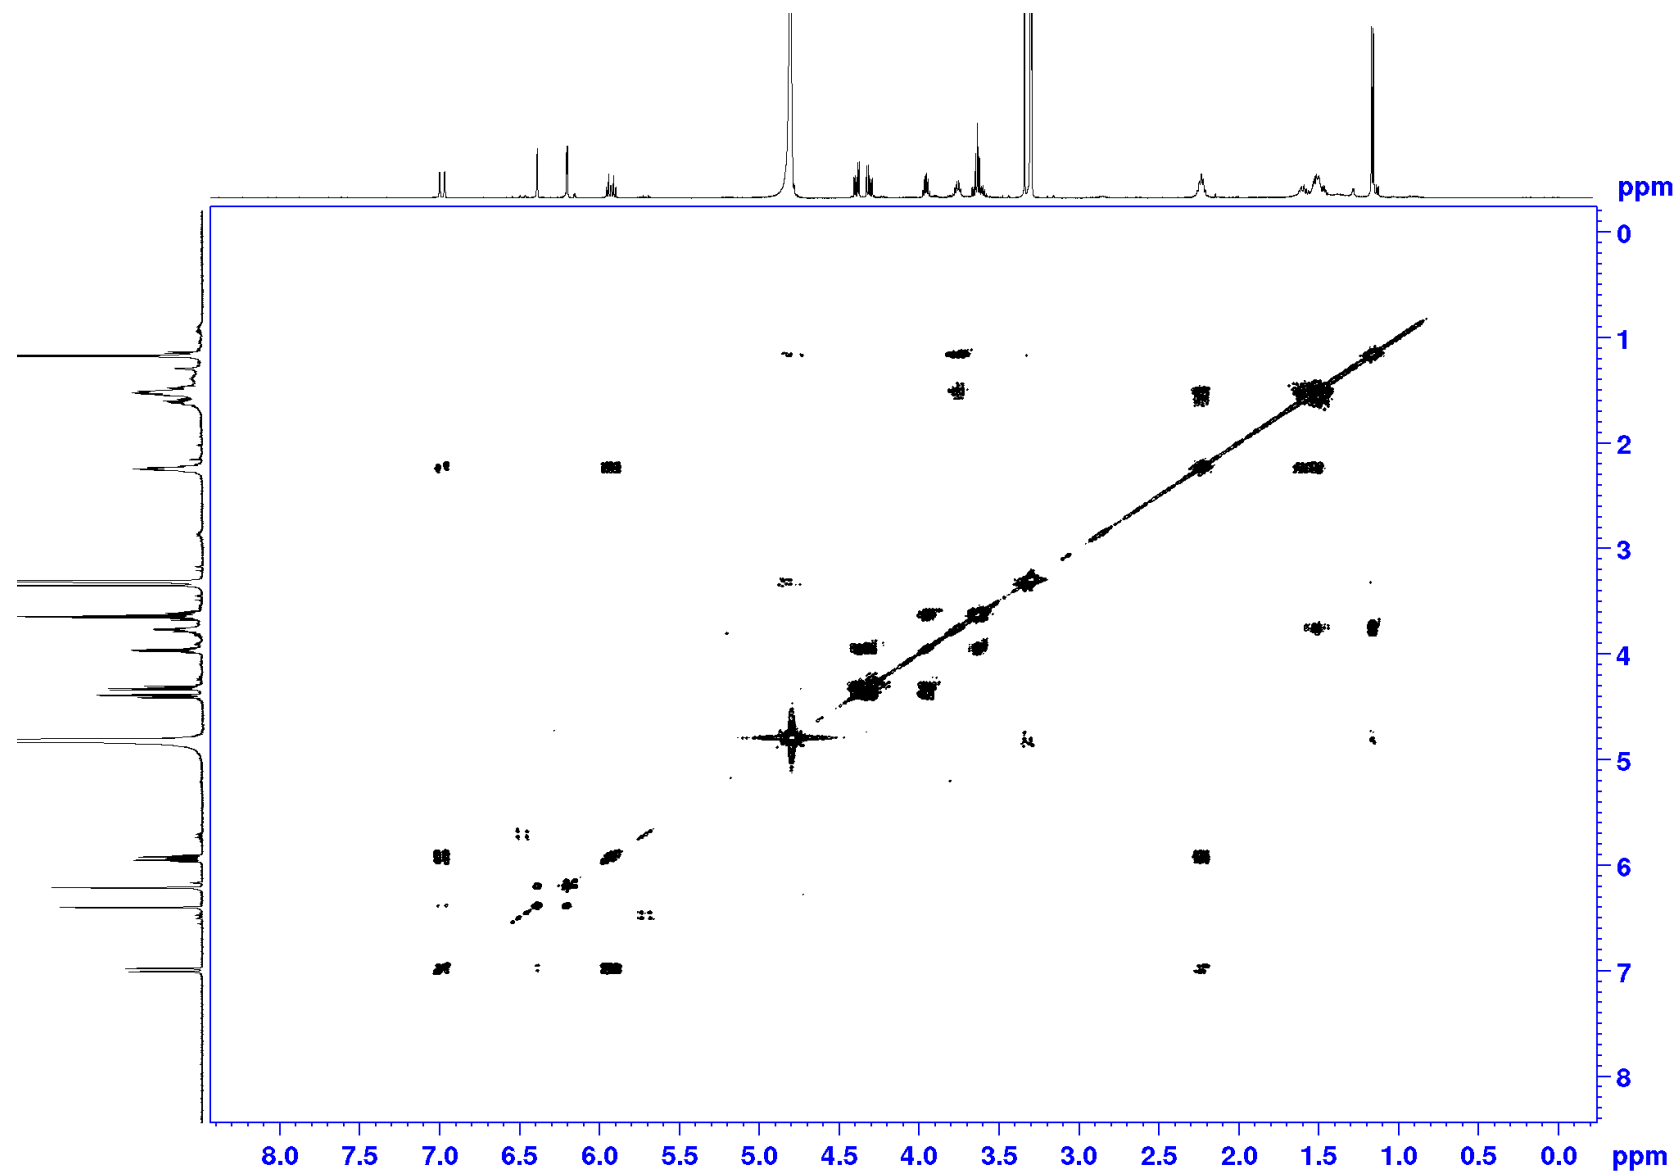

Figure S28. HMBC spectrum of 4 in MeOD

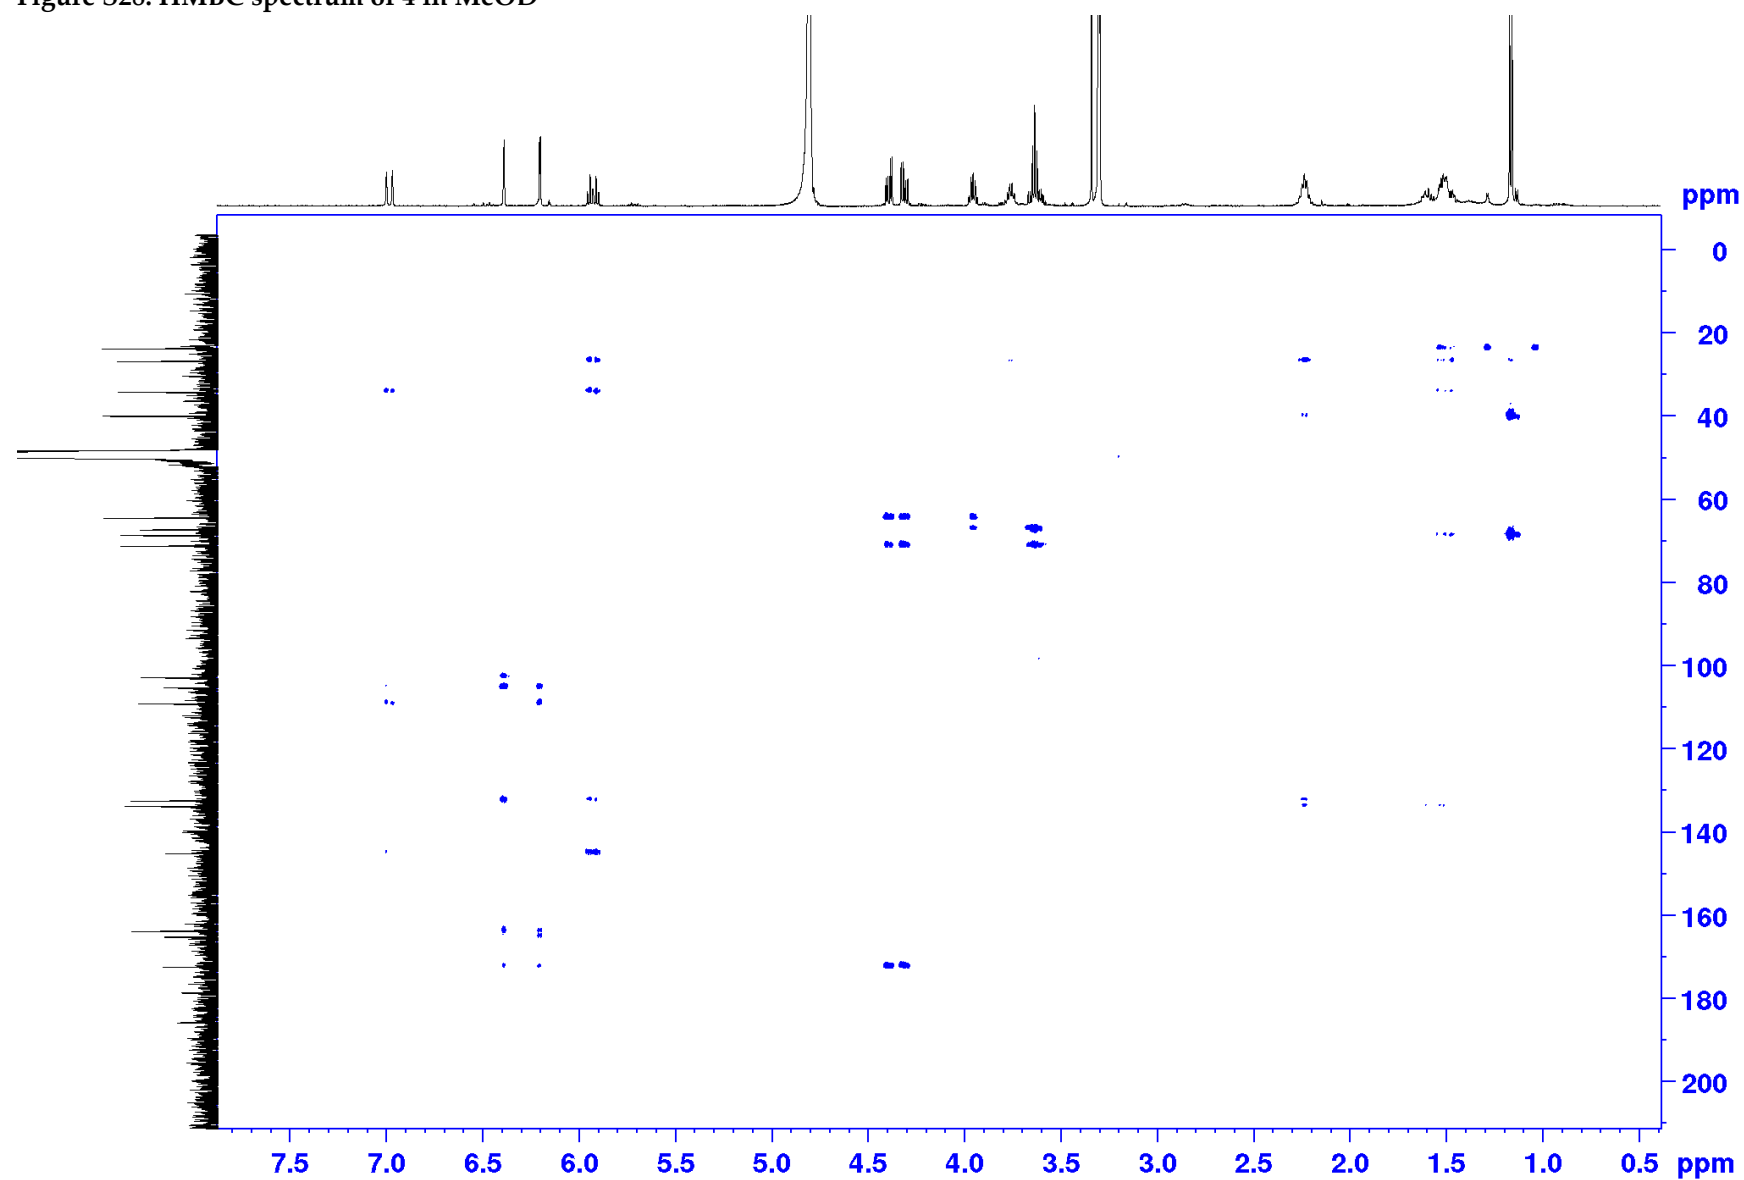

**Figure S29. HRESIMS for 5**

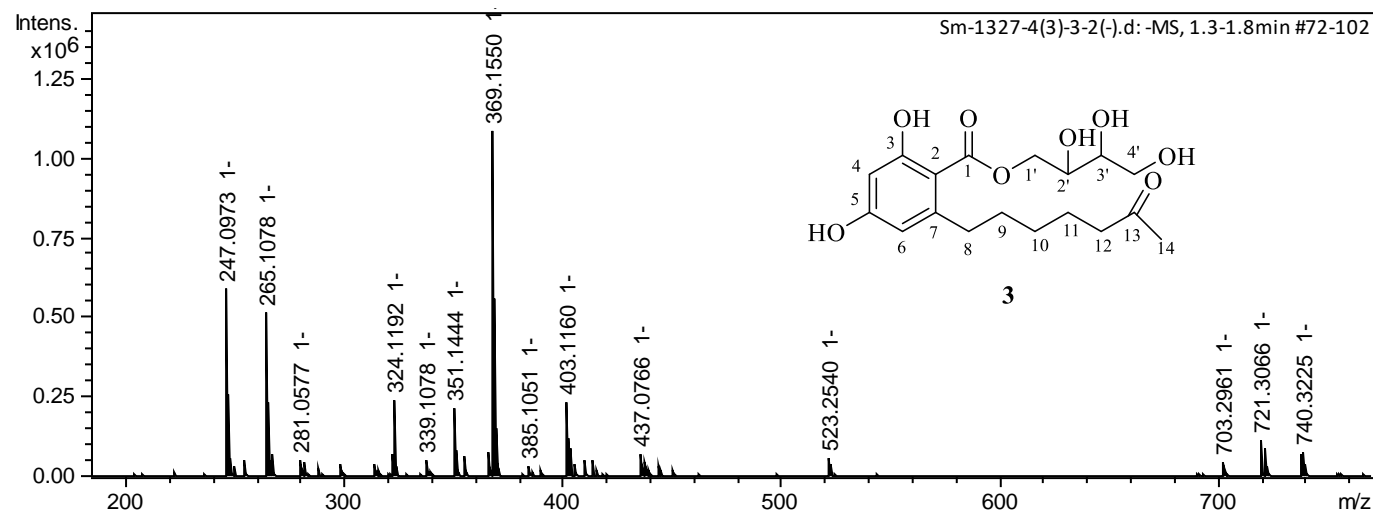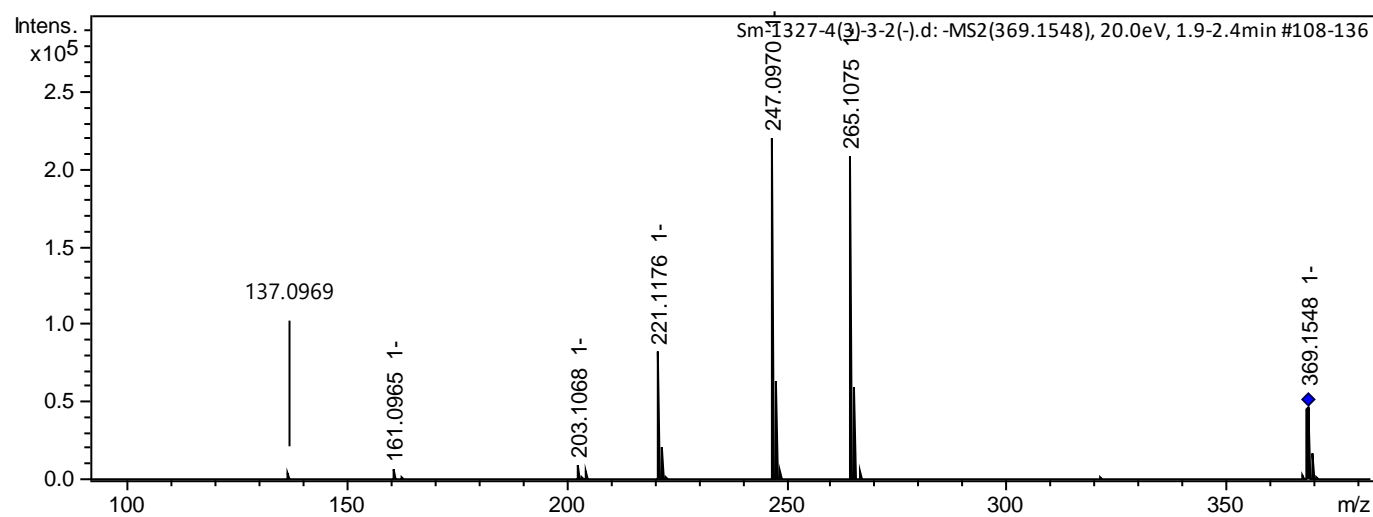

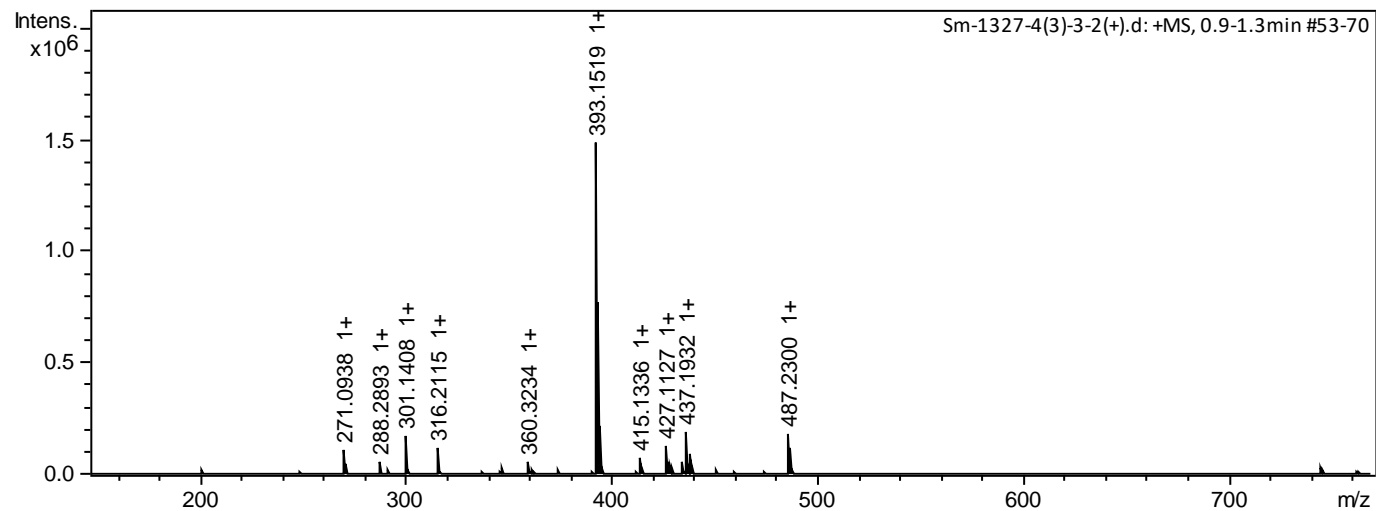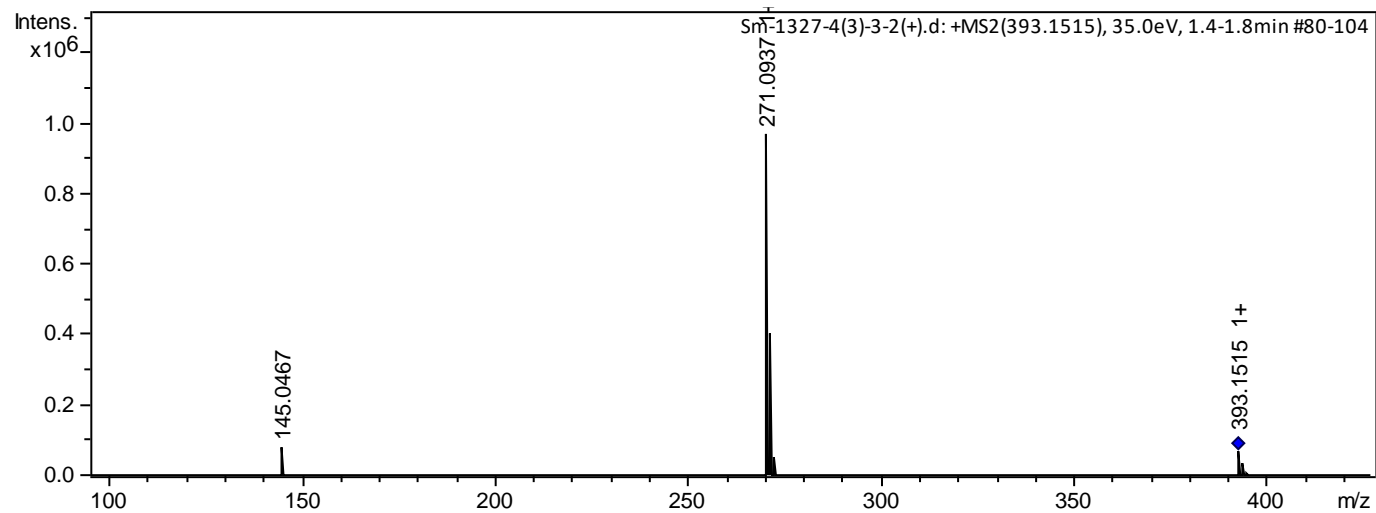

|                     | meas     | calc     | $\Delta$<br>(ppm) |
|---------------------|----------|----------|-------------------|
| [M-H] <sup>-</sup>  | 369,1550 | 369,1555 | 1,3               |
| [M+Na] <sup>+</sup> | 393,1519 | 393,152  | 0,3               |

Figure S30.  $^1\text{H}$  NMR spectrum of **5** measured at 500 MHz in MeOD

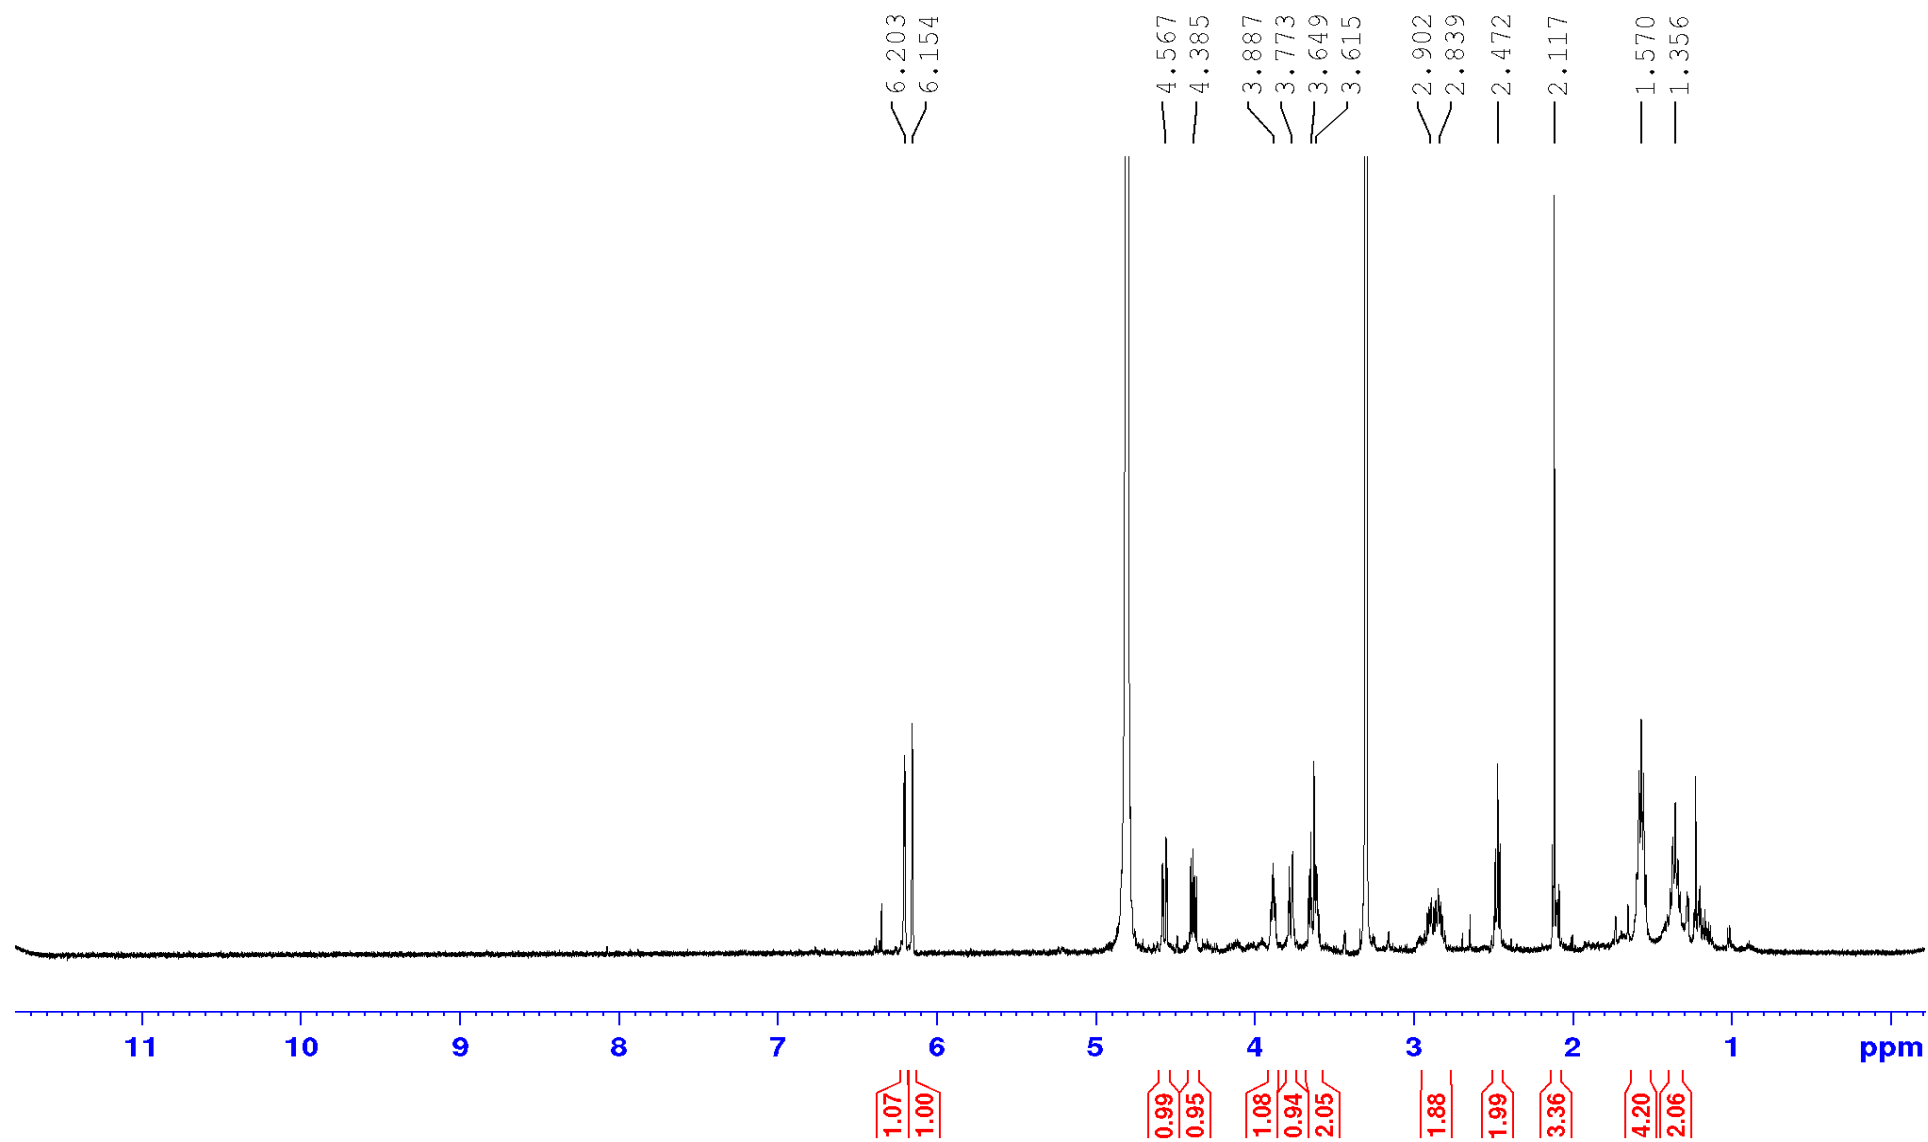

Figure S31.  $^{13}\text{C}$  NMR spectrum of **5** measured at 125 MHz in MeOD

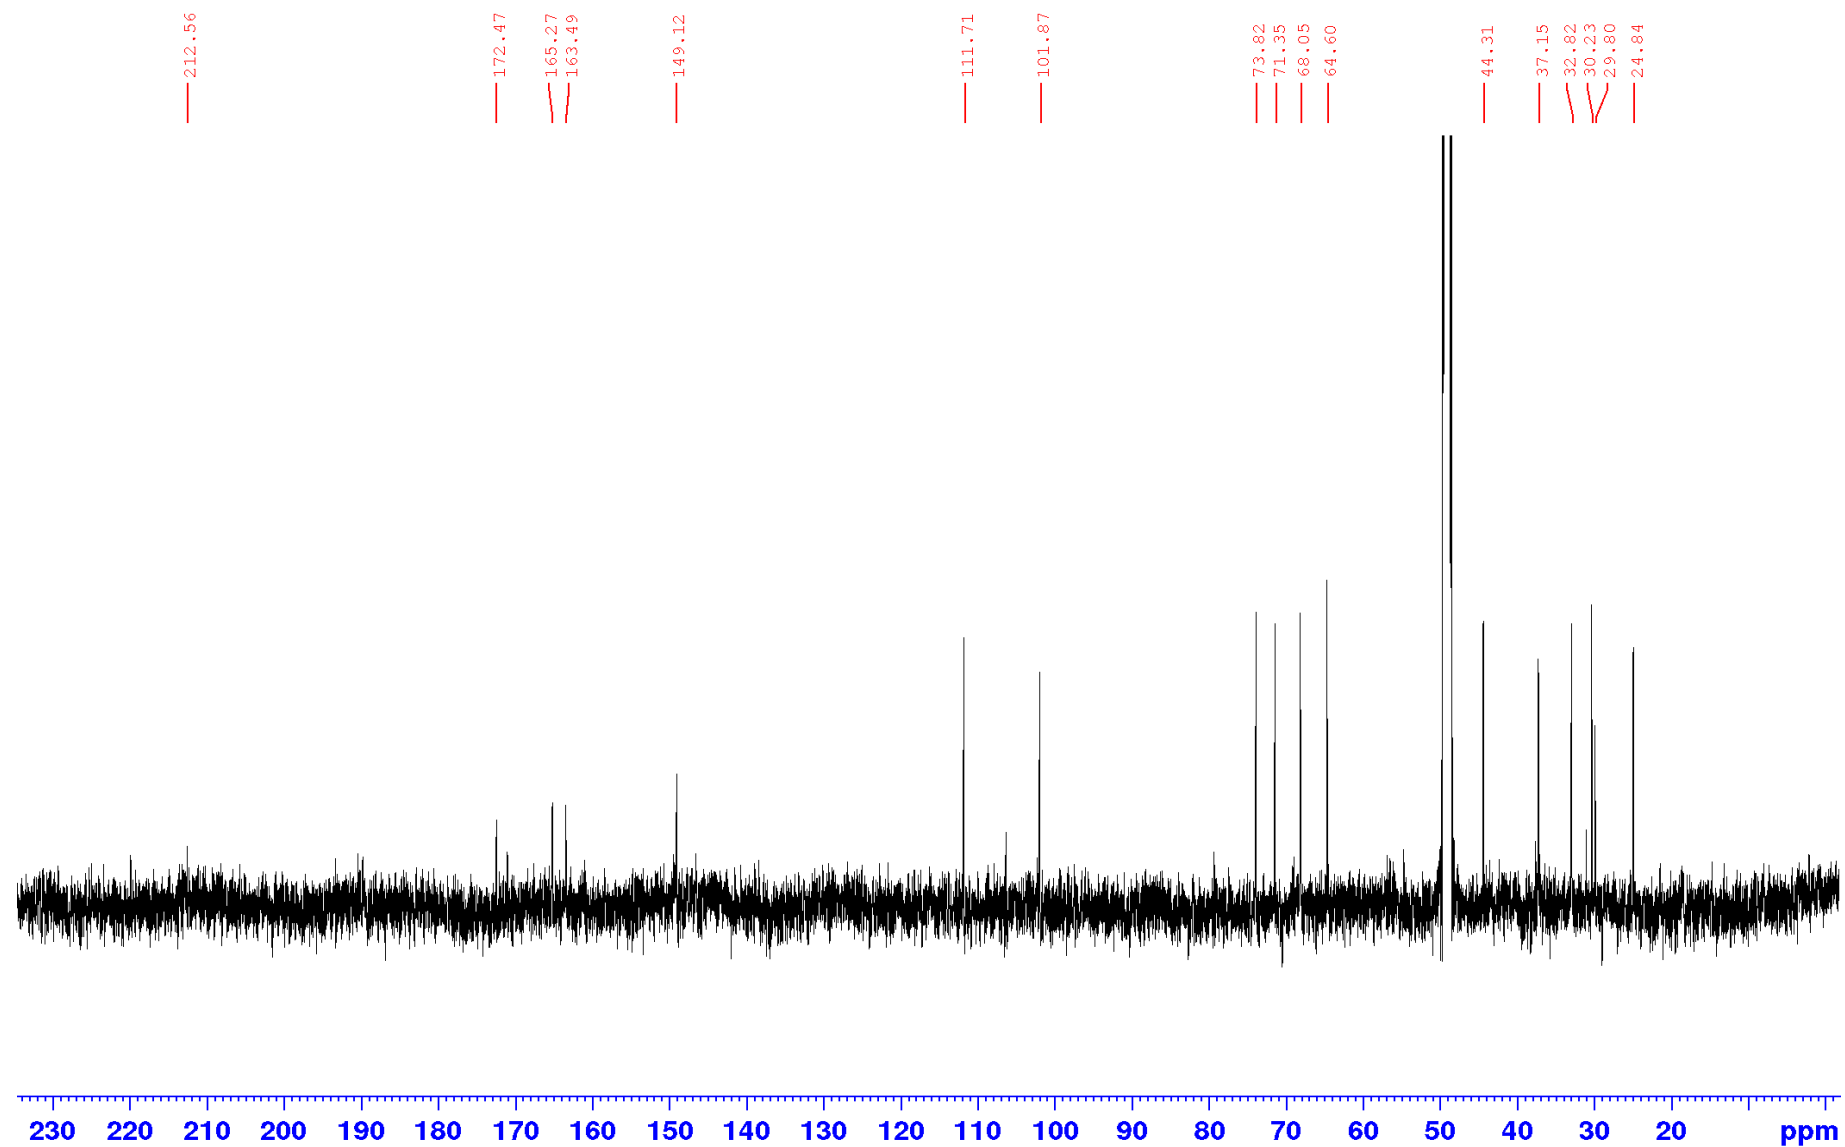



Figure S32. DEPT spectrum of 5 measured at 125 MHz in MeOD

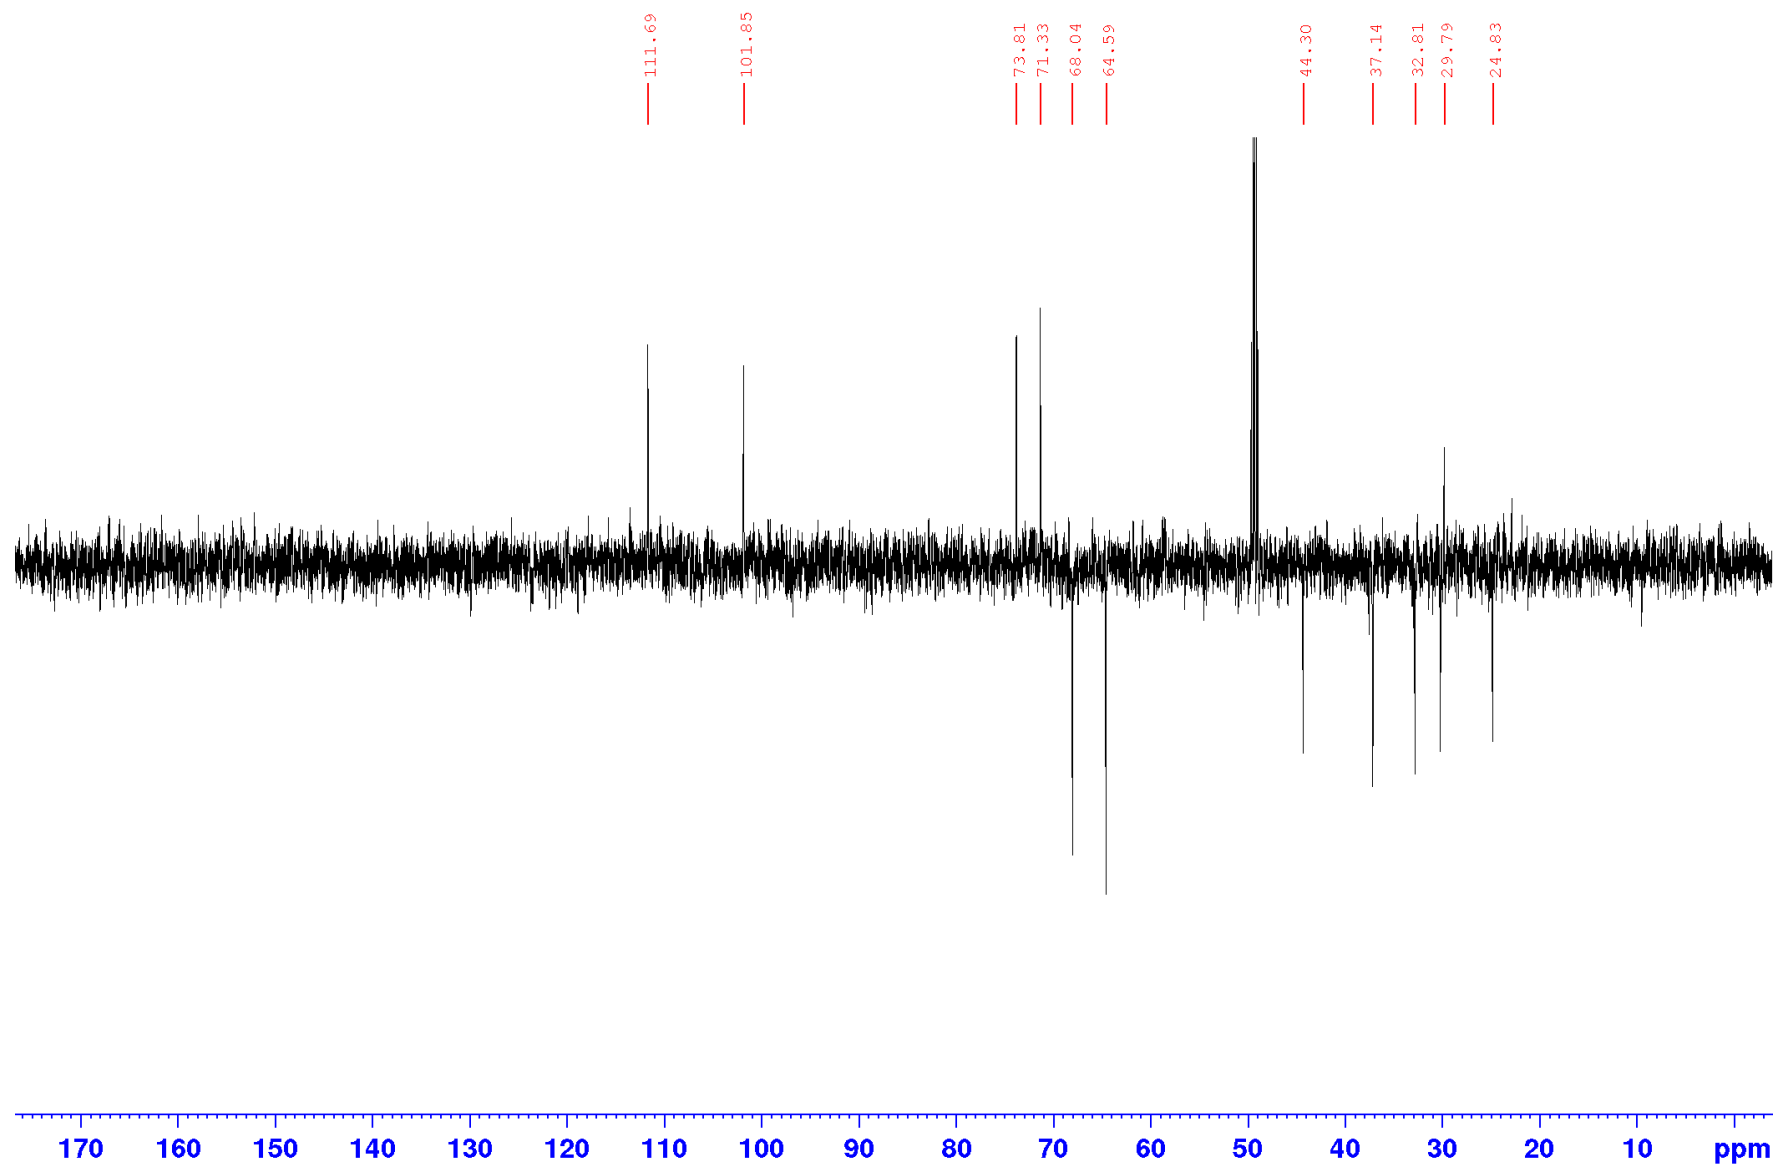

Figure S33. HSQC spectrum of 5 measured in MeOD

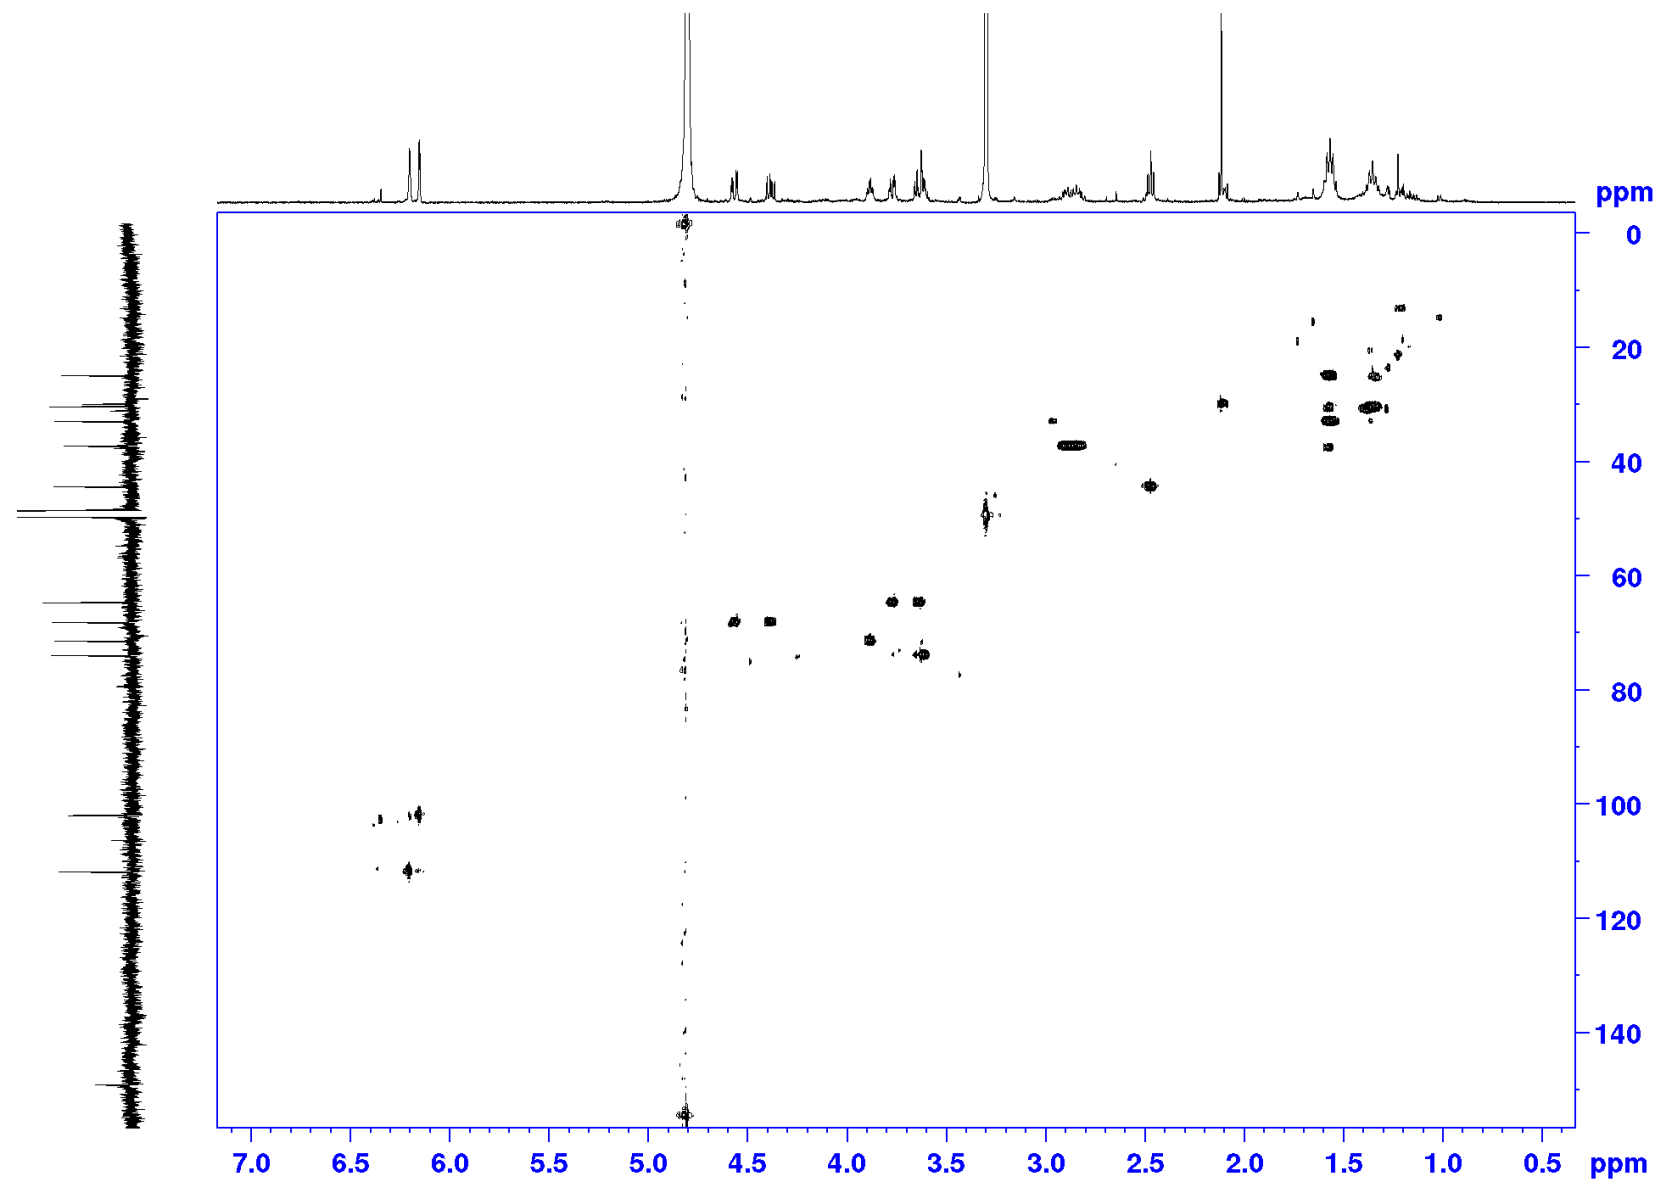

Figure S34. HMBC spectrum of 5 measured in MeOD

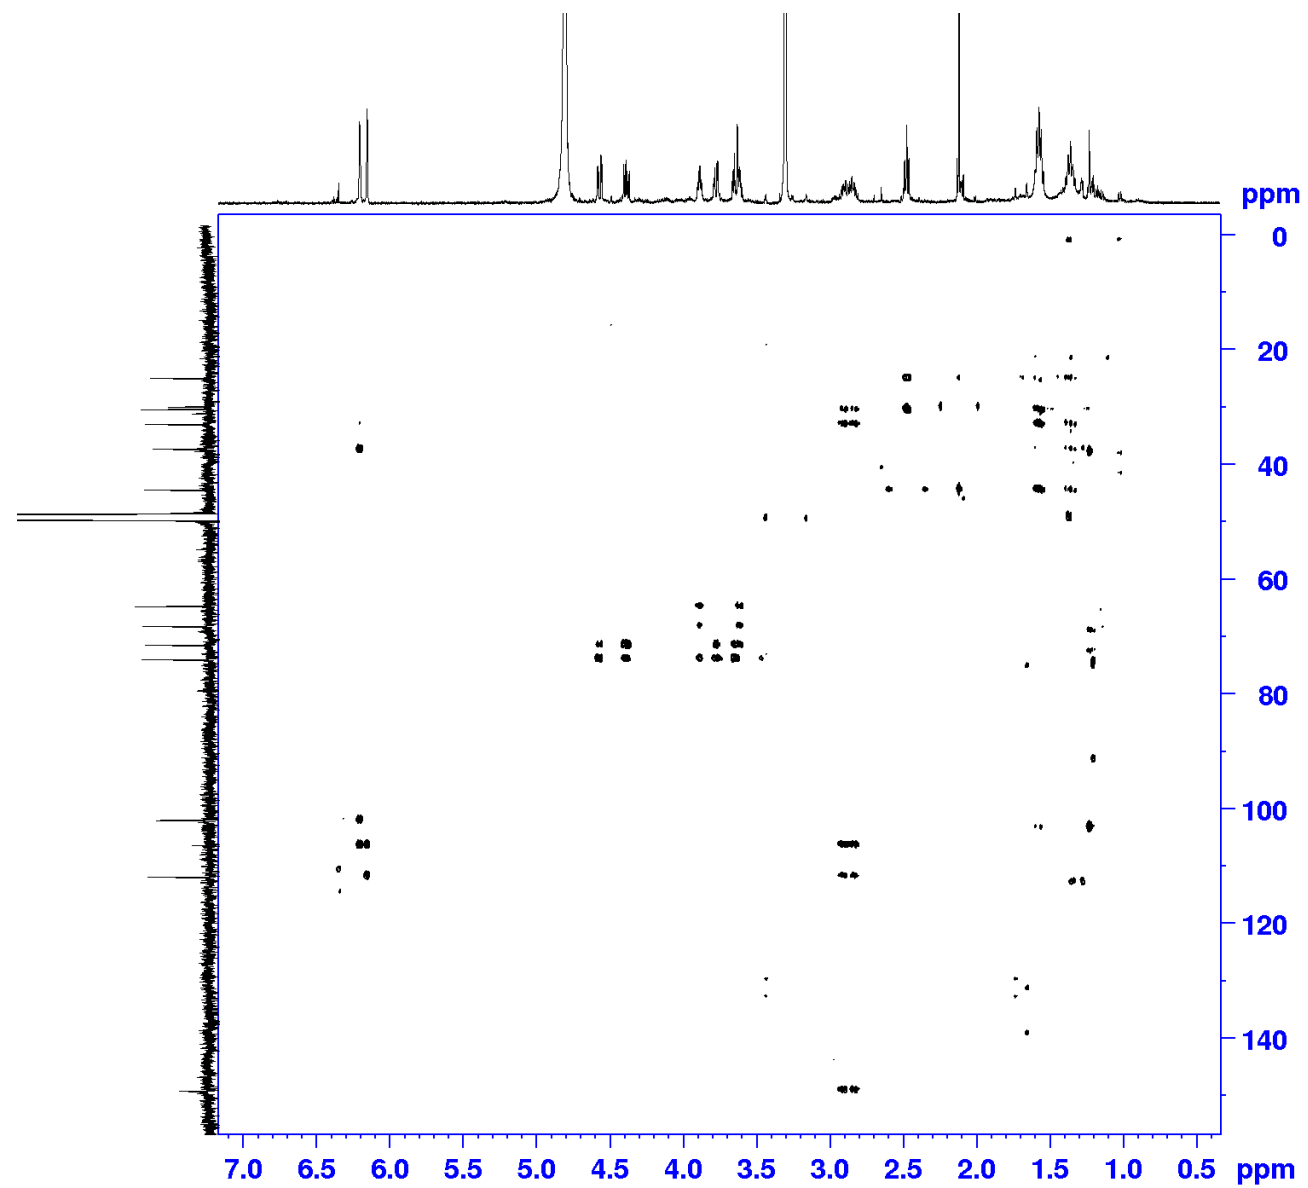

Figure S35. COSY spectrum of 5 measured in MeOD

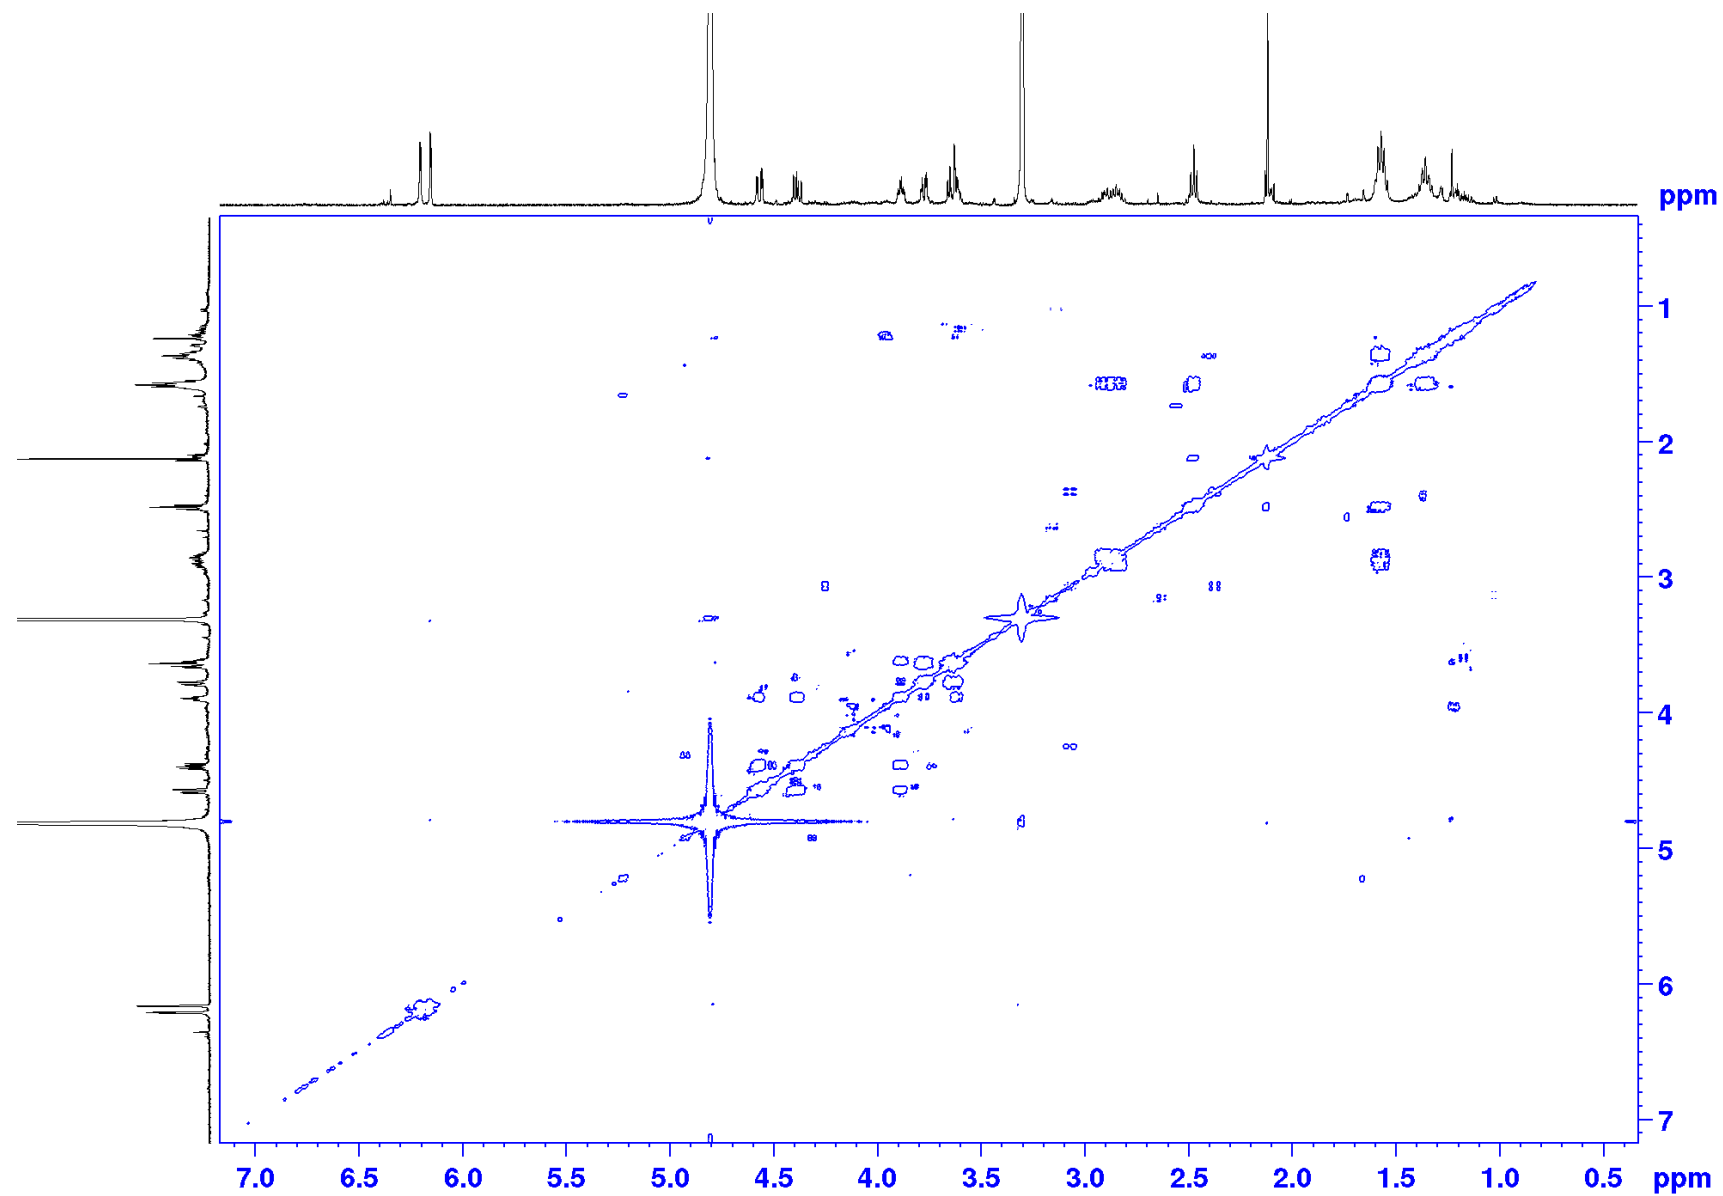

**Figure S36. HRESIMS for 6**

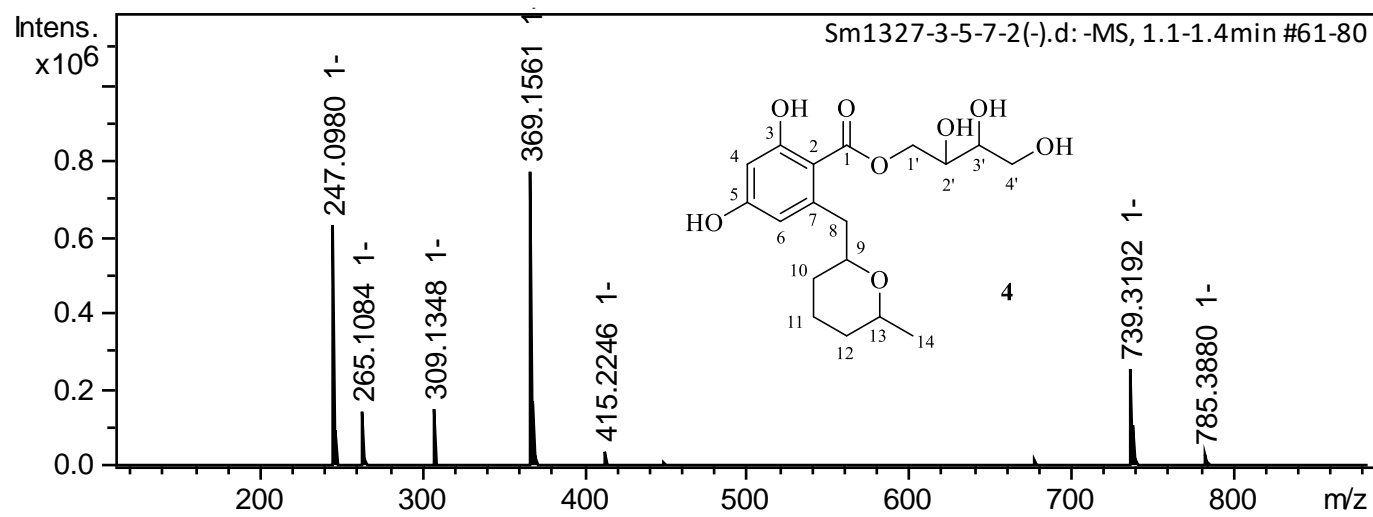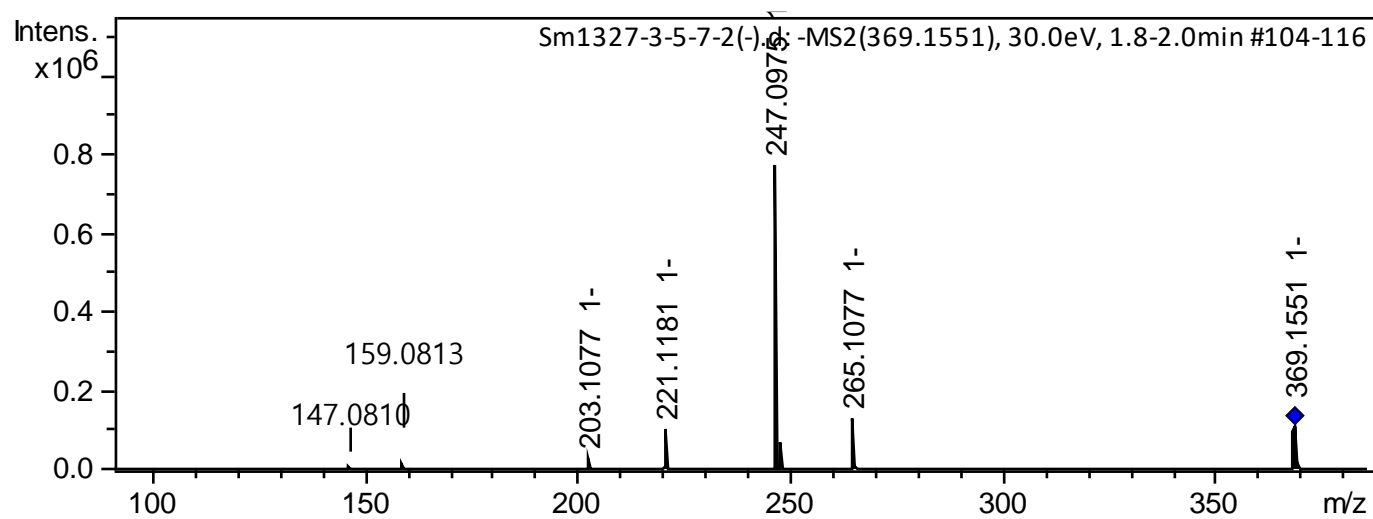

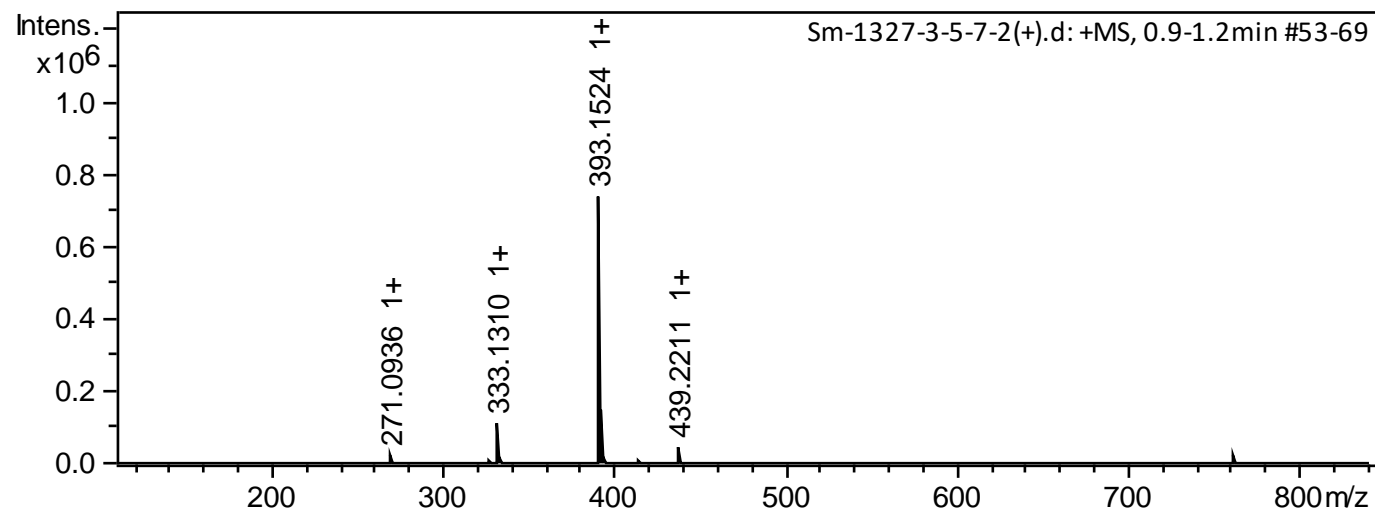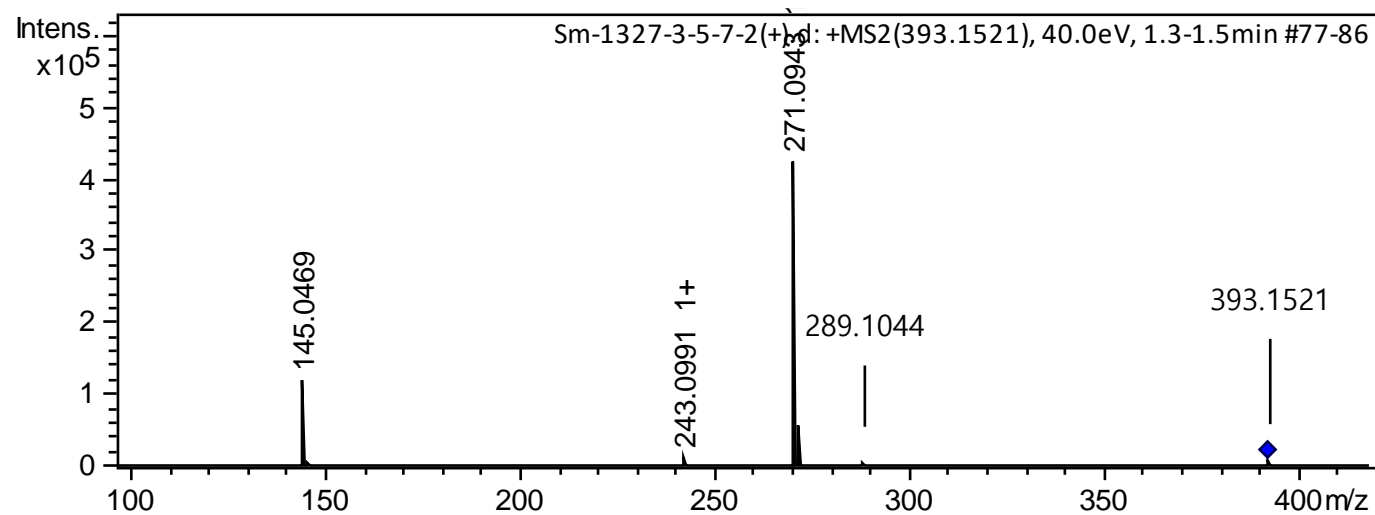

|                     | meas     | calc     | $\Delta$<br>(ppm) |
|---------------------|----------|----------|-------------------|
| [M-H] <sup>-</sup>  | 369,1561 | 369,1555 | -1,7              |
| [M+Na] <sup>+</sup> | 393,1524 | 393,152  | -0,9              |

Figure S37.  $^1\text{H}$  NMR spectrum of **6** measured at 700 MHz in acetone- $\text{d}_6$

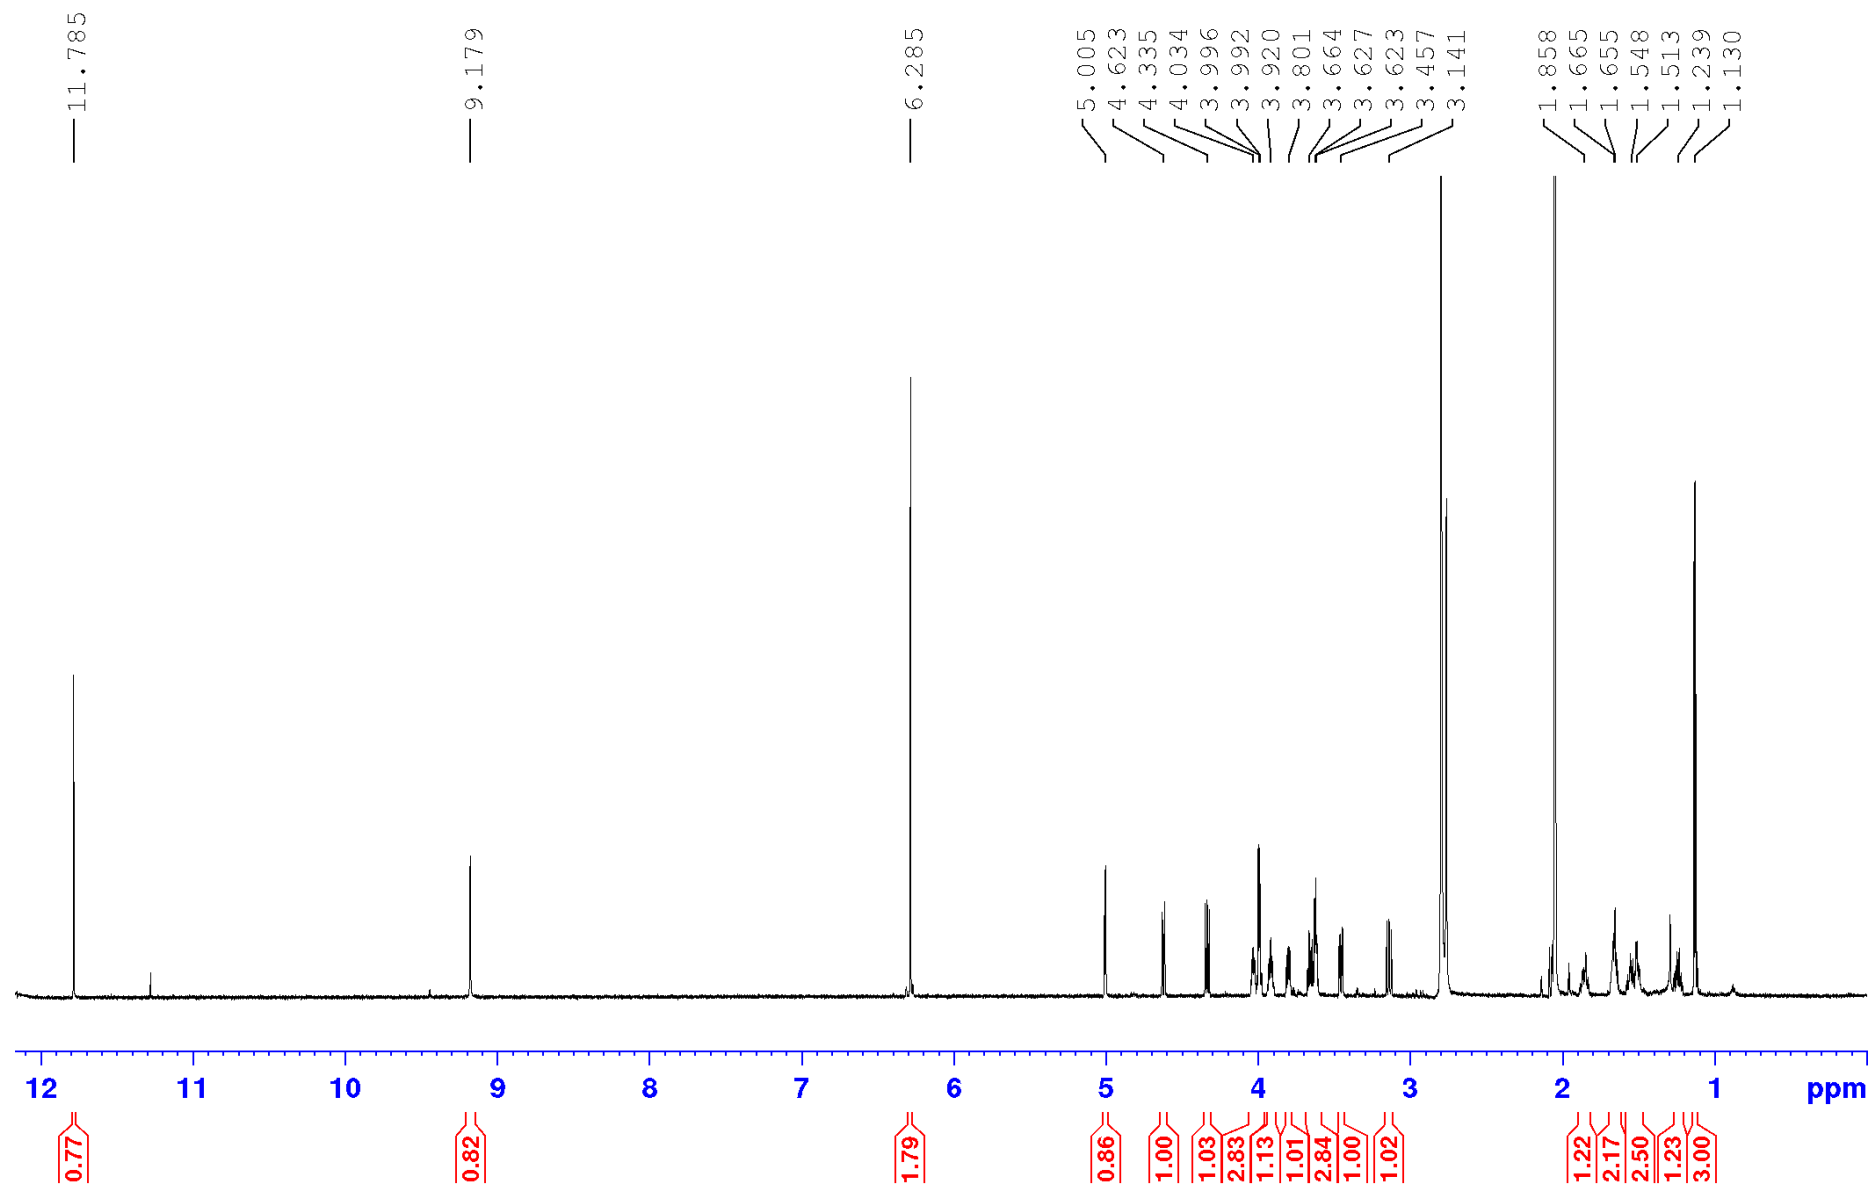

Figure S38.  $^{13}\text{C}$  NMR spectrum of 6 measured at 175 MHz in acetone- $\text{d}_6$

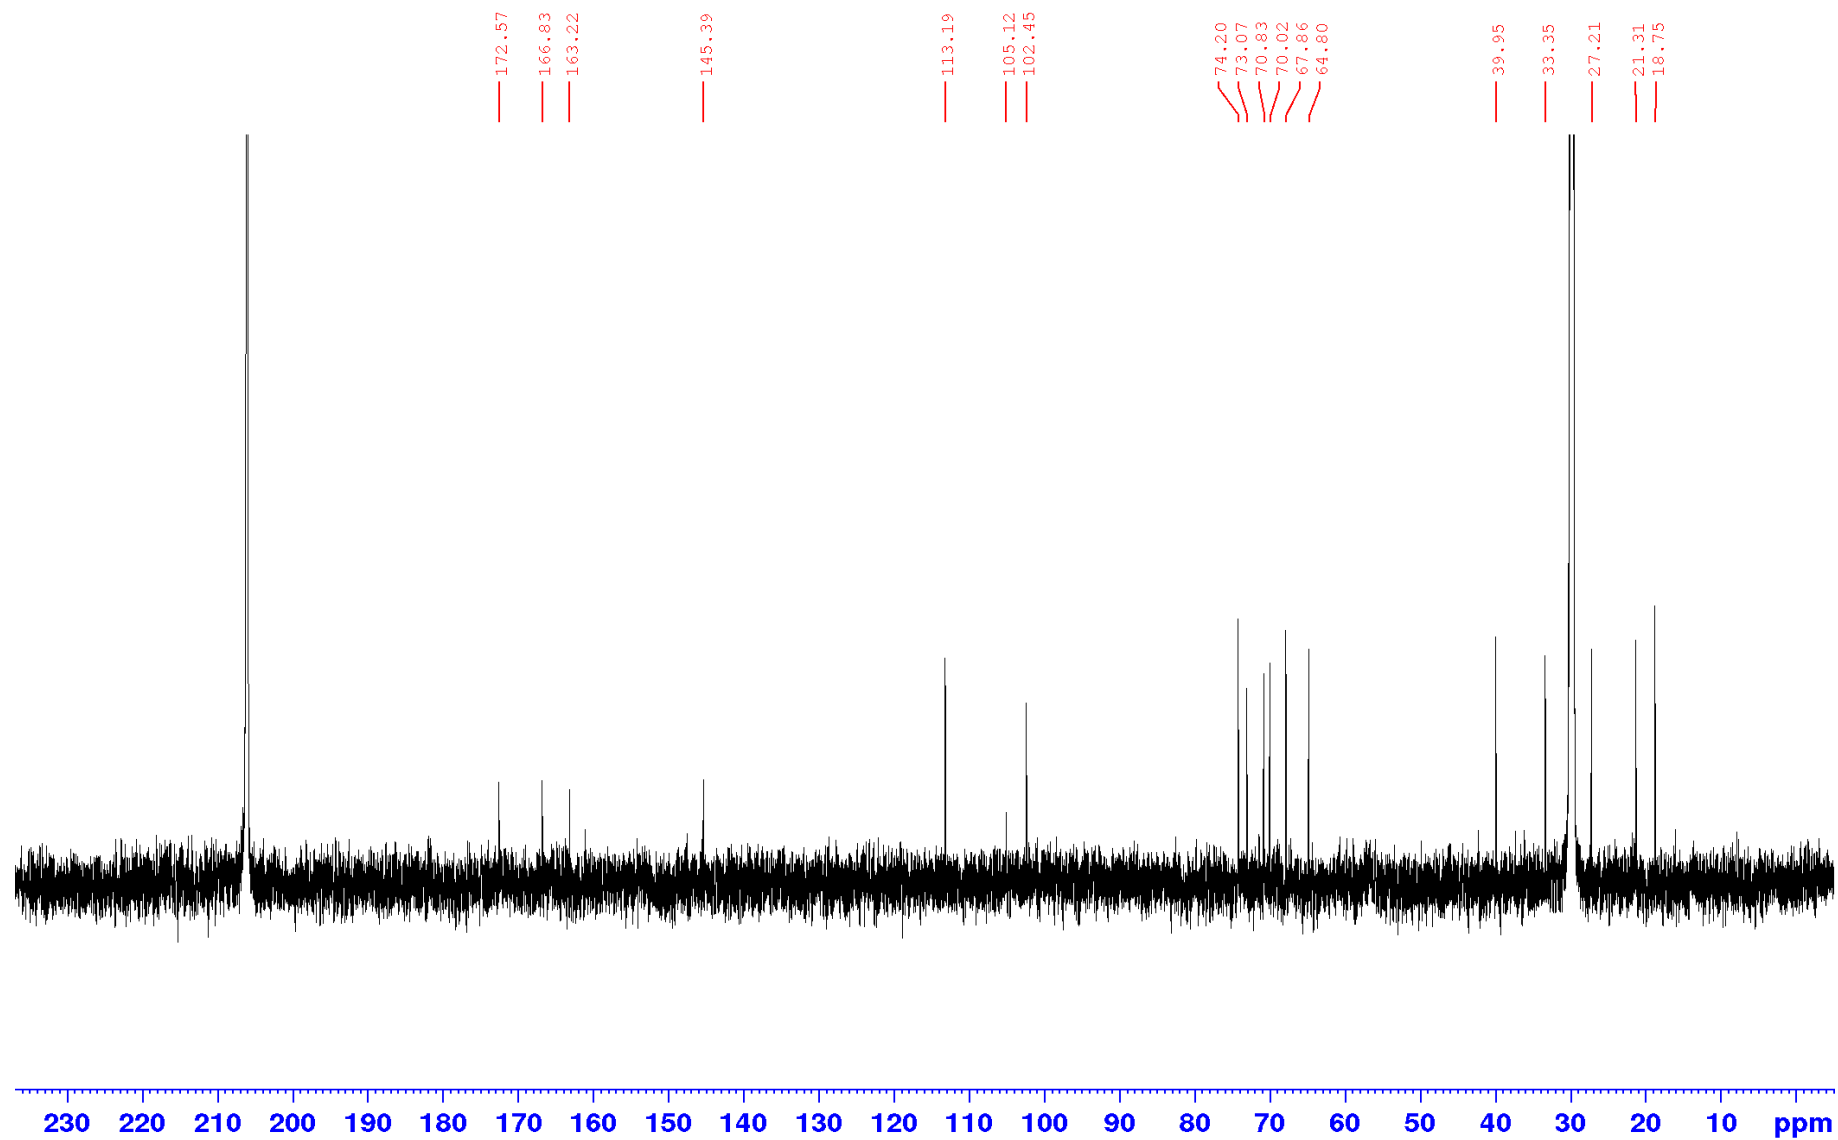



Figure S39. DEPT spectrum of 6 measured at 175 MHz in MeOD

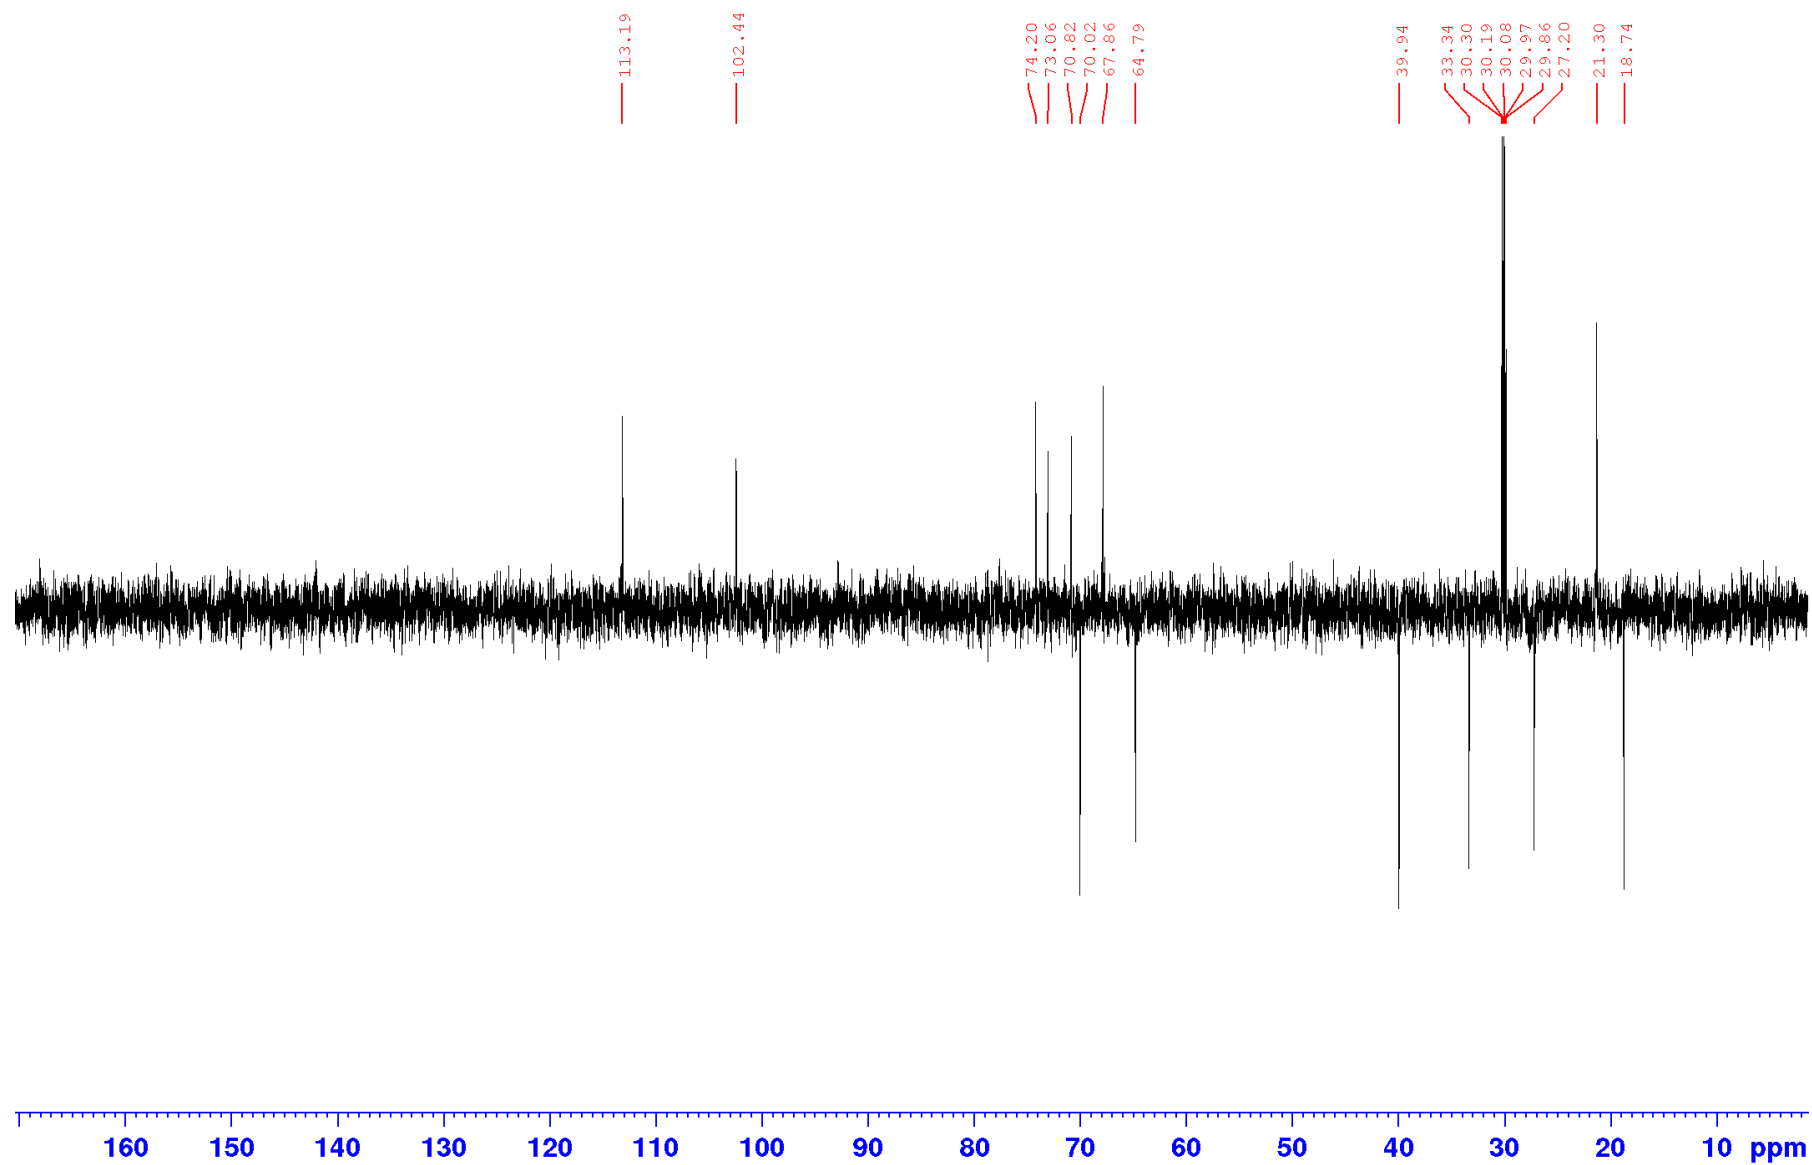

Figure S40. HSQC spectrum of 6 measured in acetone-d<sub>6</sub>

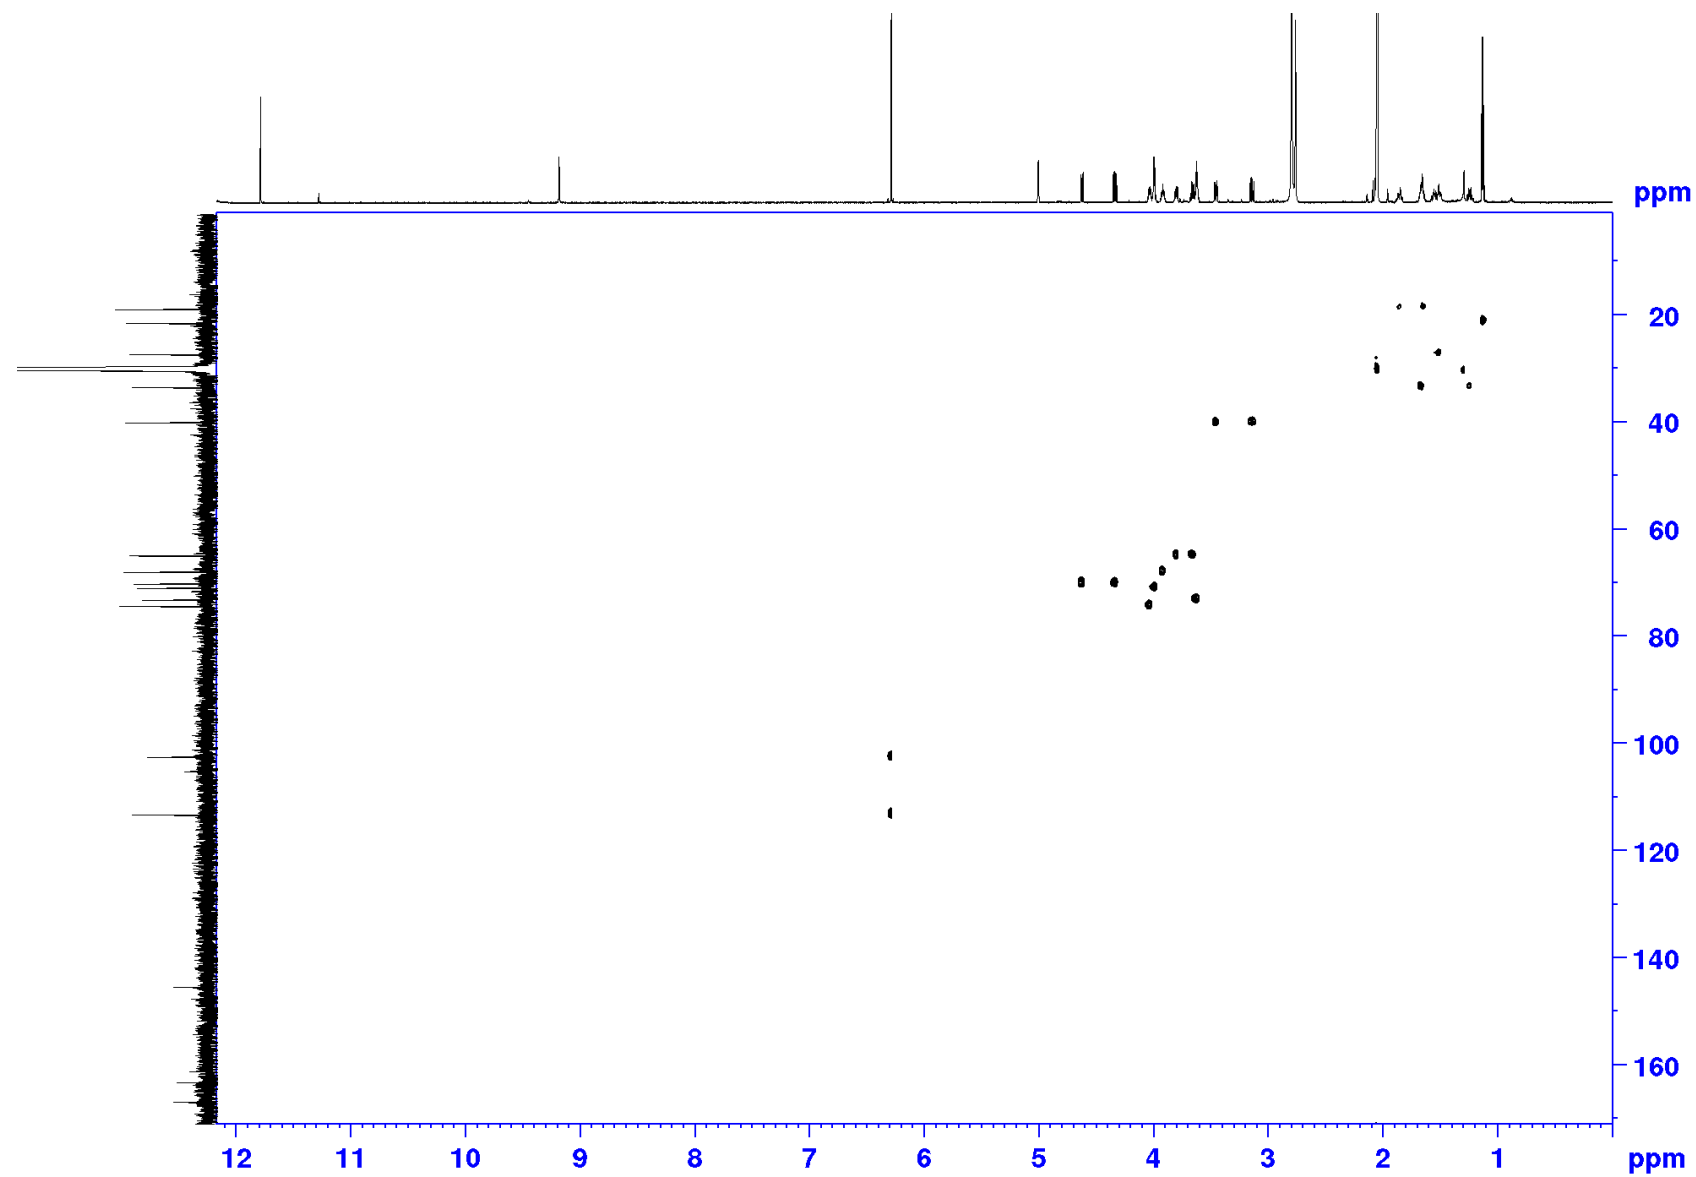

Figure S41. COSY spectrum of 6 measured in acetone- $d_6$

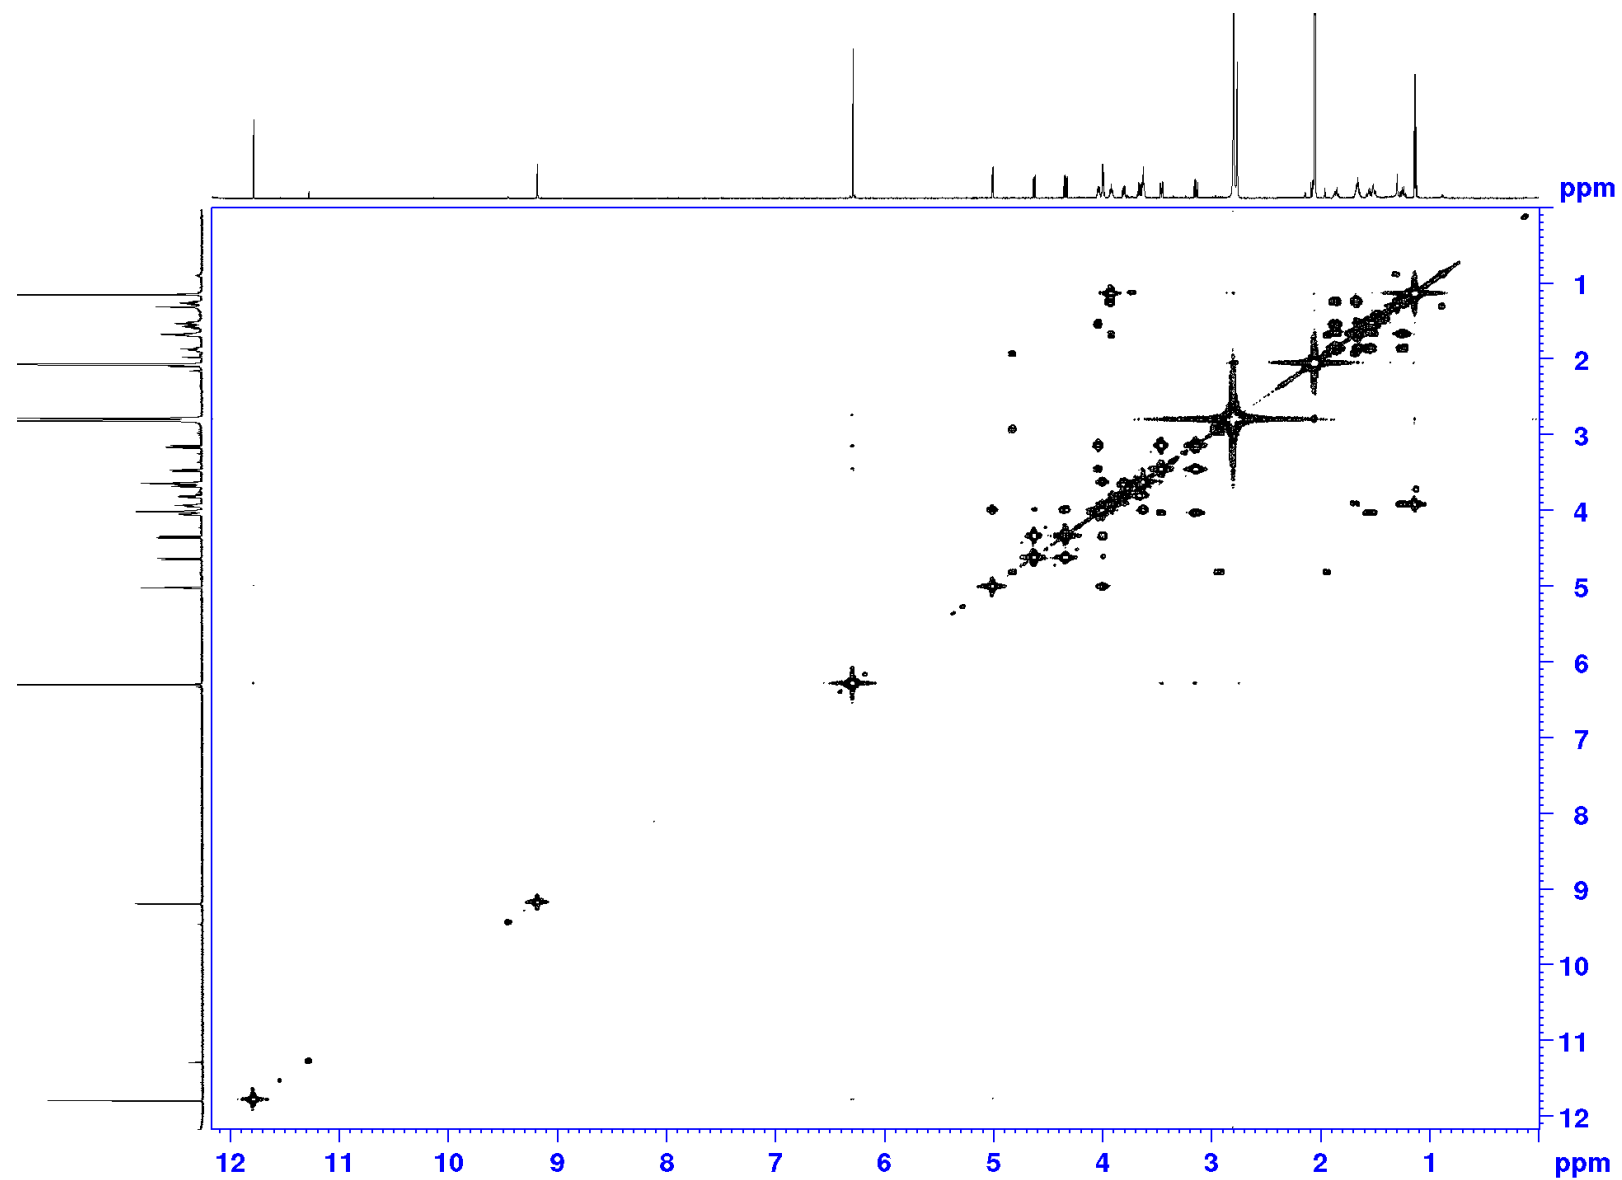

Figure S42. HMBC spectrum of 6 measured in acetone- $d_6$

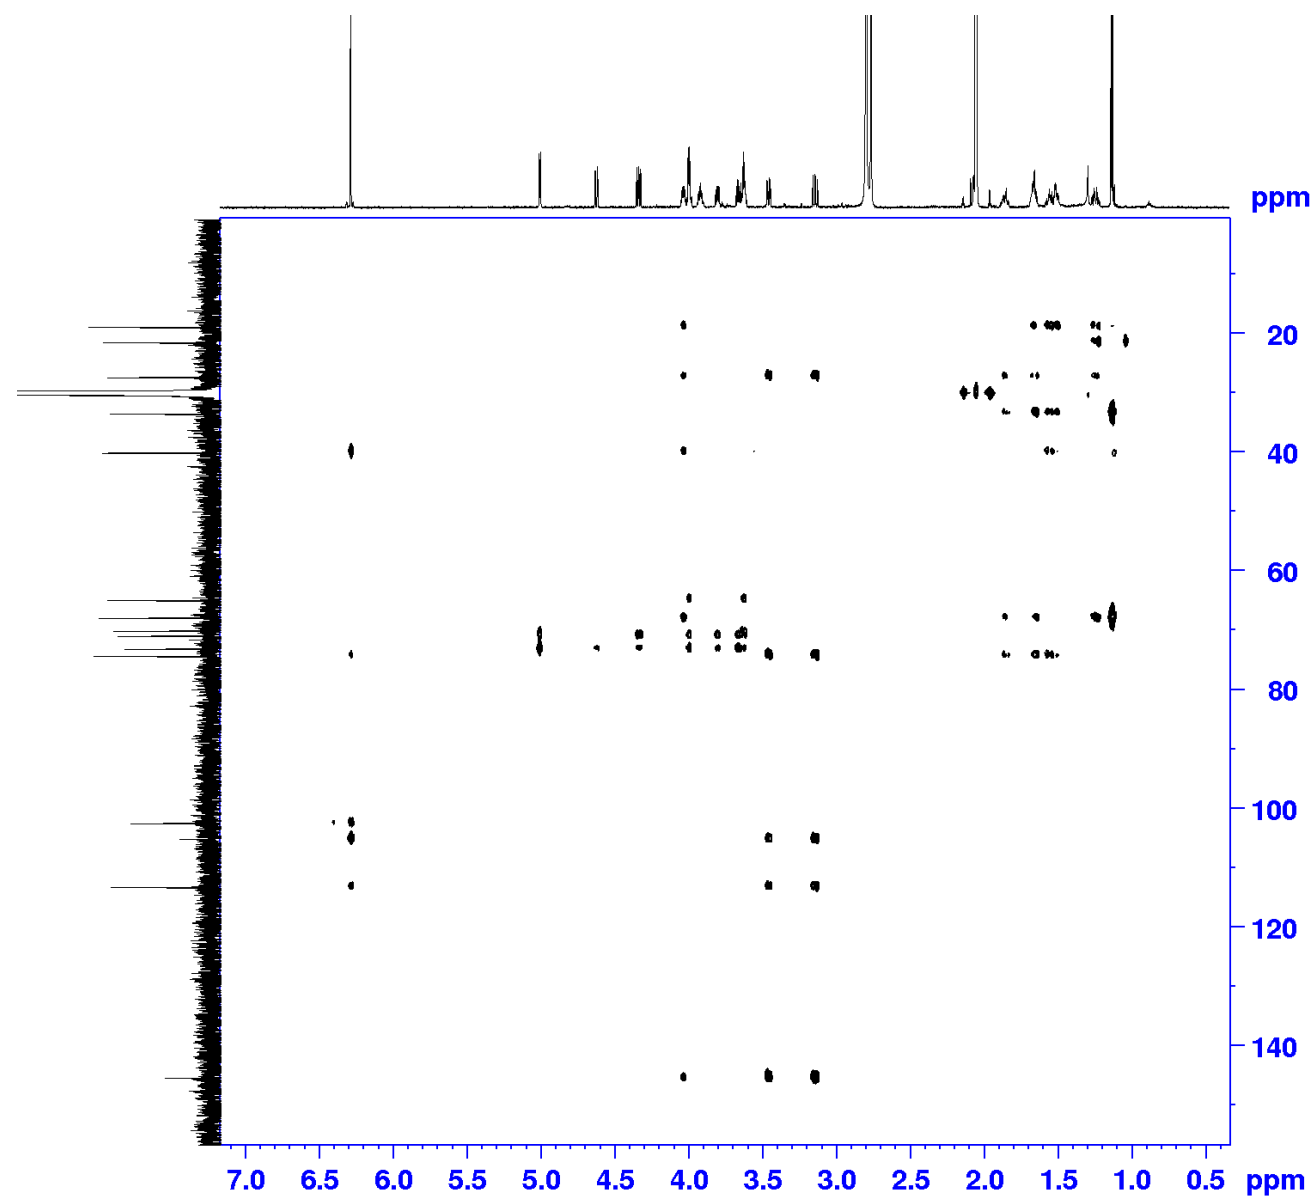

**Figure S43. HRESIMS for 6a**

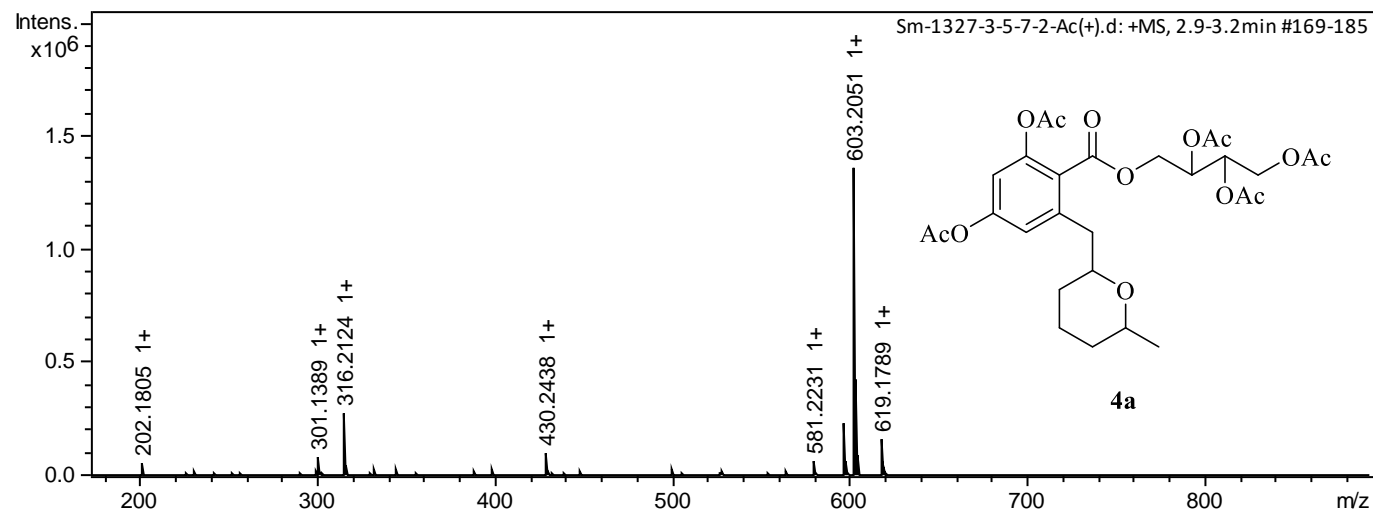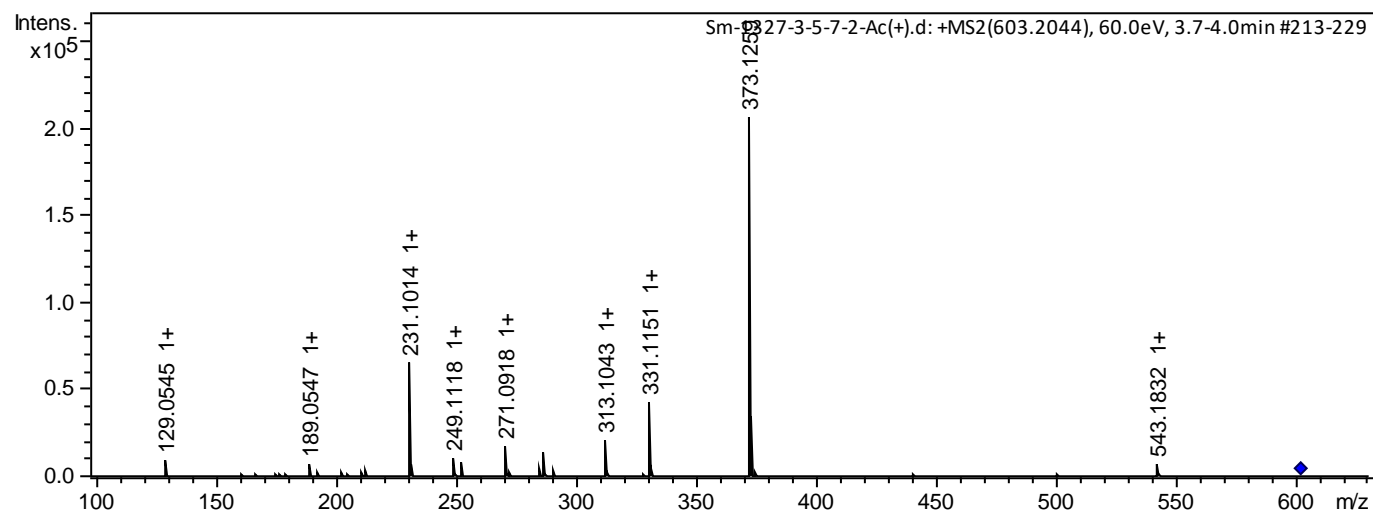

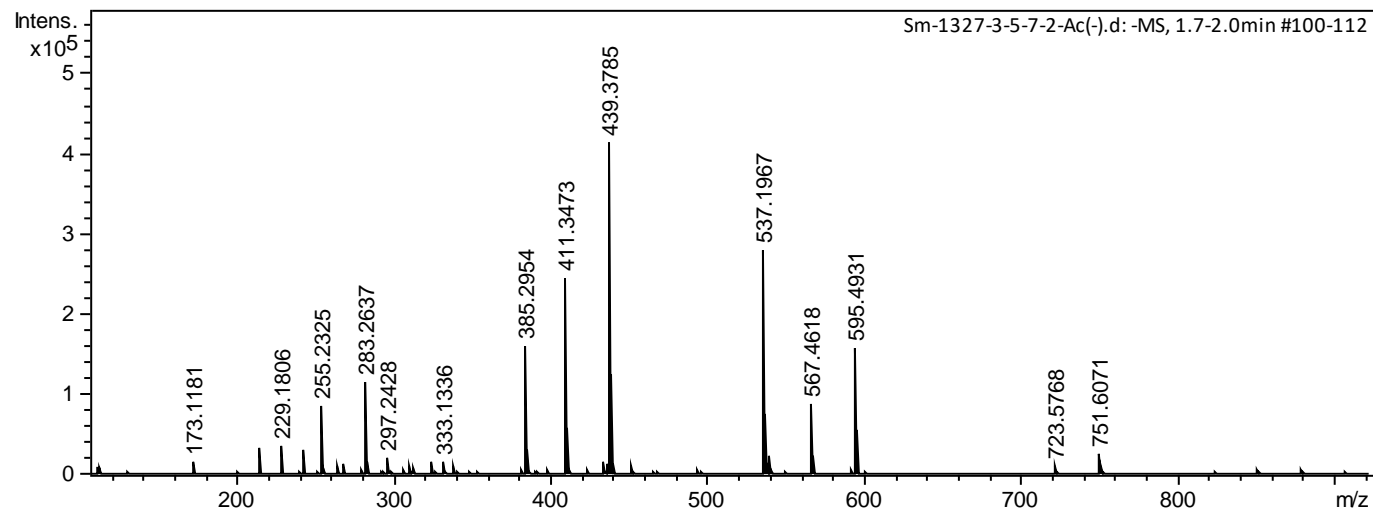

|                     | meas     | calc     | $\Delta$<br>(ppm) |
|---------------------|----------|----------|-------------------|
| [M+Na] <sup>+</sup> | 603,2051 | 603,2048 | -0,4              |

| Meas. m/z | Ion Formula                                      | m/z      | err<br>[ppm] | mSigma | rdb | e <sup>-</sup> Conf | N-Rule |
|-----------|--------------------------------------------------|----------|--------------|--------|-----|---------------------|--------|
| 129,0545  | C <sub>6</sub> H <sub>9</sub> O <sub>3</sub>     | 129,0546 | 1            | 4,7    | 3   | even                | ok     |
| 189,0547  | C <sub>11</sub> H <sub>9</sub> O <sub>3</sub>    | 189,0546 | -0,2         | 11,2   | 8   | even                | ok     |
| 231,1014  | C <sub>14</sub> H <sub>15</sub> O <sub>3</sub>   | 231,1016 | 0,8          | 28,9   | 8   | even                | ok     |
| 249,1118  | C <sub>14</sub> H <sub>17</sub> O <sub>4</sub>   | 249,1121 | 1,2          | 26,4   | 7   | even                | ok     |
| 271,0918  | C <sub>14</sub> H <sub>16</sub> NaO <sub>4</sub> | 271,0941 | 8,4          | 27,6   | 7   | even                | ok     |
| 285,1092  | C <sub>15</sub> H <sub>18</sub> NaO <sub>4</sub> | 285,1097 | 1,9          | 16     | 7   | even                | ok     |
| 287,1251  | C <sub>15</sub> H <sub>20</sub> NaO <sub>4</sub> | 287,1254 | 1,1          | 29,4   | 6   | even                | ok     |
| 313,1043  | C <sub>16</sub> H <sub>18</sub> NaO <sub>5</sub> | 313,1046 | 1,1          | 27,9   | 8   | even                | ok     |
| 331,1151  | C <sub>16</sub> H <sub>20</sub> NaO <sub>6</sub> | 331,1152 | 0,3          | 30,4   | 7   | even                | ok     |
| 373,1259  | C <sub>18</sub> H <sub>22</sub> NaO <sub>7</sub> | 373,1258 | -0,3         | 20,4   | 8   | even                | ok     |
| 441,1515  | C <sub>22</sub> H <sub>26</sub> NaO <sub>8</sub> | 441,152  | 1,1          | 30     | 10  | even                | ok     |

|          |                                                   |          |      |      |    |      |    |
|----------|---------------------------------------------------|----------|------|------|----|------|----|
| 485,1786 | C <sub>24</sub> H <sub>30</sub> NaO <sub>9</sub>  | 485,1782 | -0,9 | n.a. | 10 | even | ok |
| 501,1725 | C <sub>24</sub> H <sub>30</sub> NaO <sub>10</sub> | 501,1731 | 1,2  | 28,2 | 10 | even | ok |
| 543,1832 | C <sub>26</sub> H <sub>32</sub> NaO <sub>11</sub> | 543,1837 | 0,9  | 30,8 | 11 | even | ok |
| 603,2044 | C <sub>28</sub> H <sub>36</sub> NaO <sub>13</sub> | 603,2048 | 0,7  | 39,4 | 11 | even | ok |
| 253,0681 | C <sub>10</sub> H <sub>14</sub> NaO <sub>6</sub>  | 253,0683 | 0,6  | 7,7  | 4  | even | ok |

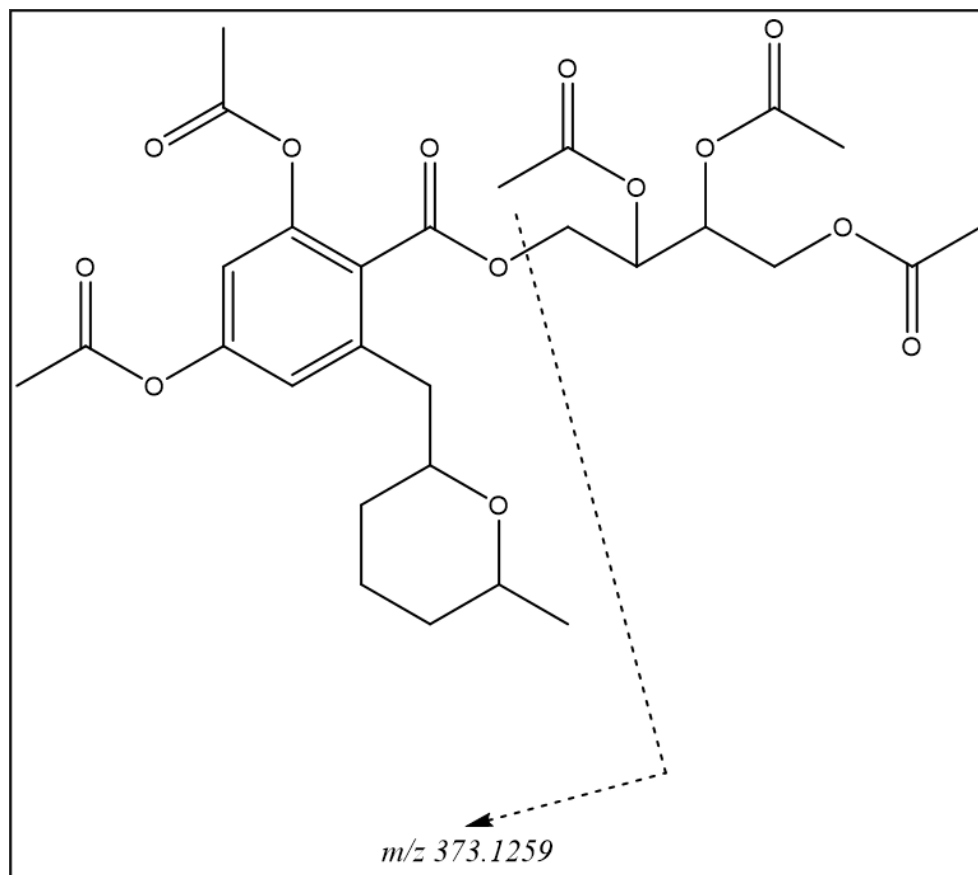

Figure S44.  $^1\text{H}$  NMR spectrum of 6a measured at 700 MHz in acetone- $d_6$

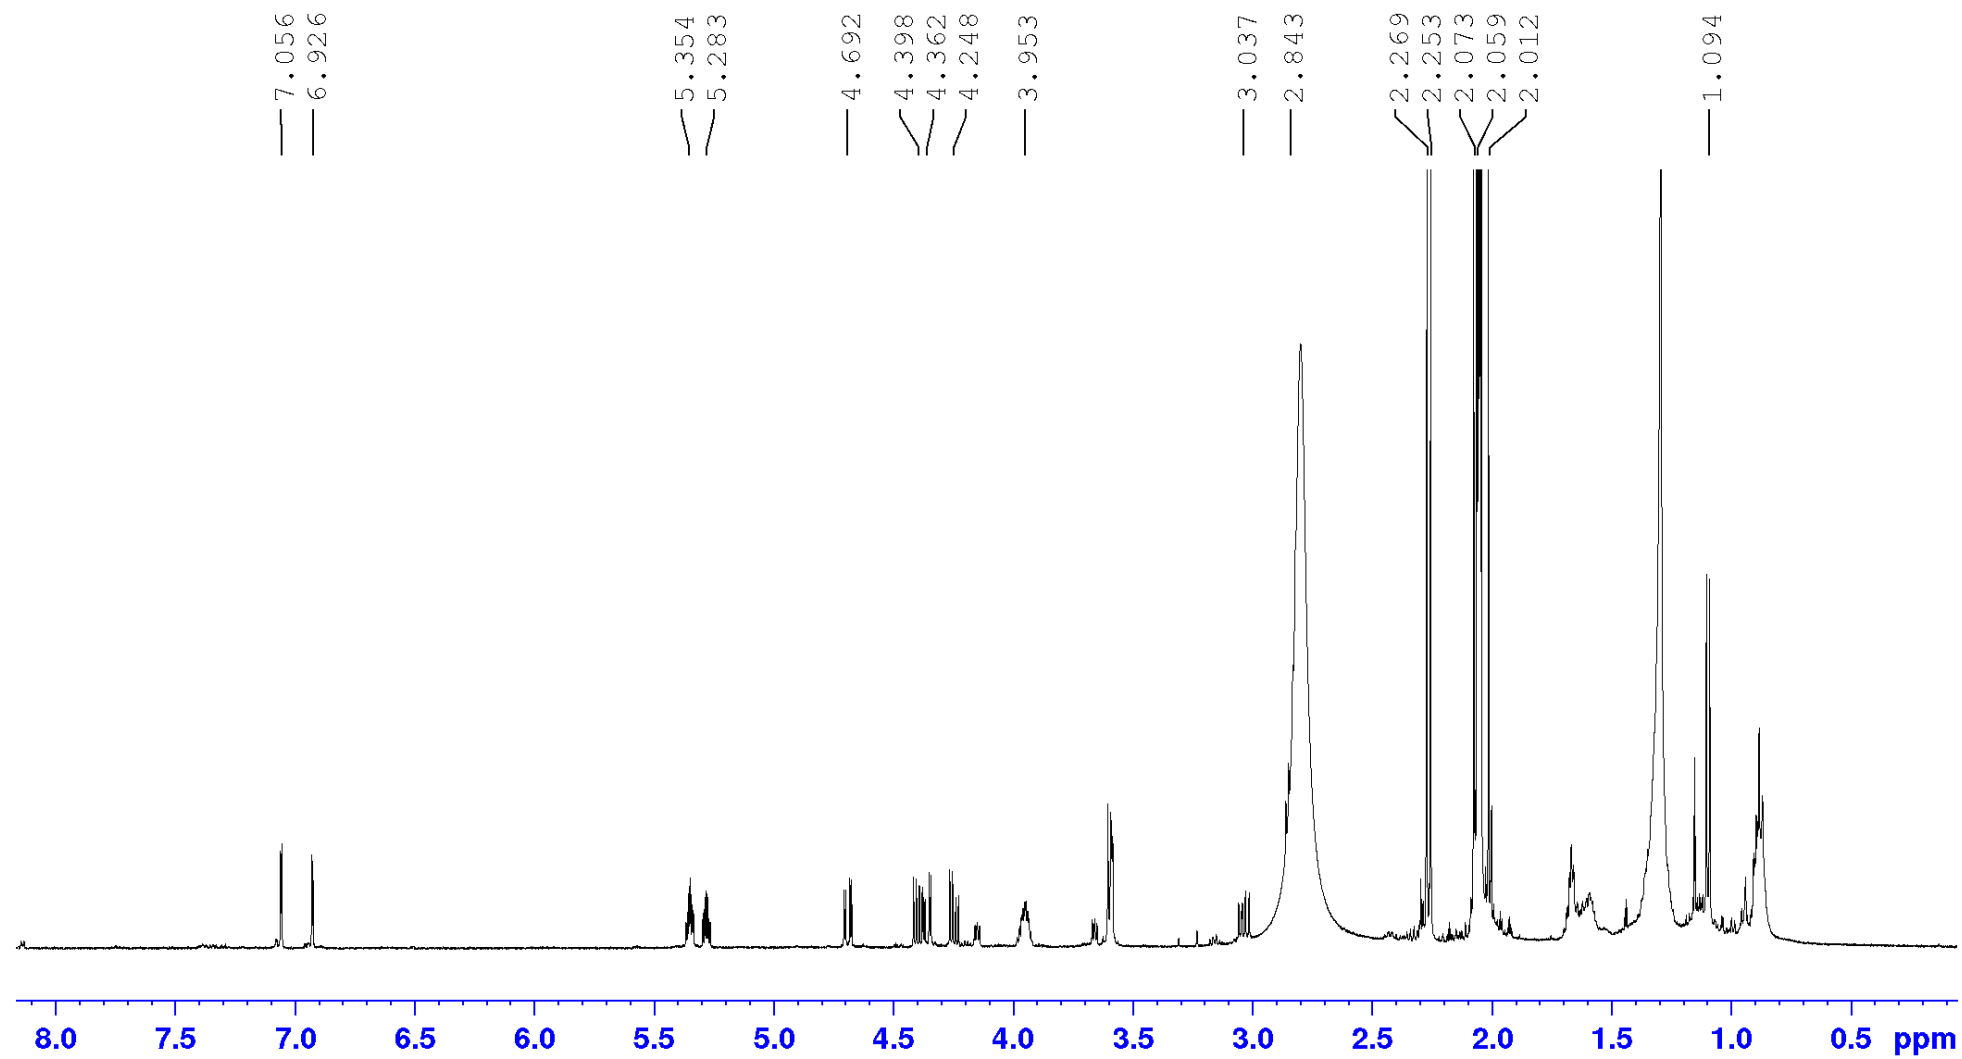



Figure S45.  $^{13}\text{C}$  NMR spectrum of 6a measured at 175 MHz in acetone- $\text{d}_6$

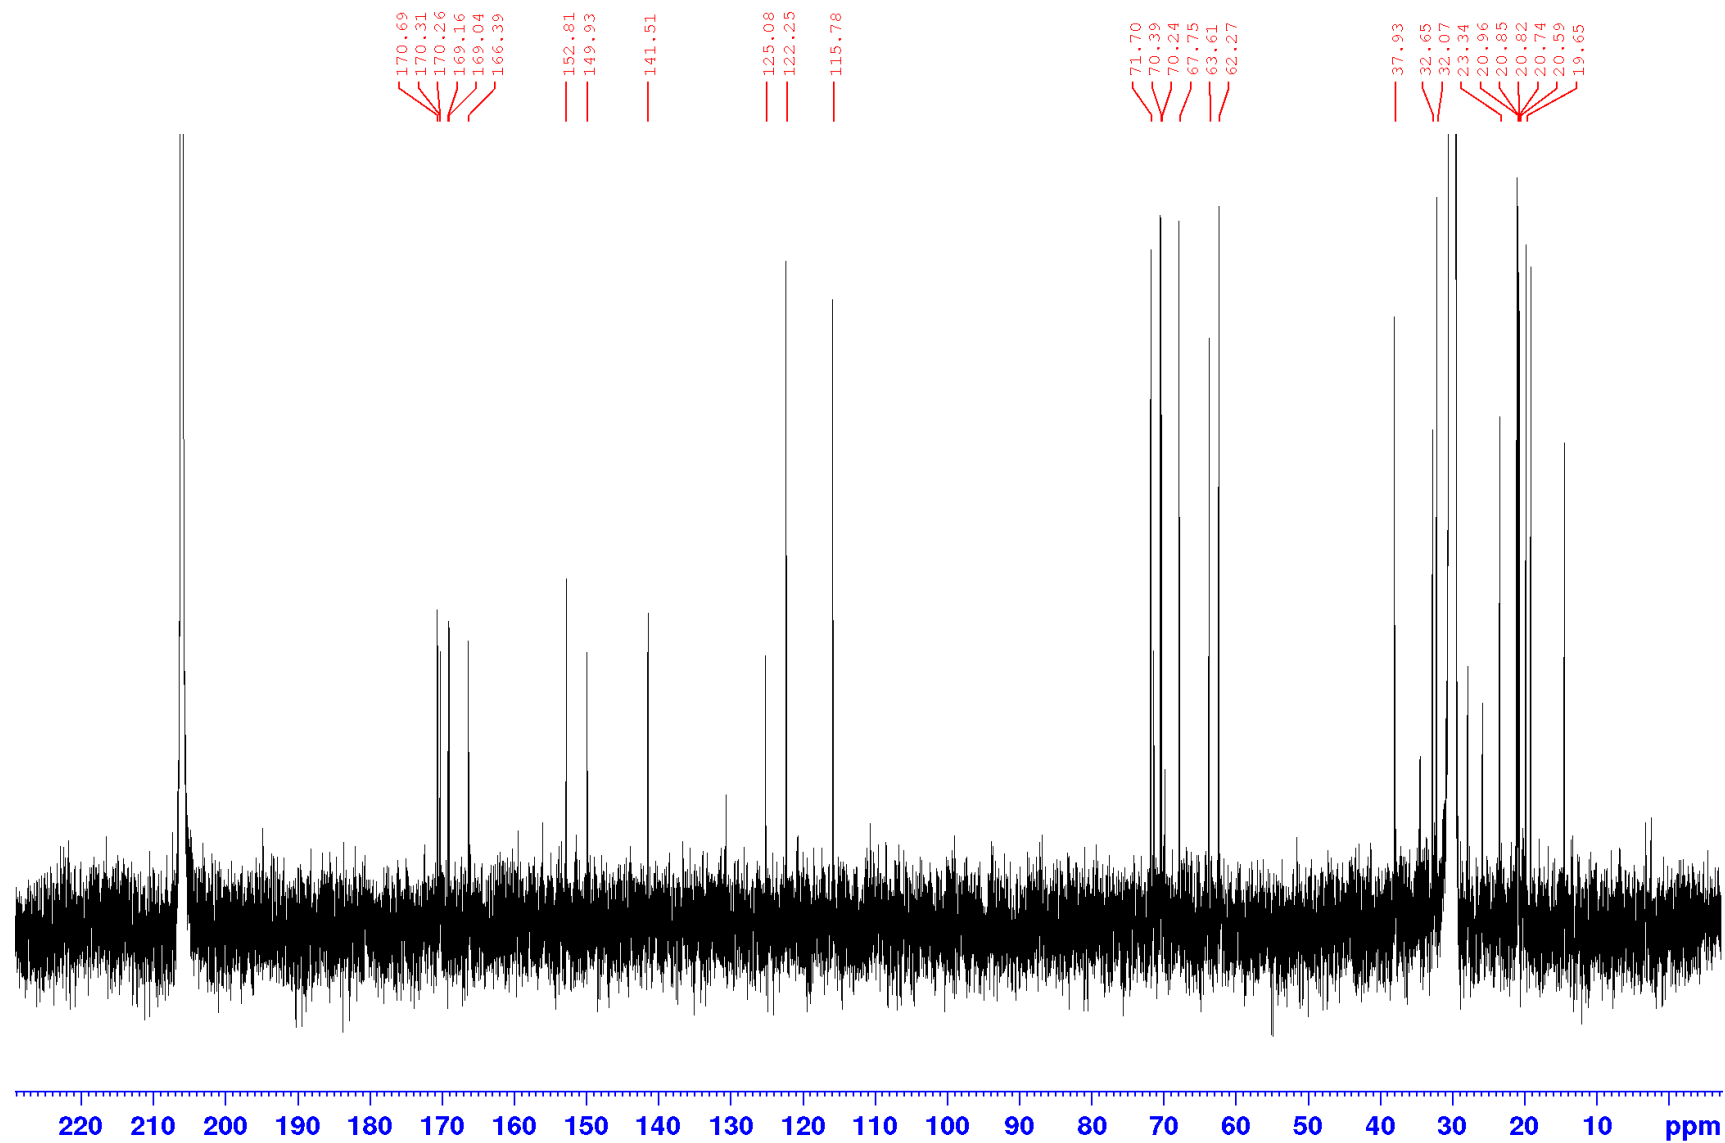

Figure S46. HSQC spectrum of 6a measured in acetone-d<sub>6</sub>

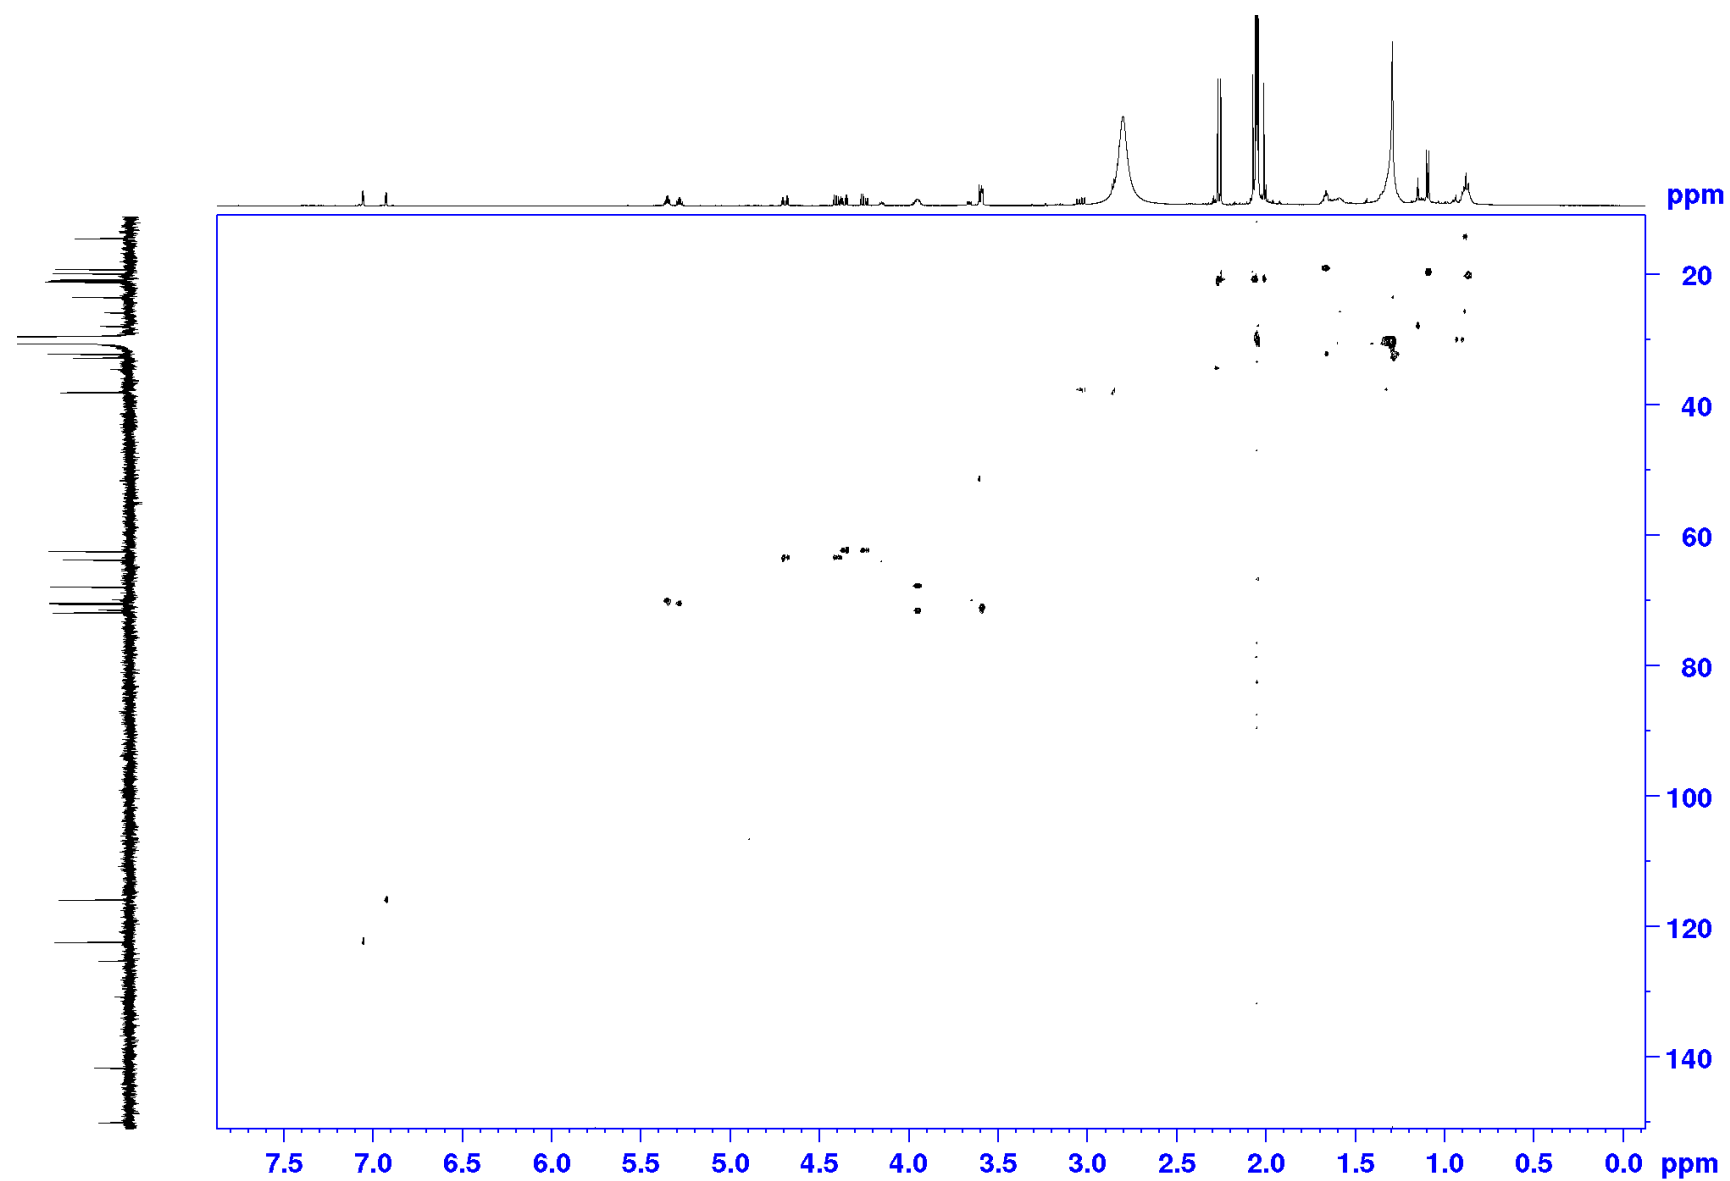

Figure S47. COSY spectrum of 6a measured in acetone-d6

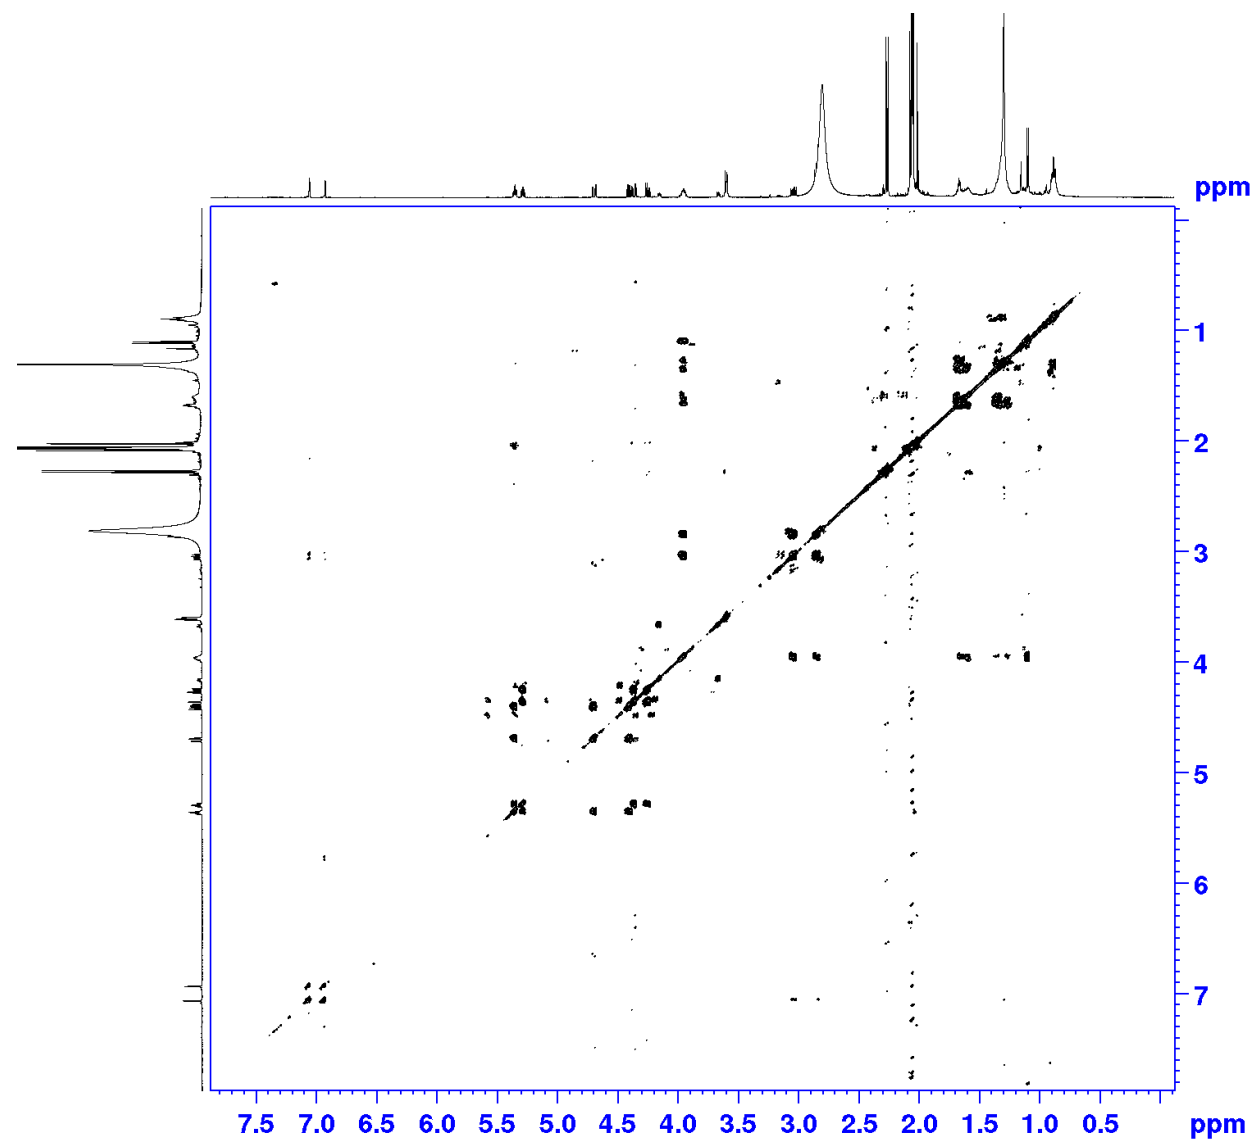

Figure S48. UV and CD data for 1

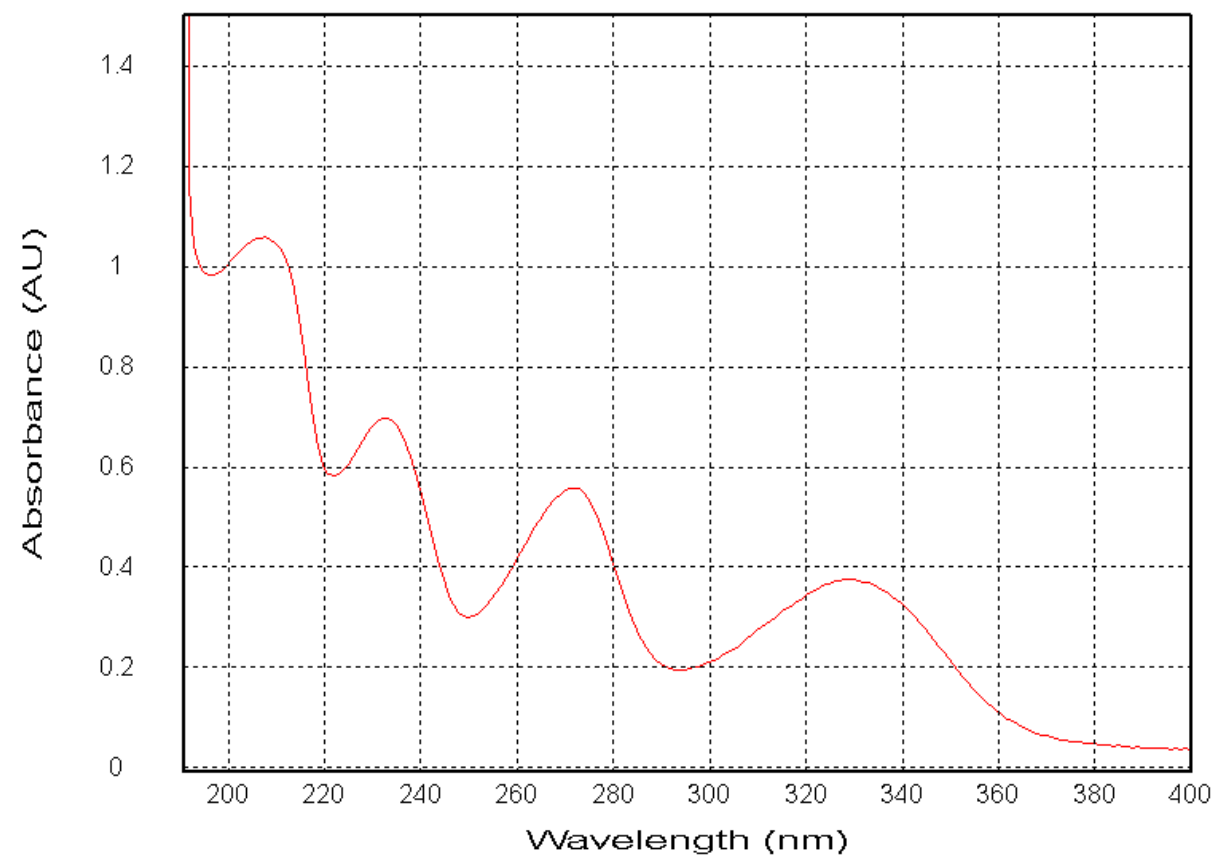

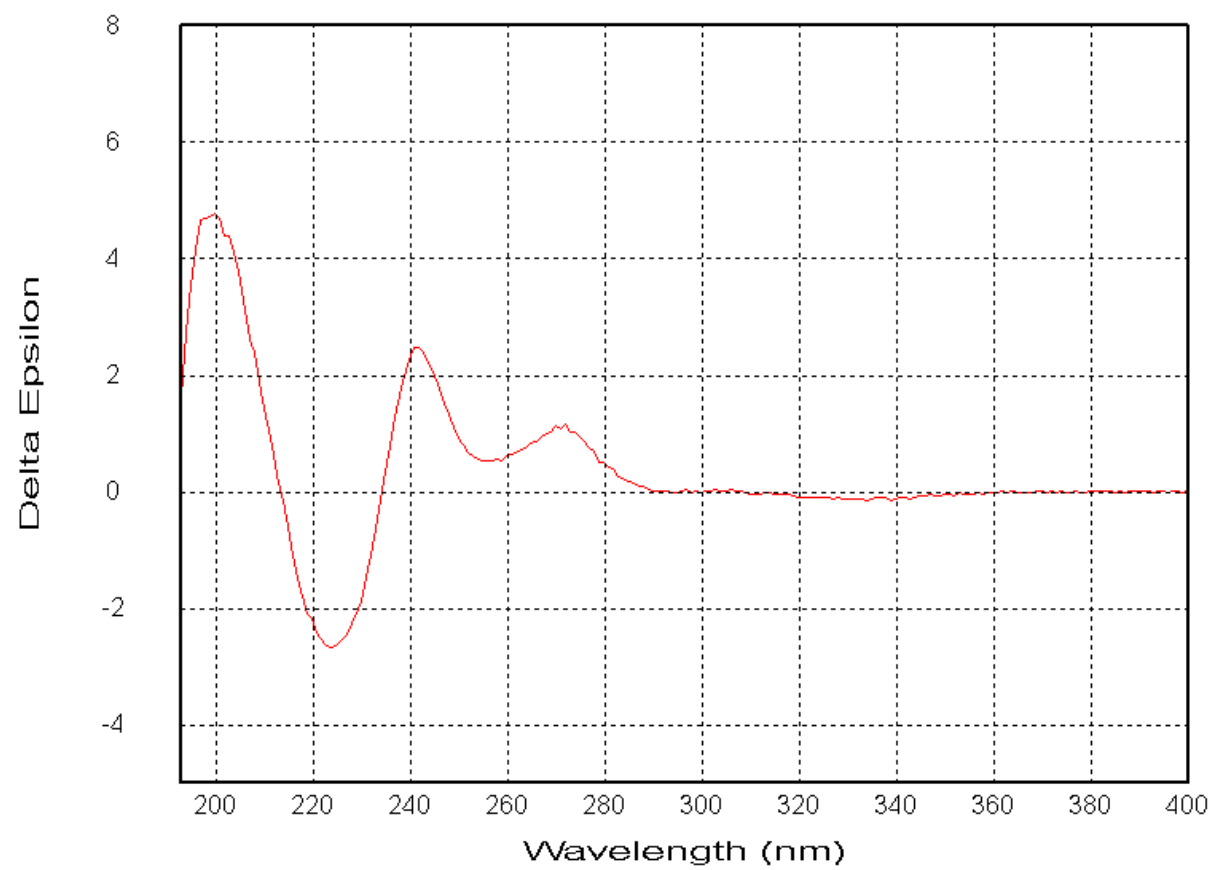

**Figure S49. UV and CD data for 3**

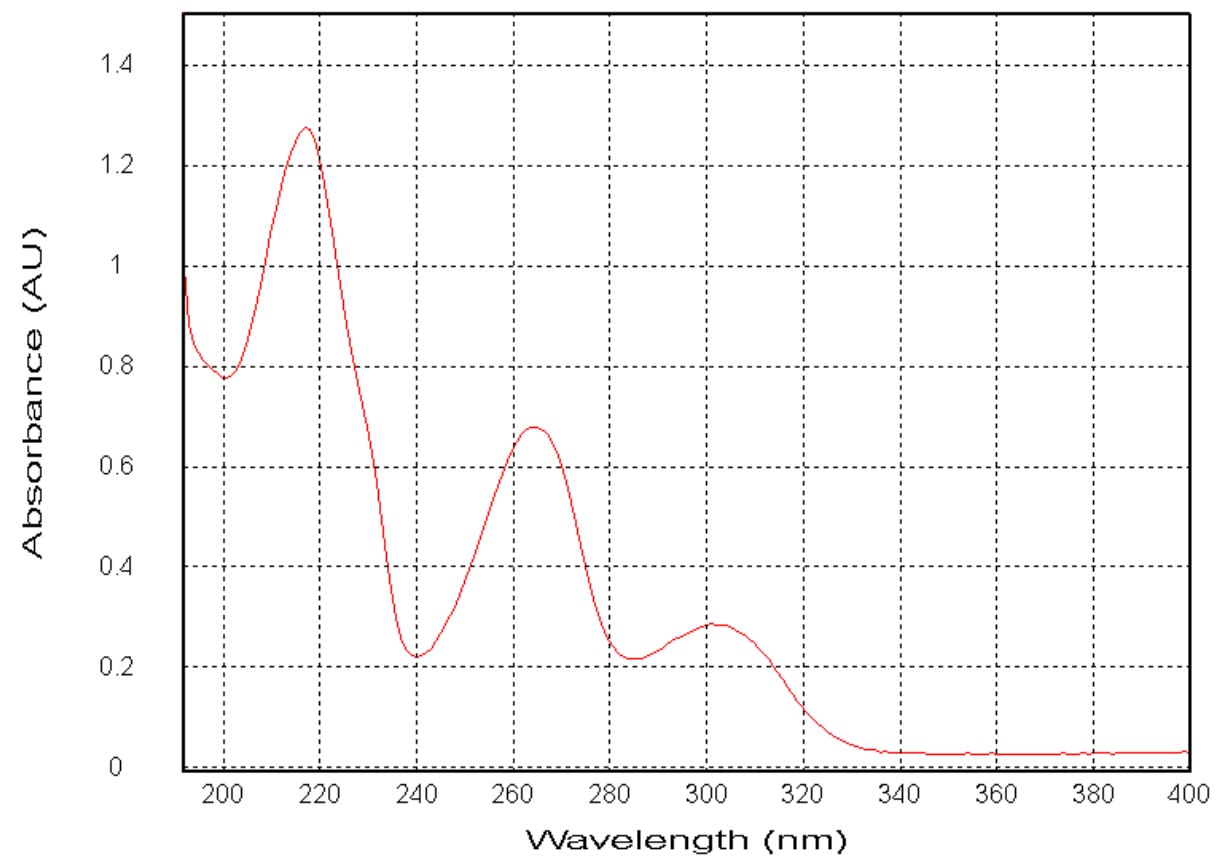

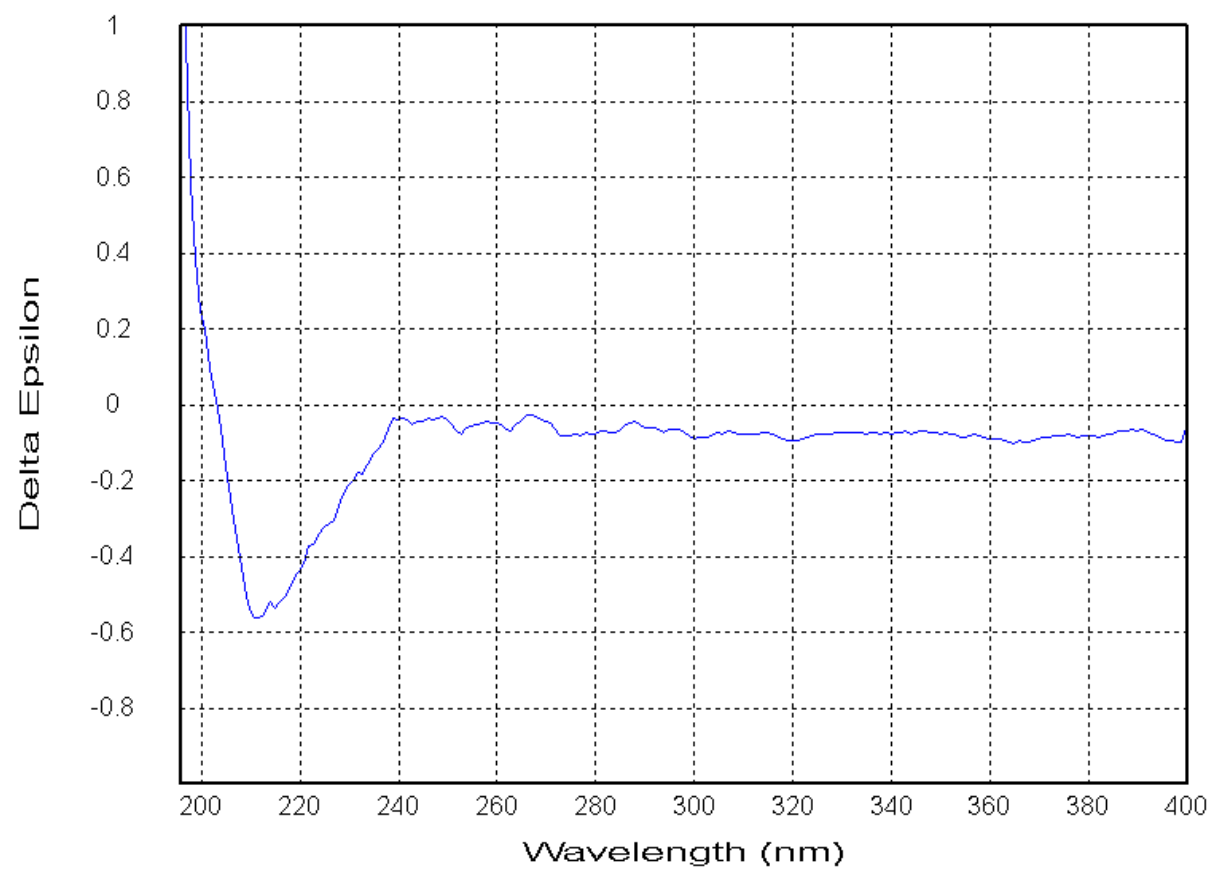

**Figure S50. UV and CD data for 4**

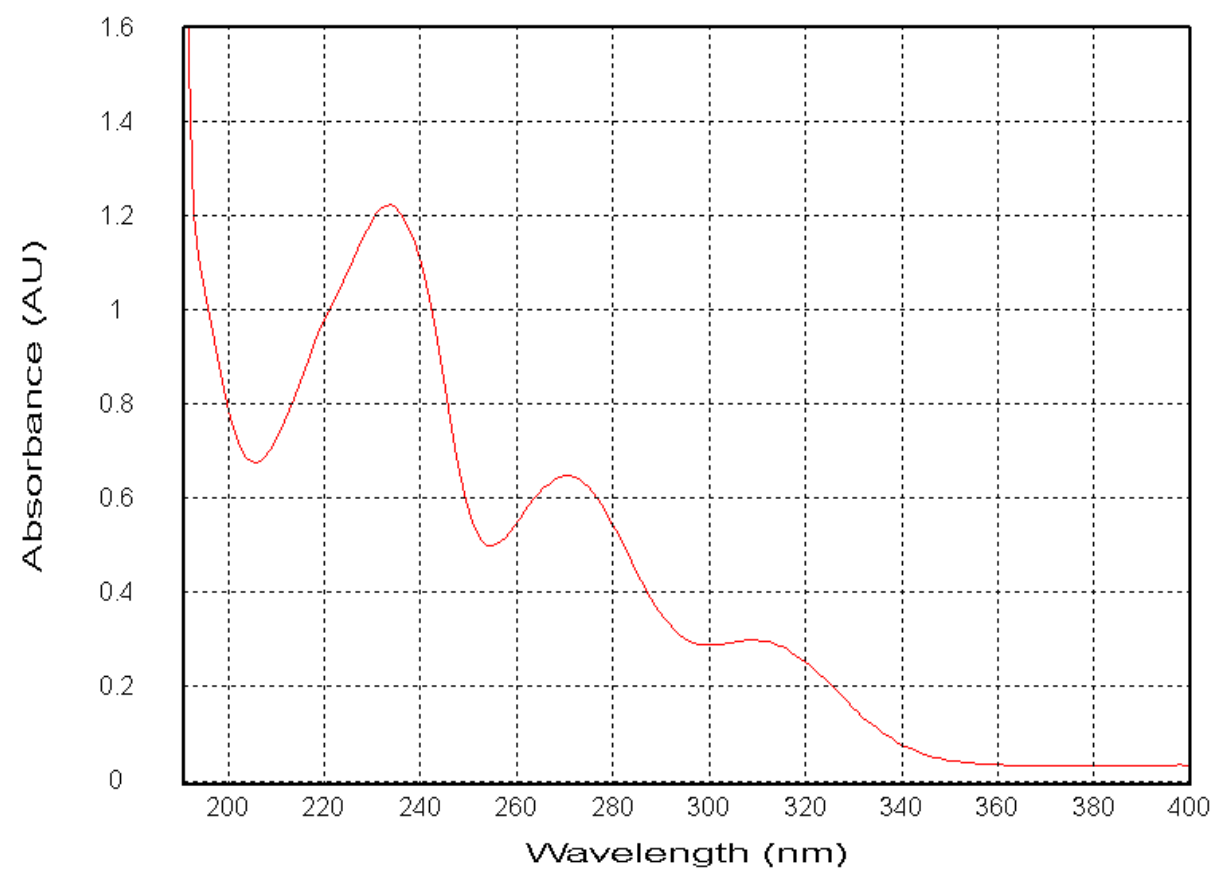



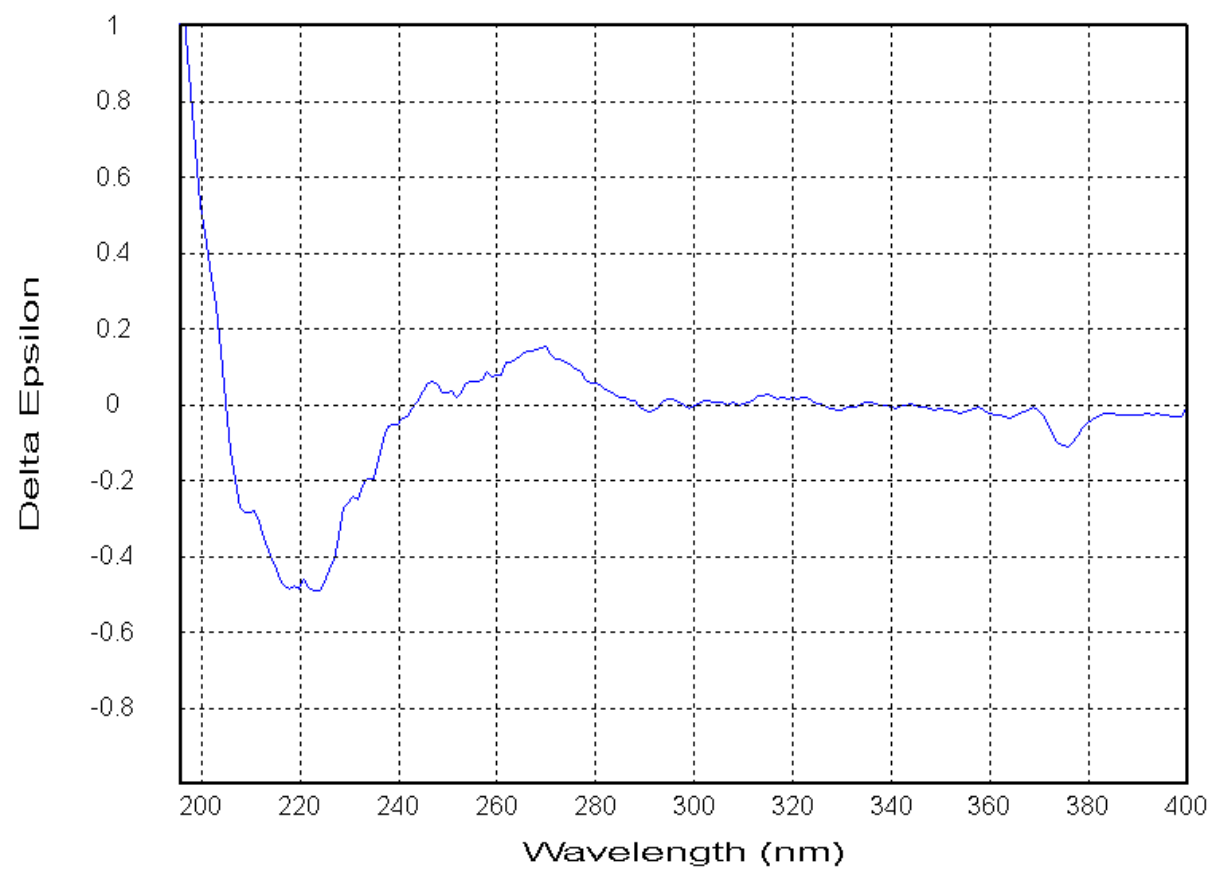

**Figure S51. UV and CD data for 5**

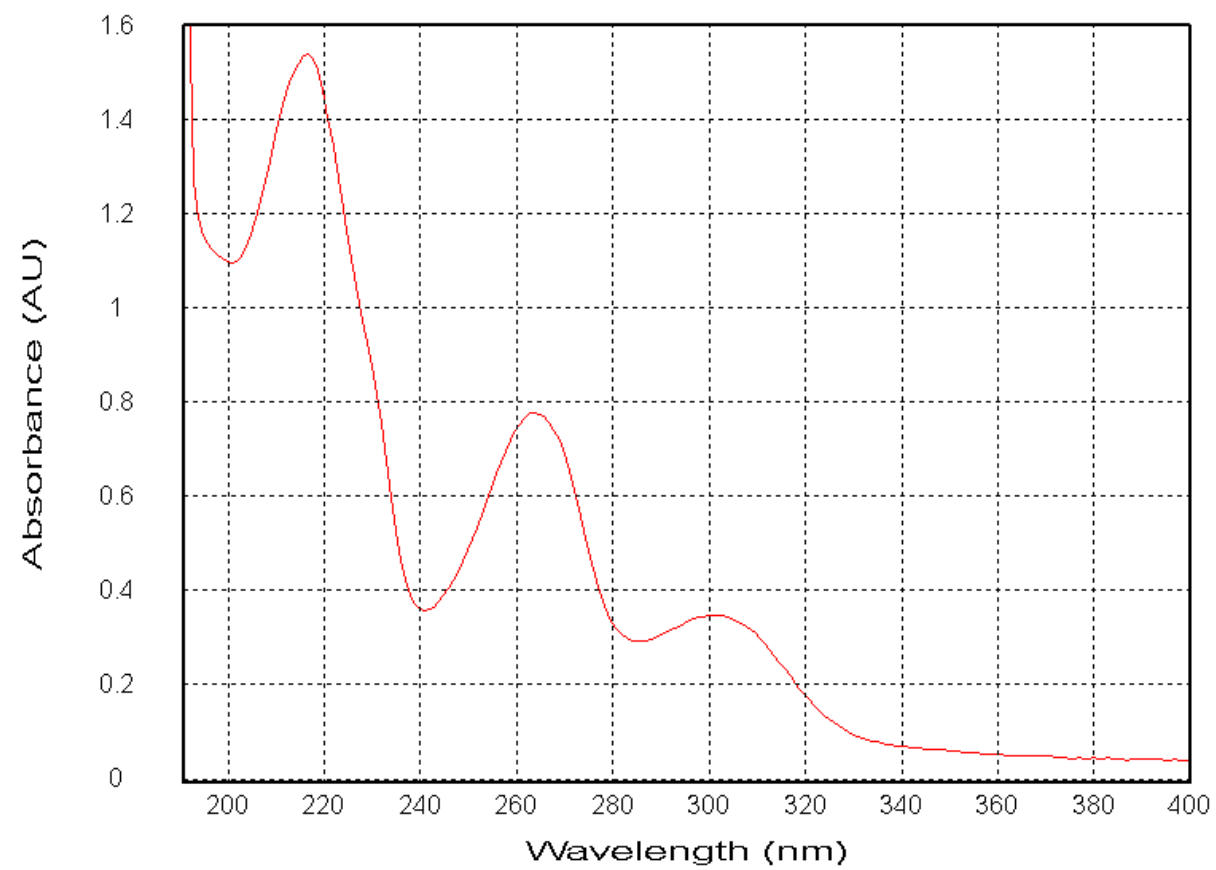

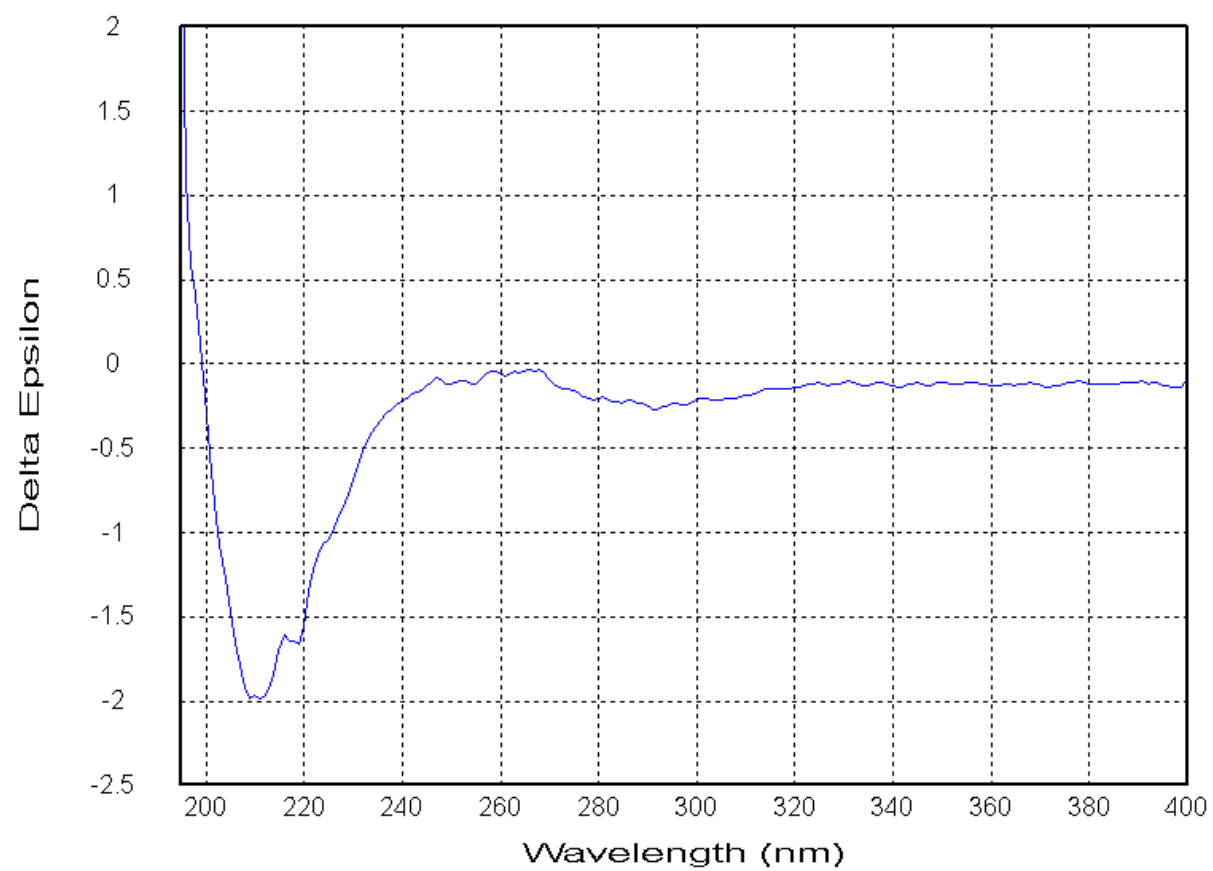

**Figure S52. UV and CD data for 6**

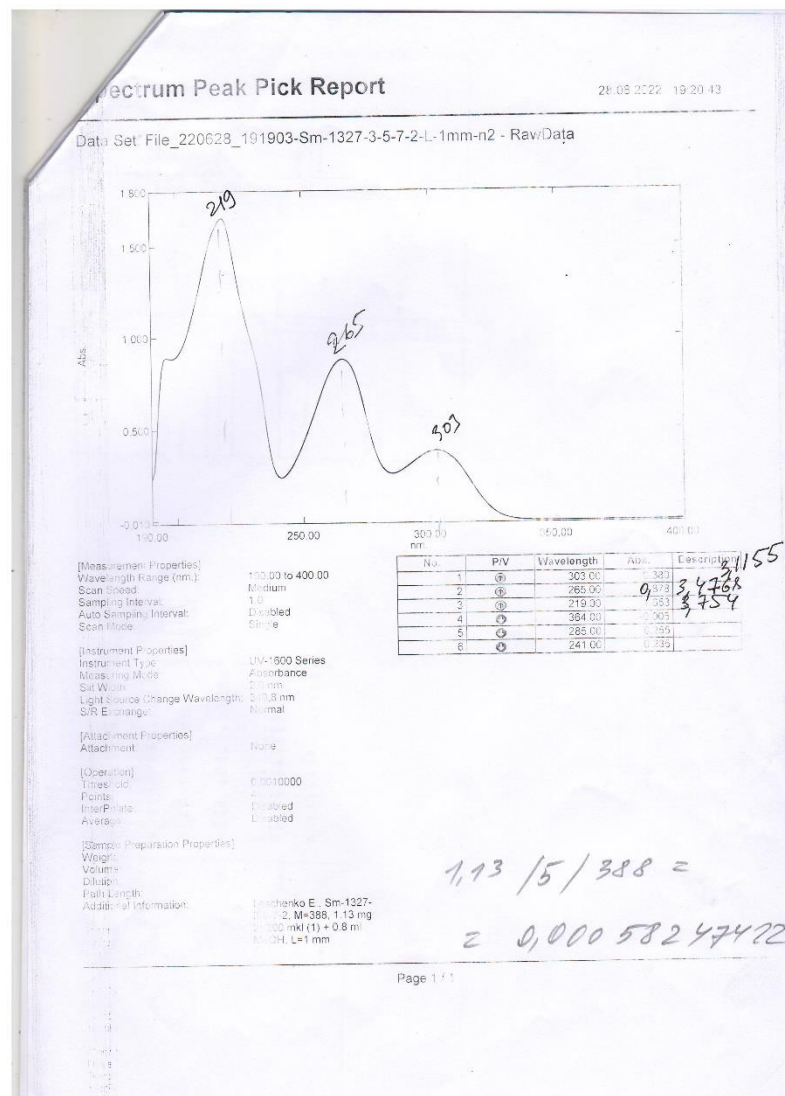

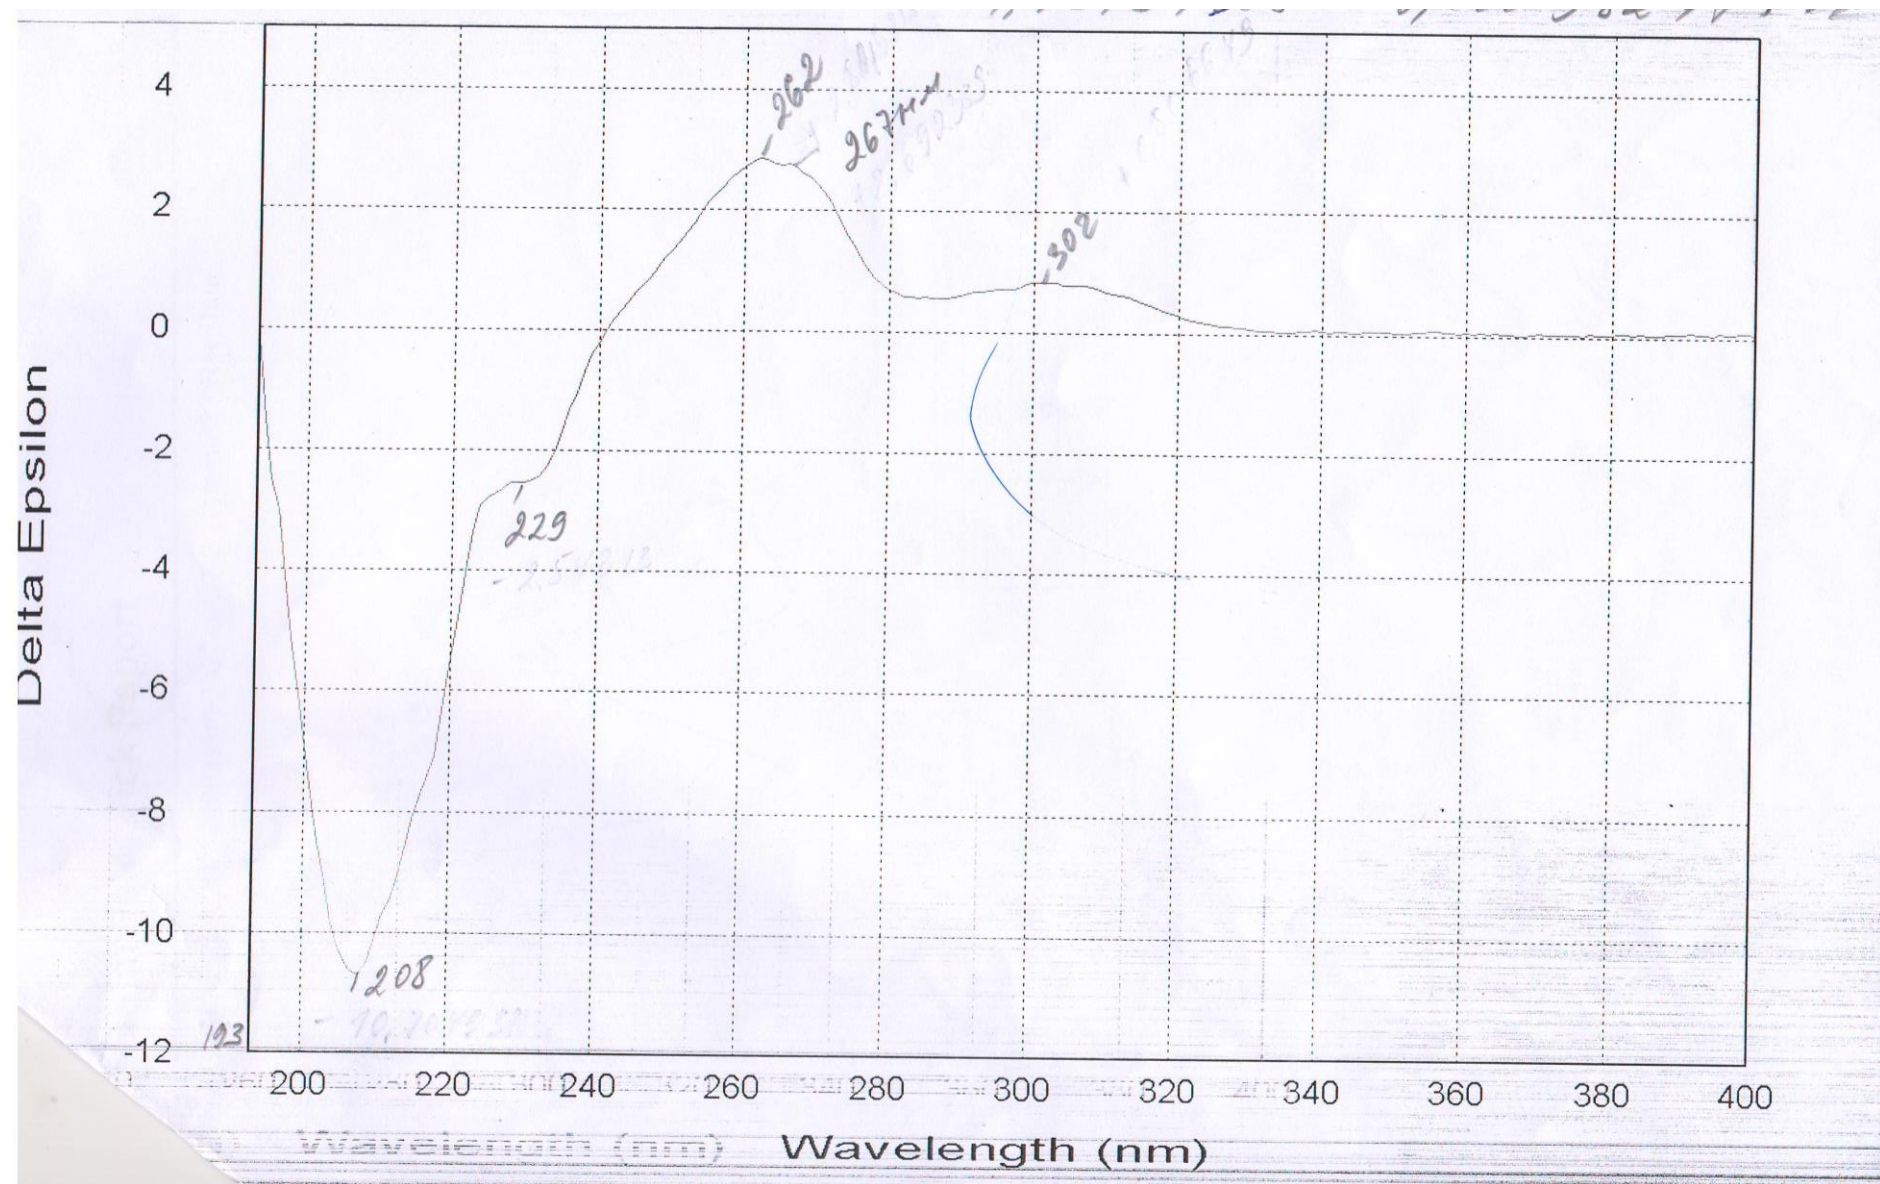

Figure S53. <sup>1</sup>H NMR spectrum for MTPA-2a (S)

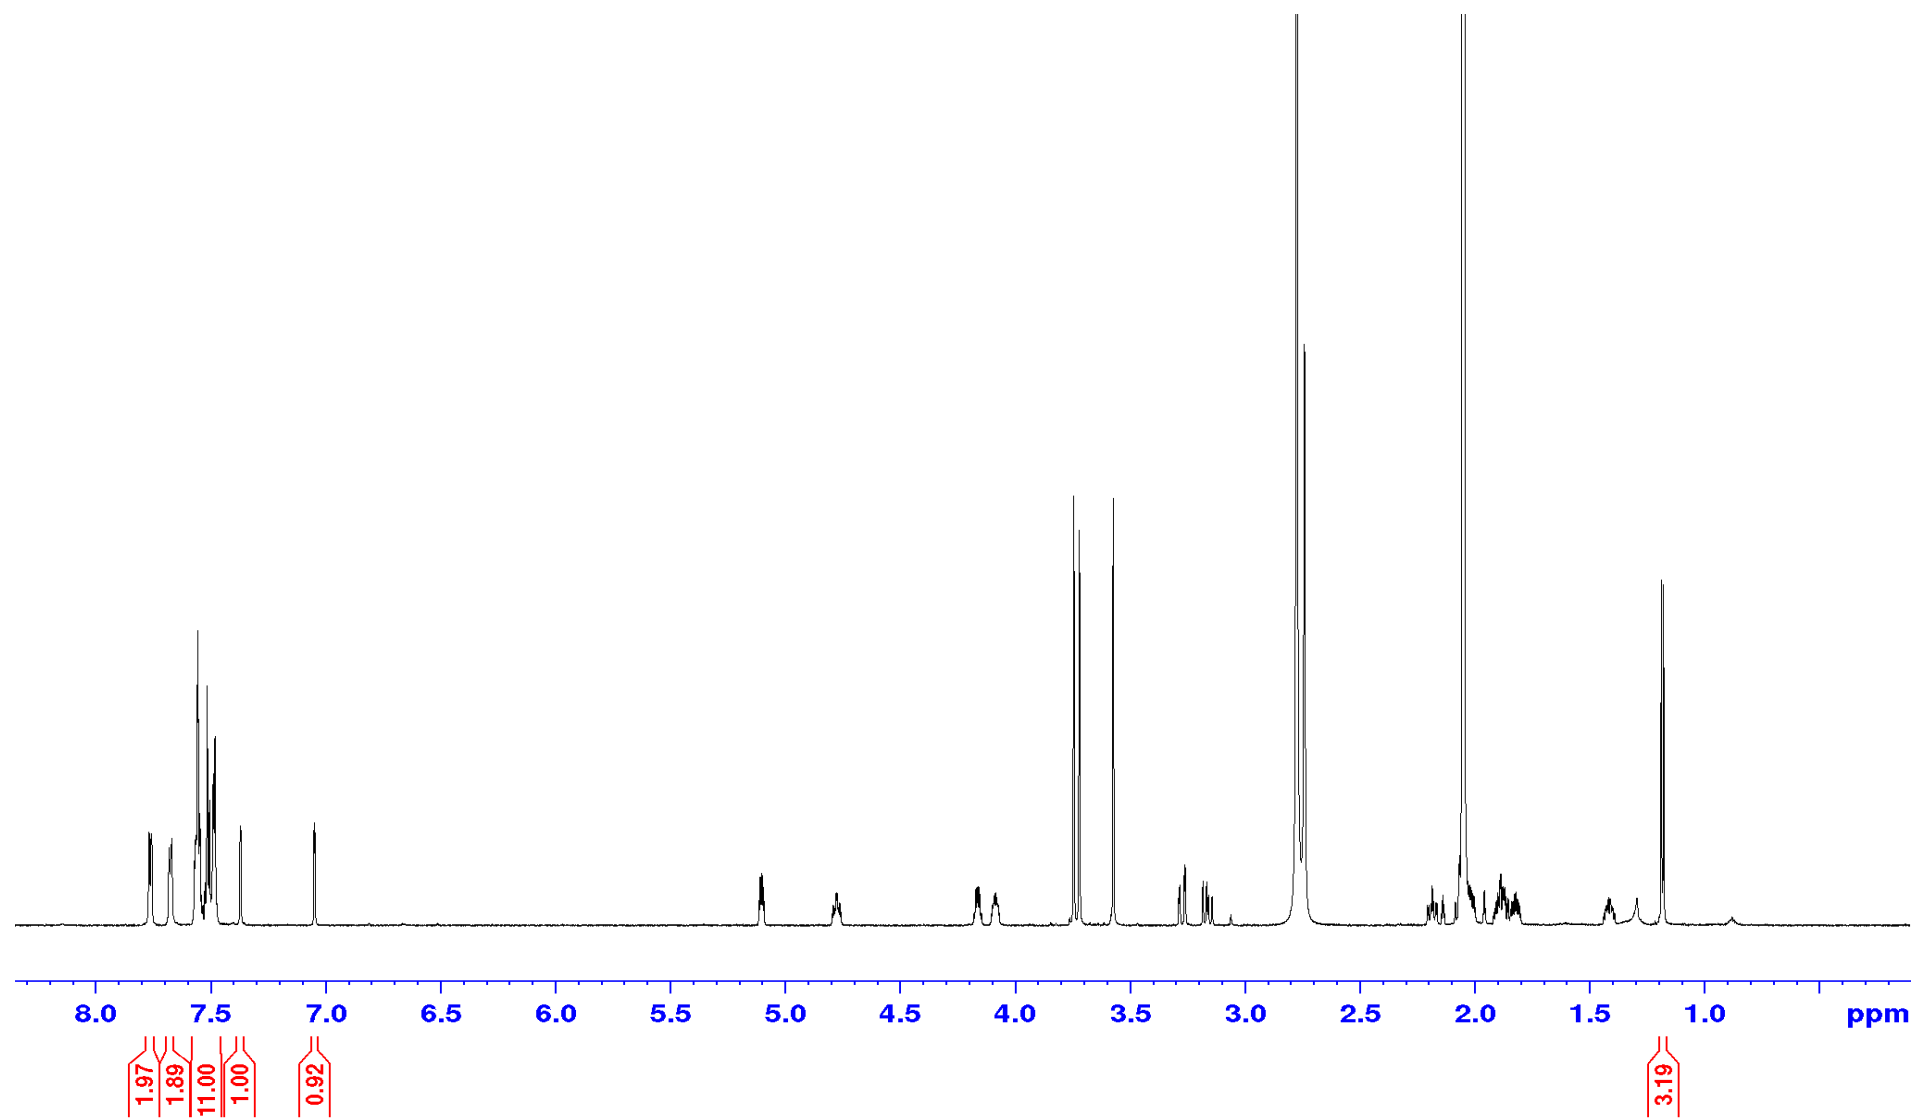

Figure S54.  $^1\text{H}$  NMR spectrum for MTPA-2b (R)

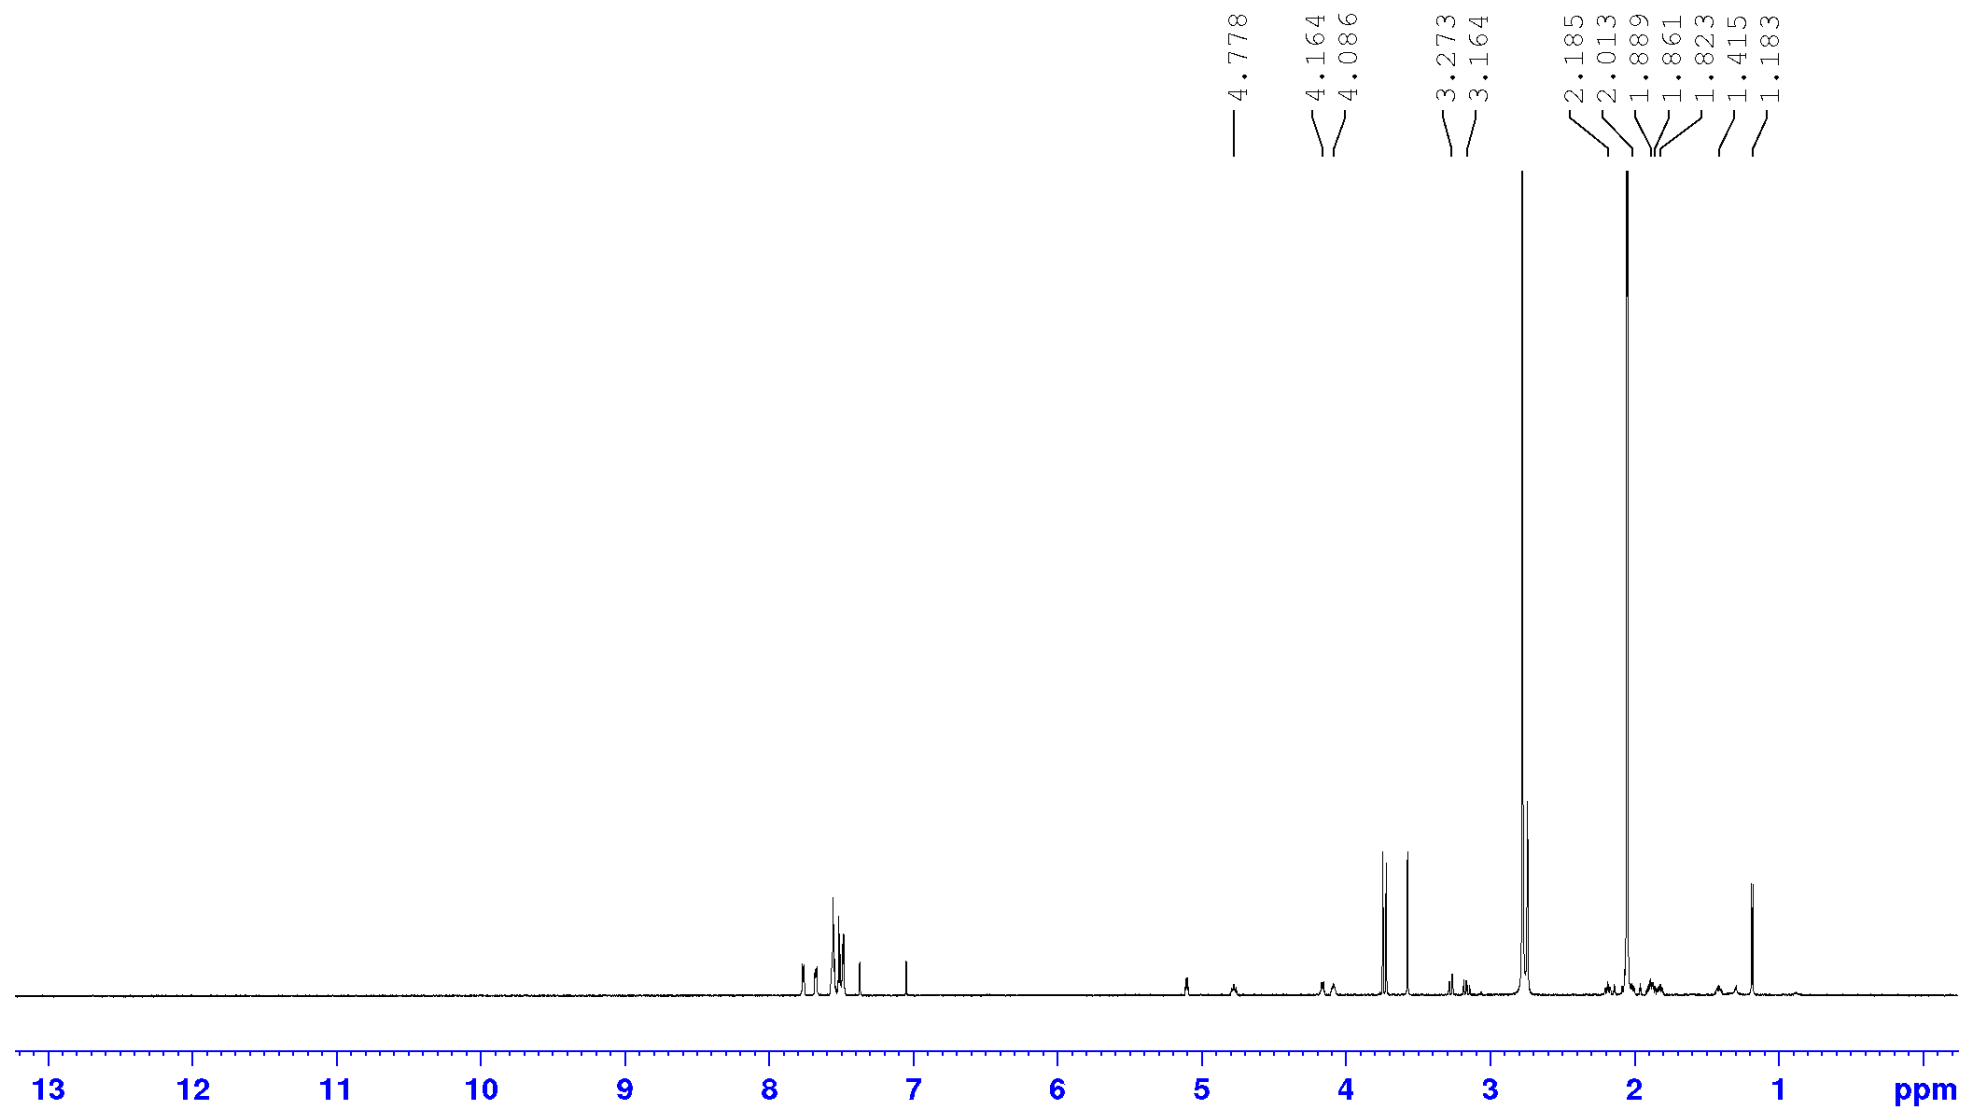

Figure S55. COSY spectrum for MTPA-2b (R)

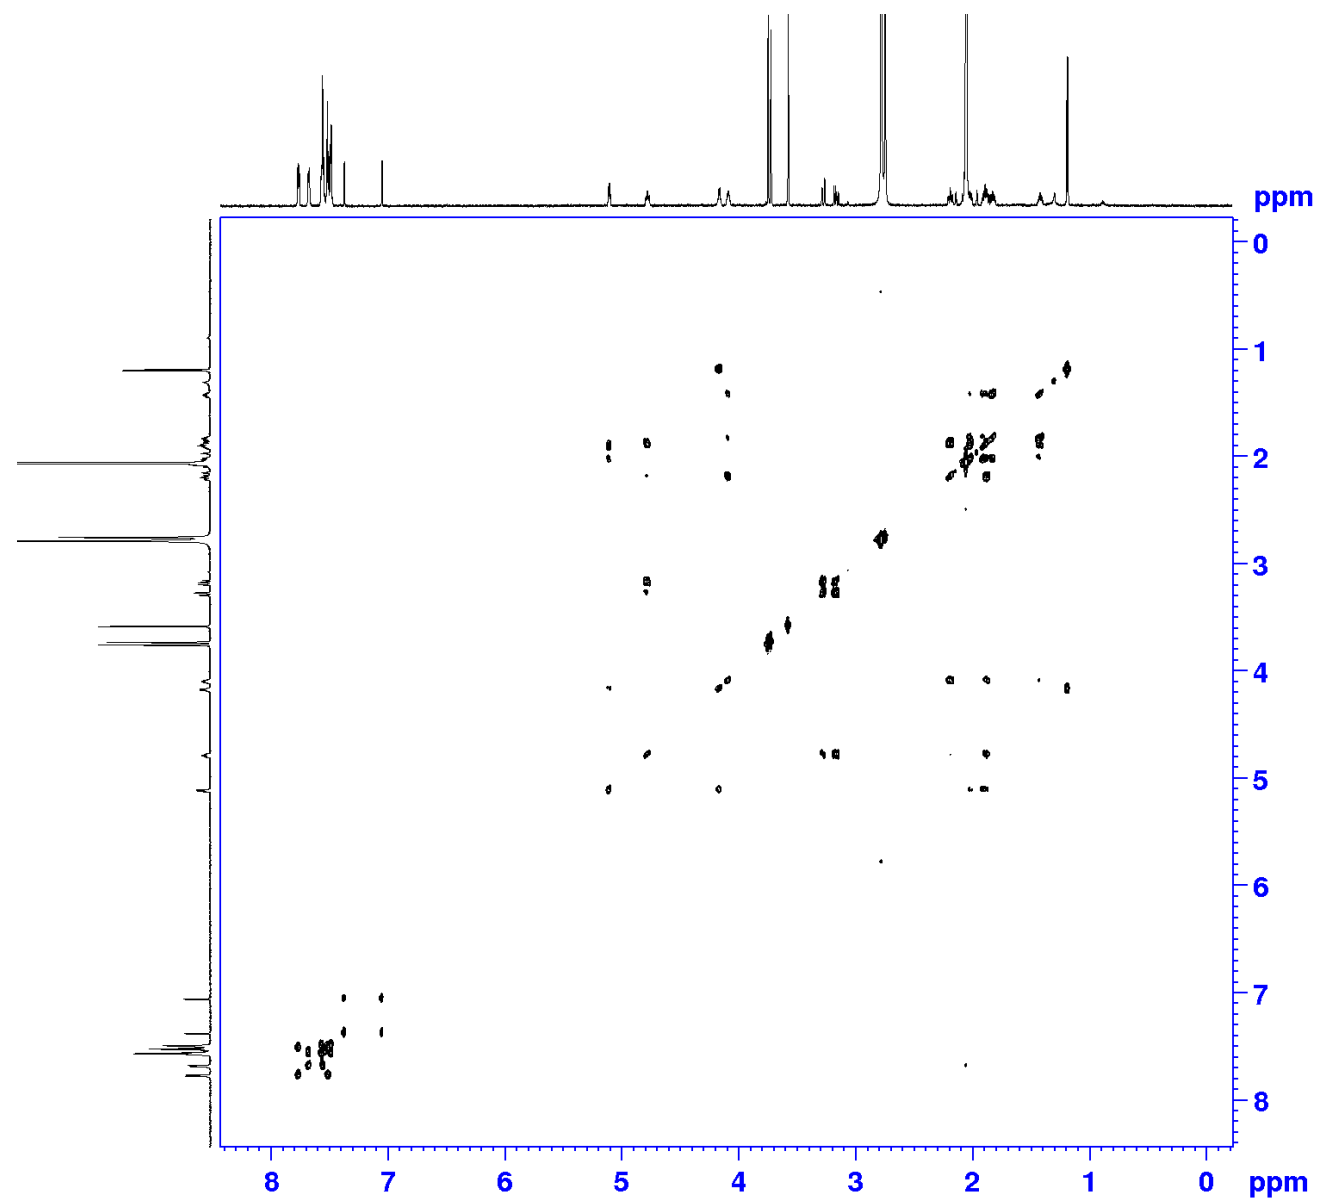



Figure S56. HSQC spectrum for MTPA-2b (R)

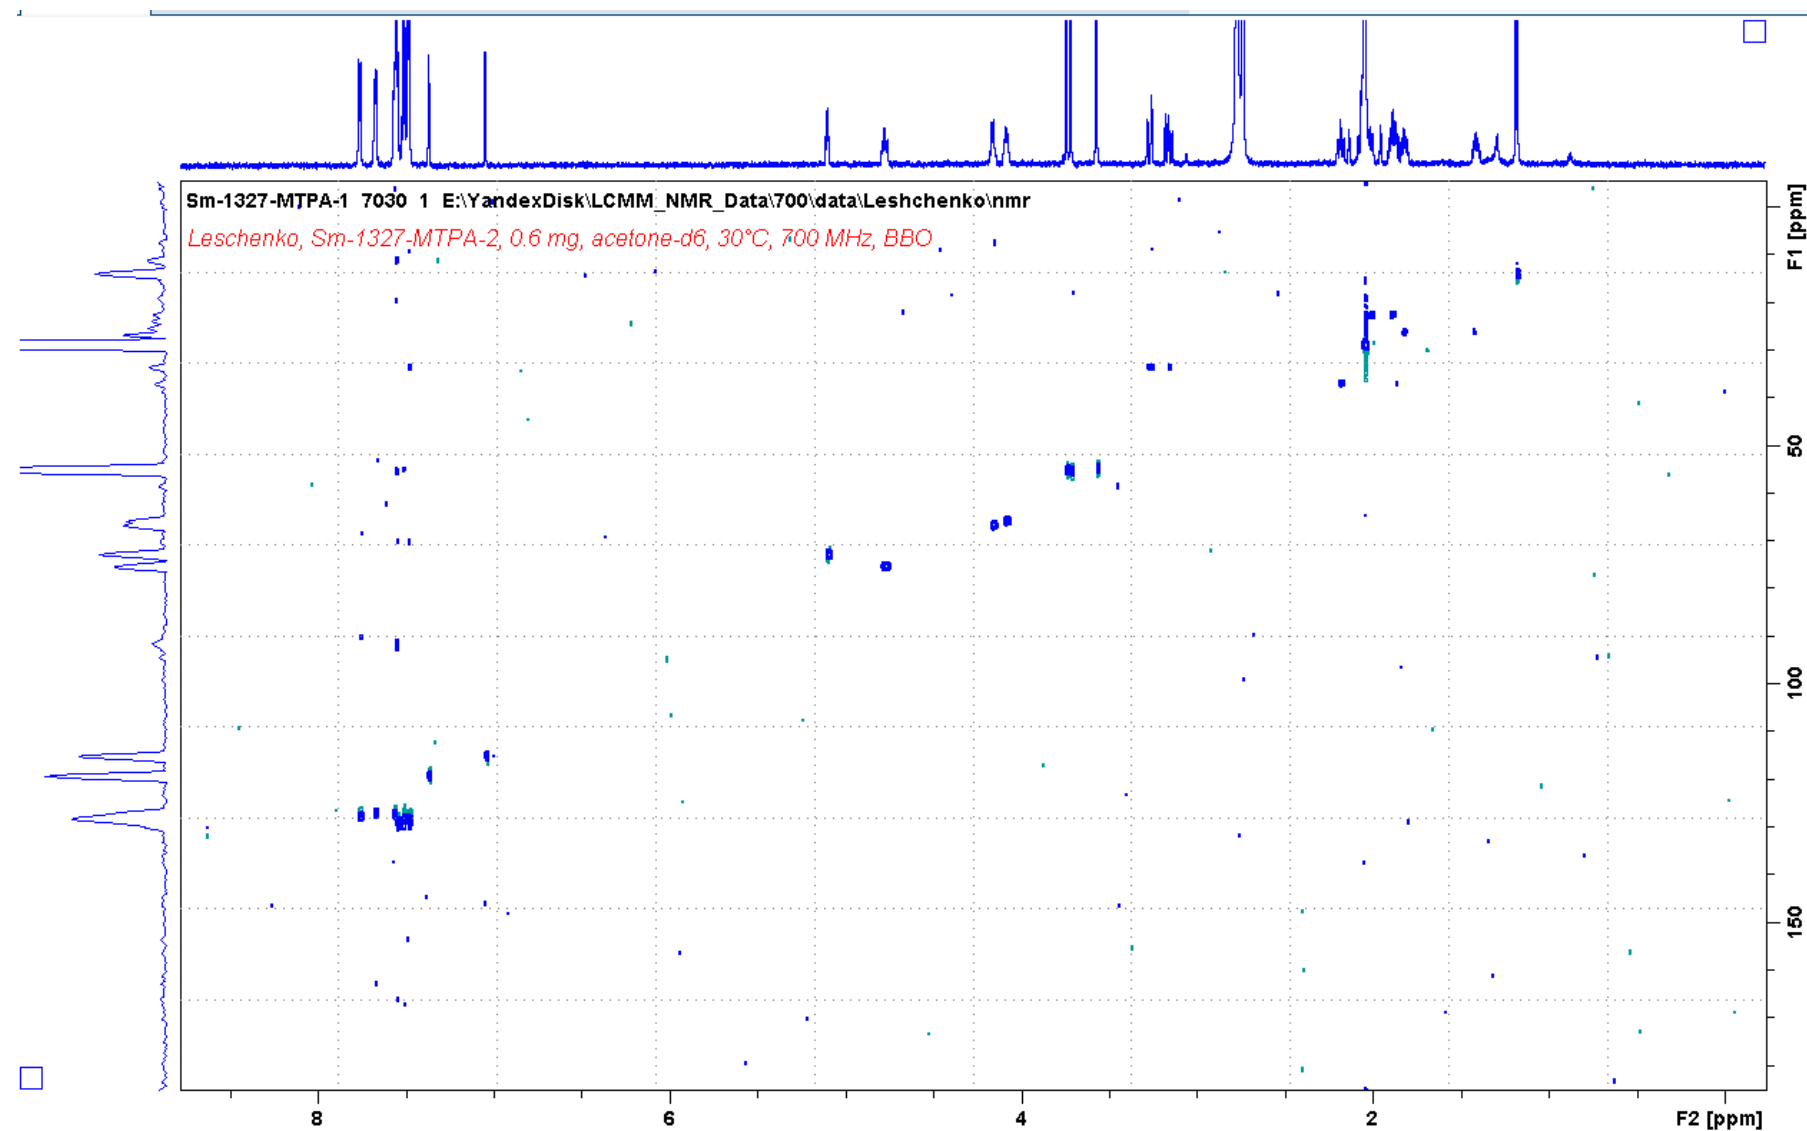

Figure S57. Scheme of isolation compounds 1-6.

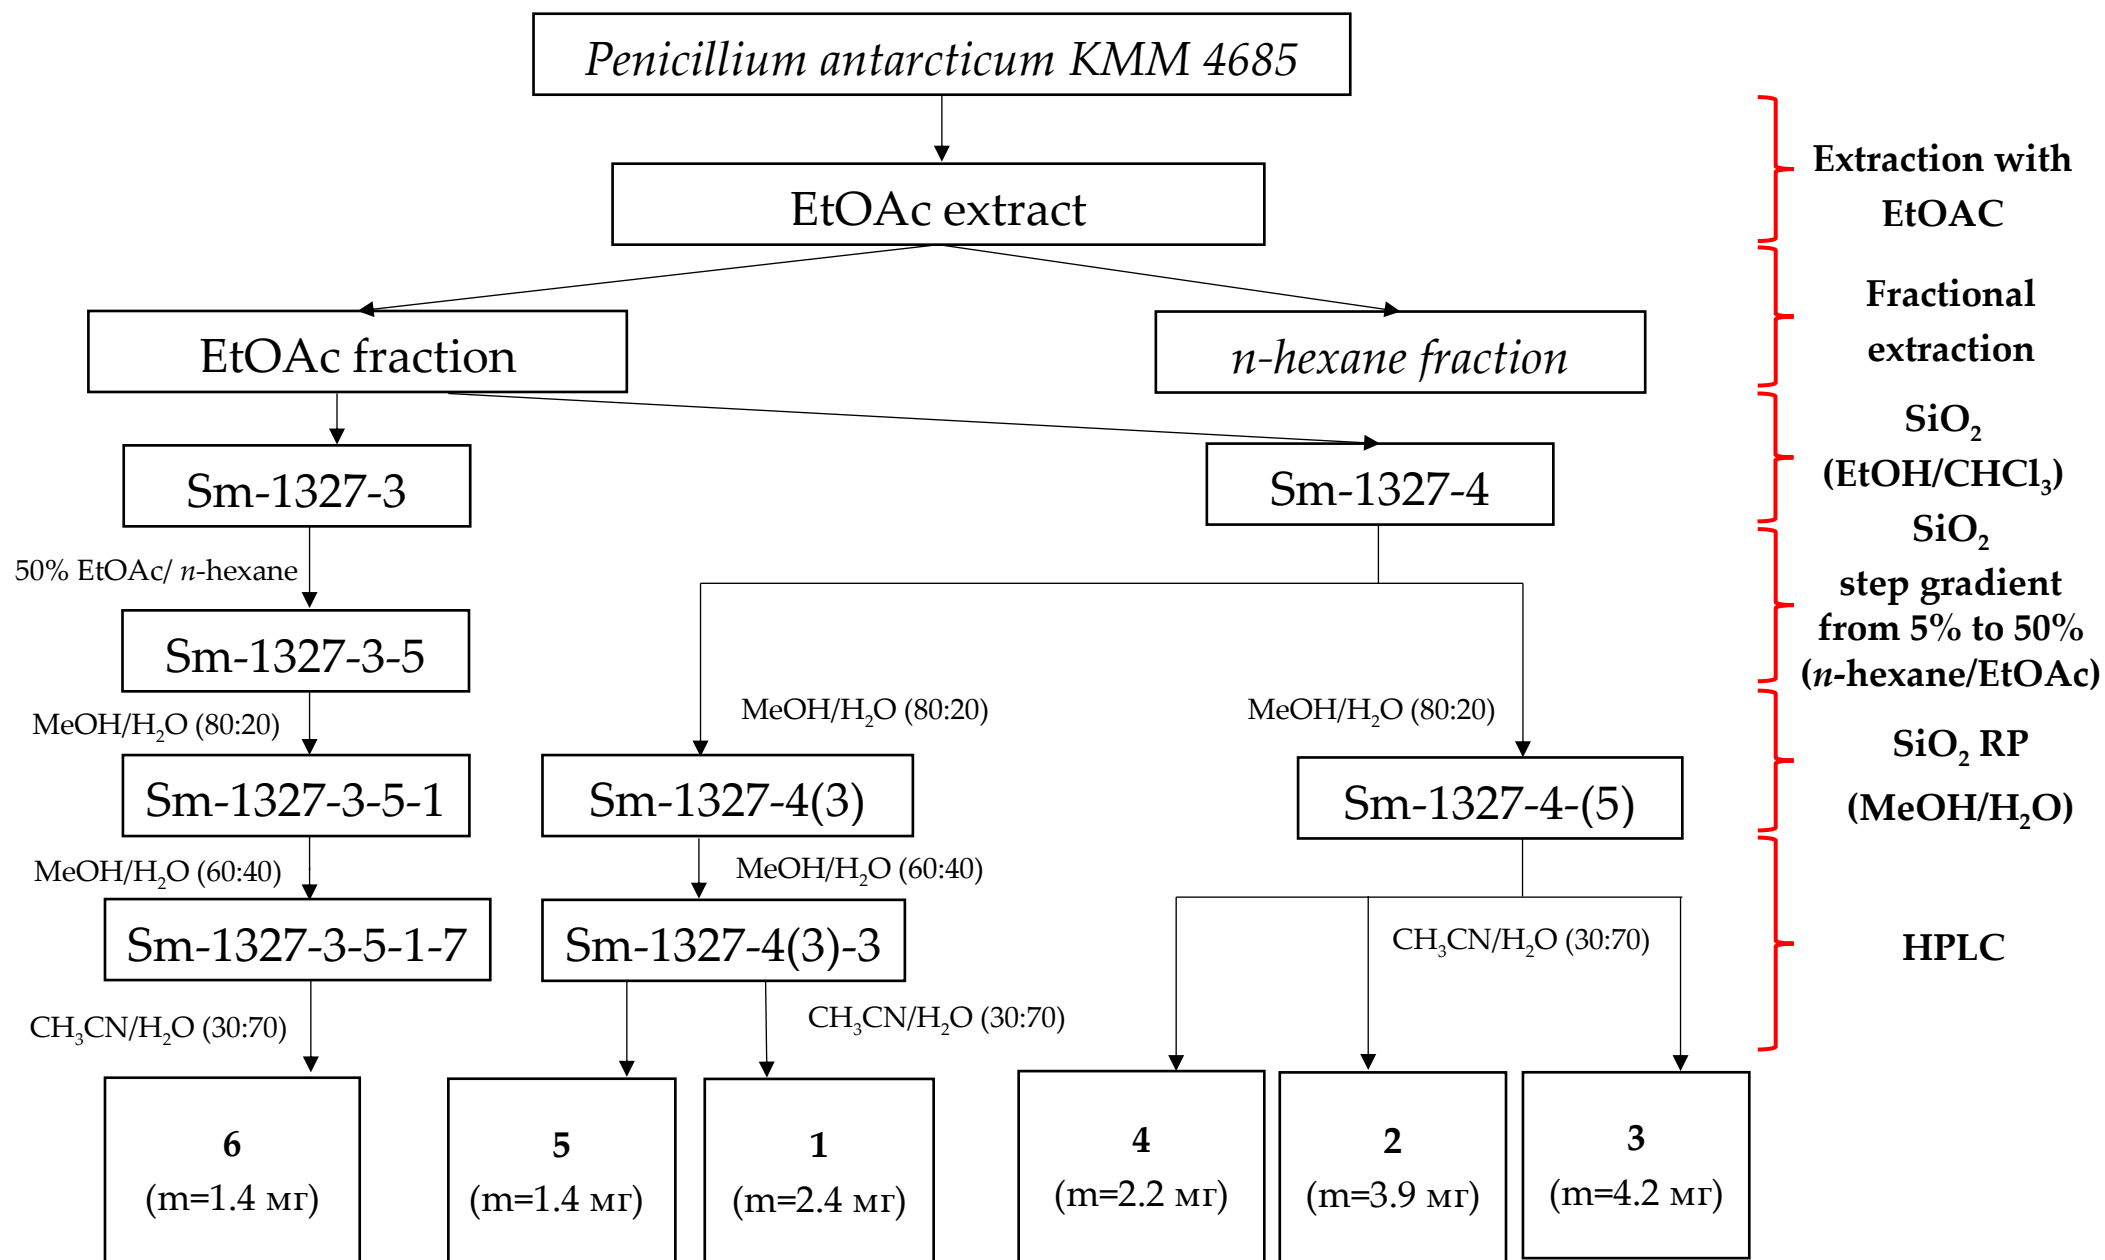

Figure S58. ROESY spectrum for 1

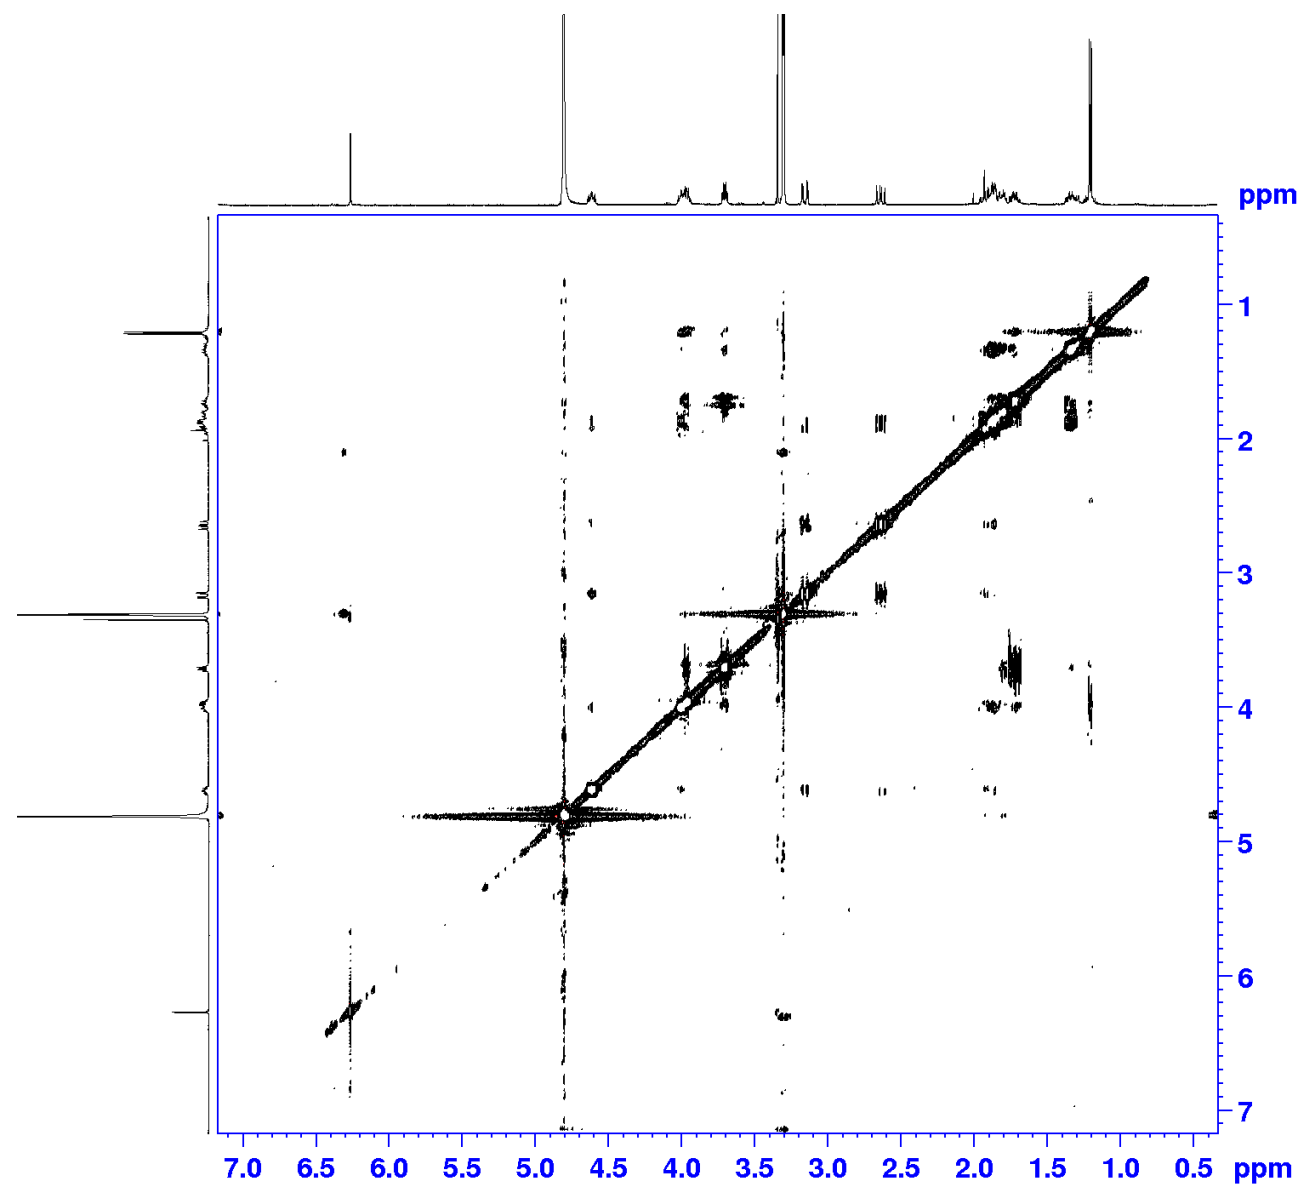

Figure S59. ROESY spectrum for 2

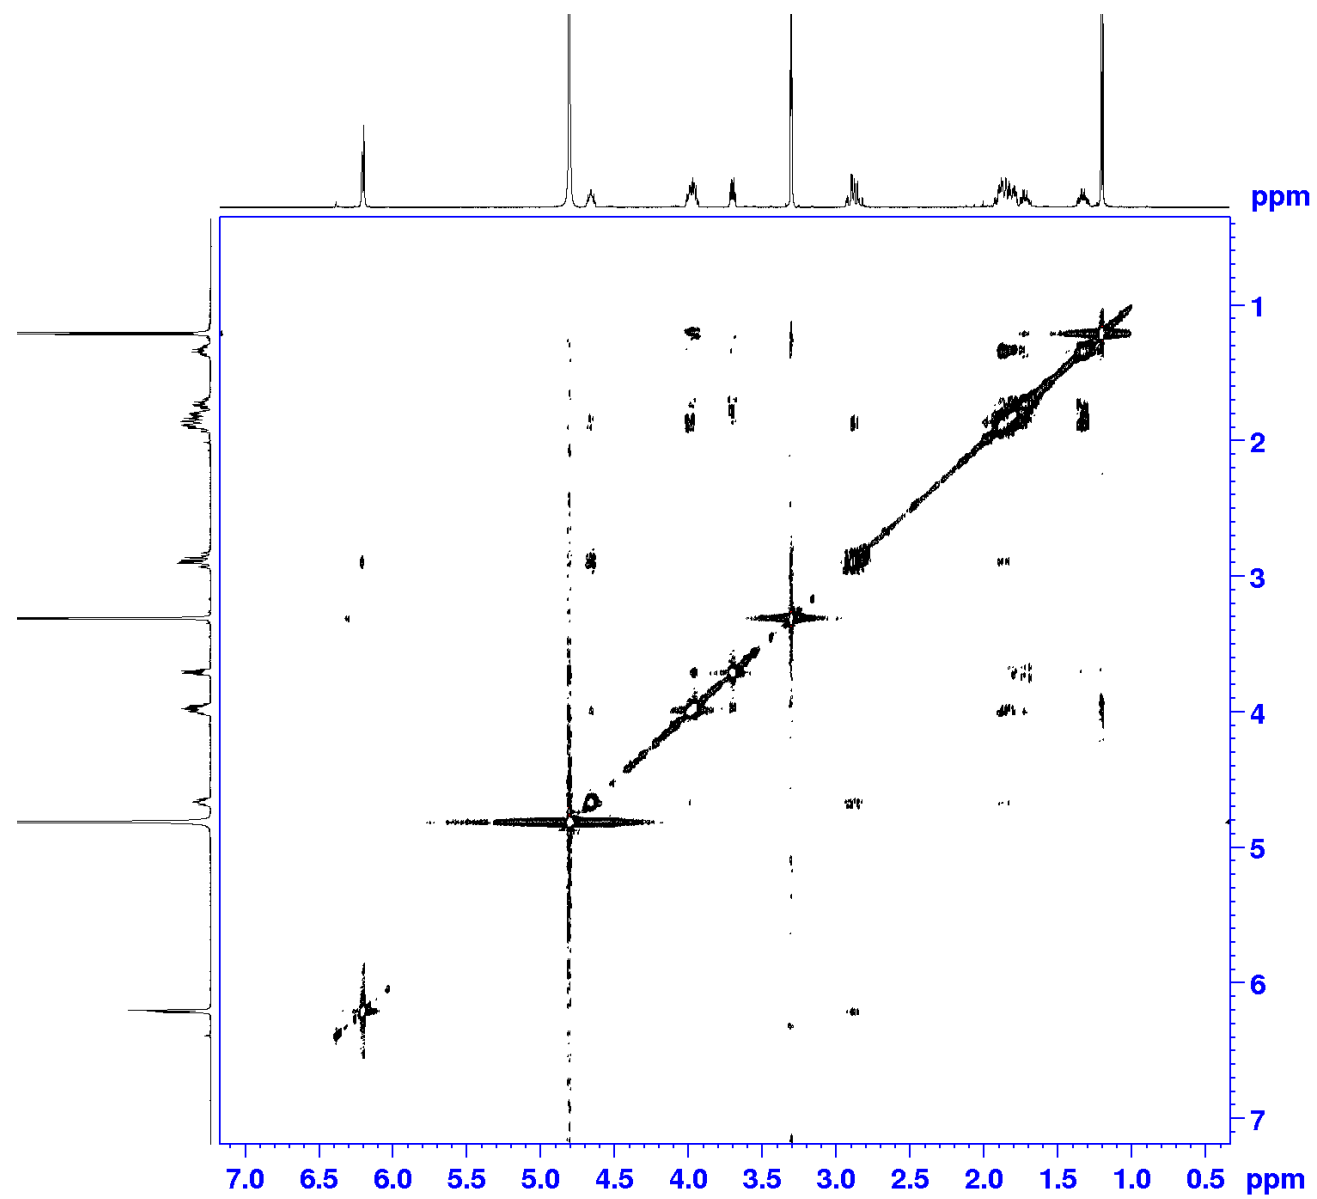

Figure S60. ROESY spectrum for 3

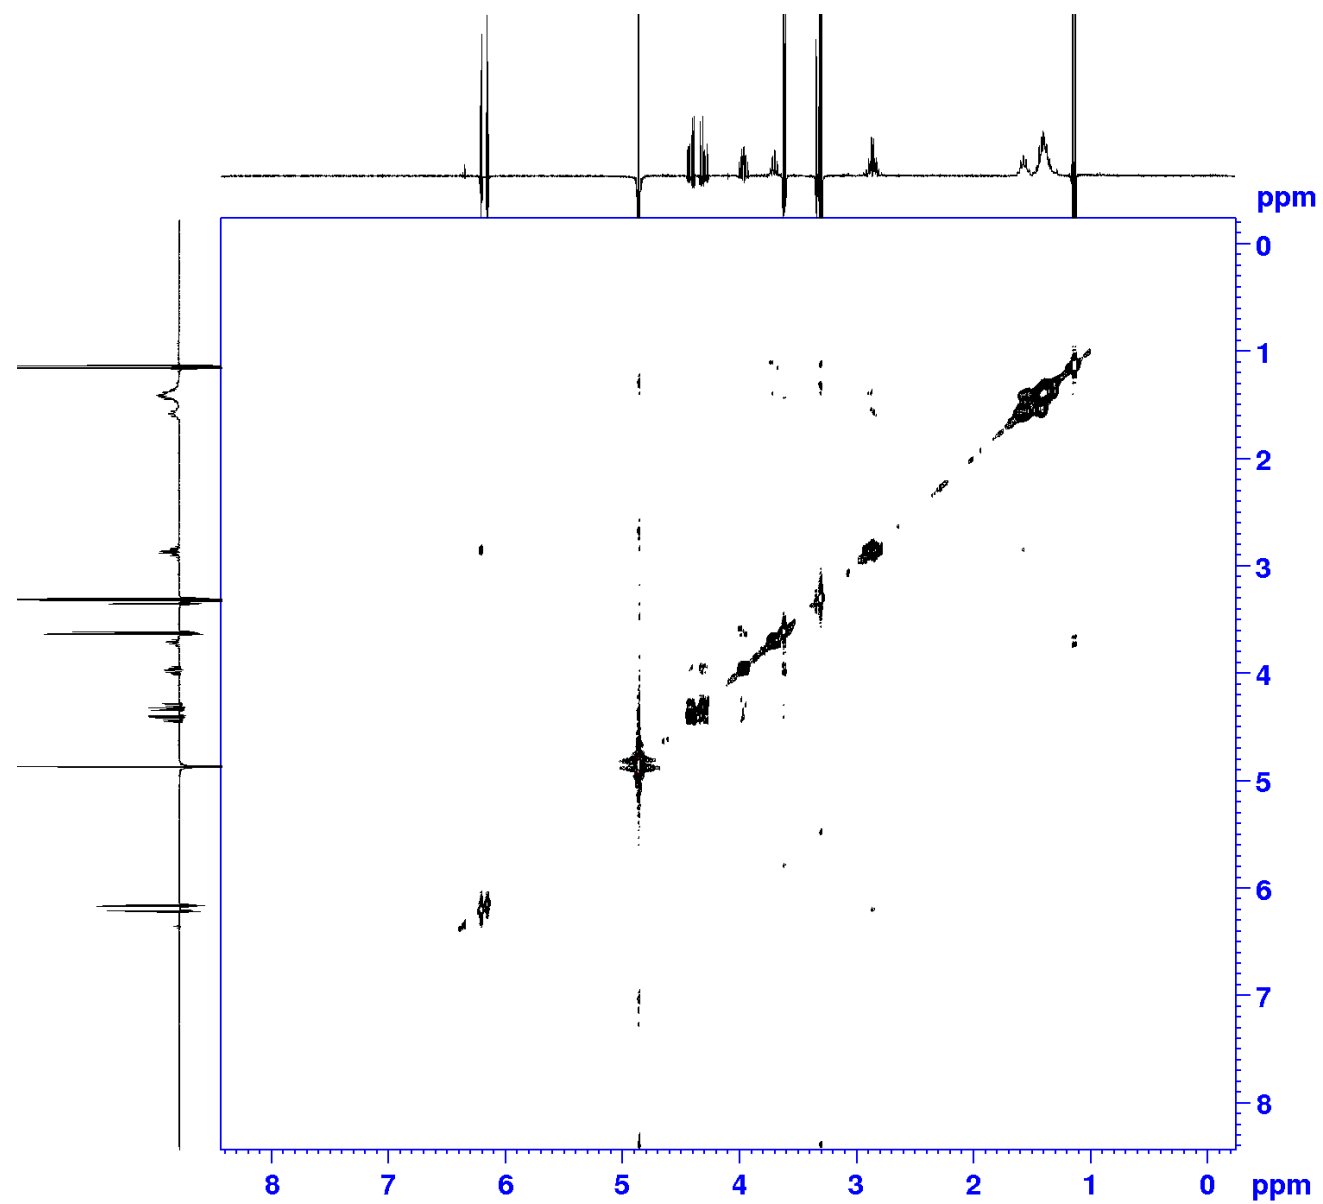

Figure S61. ROESY spectrum for 4

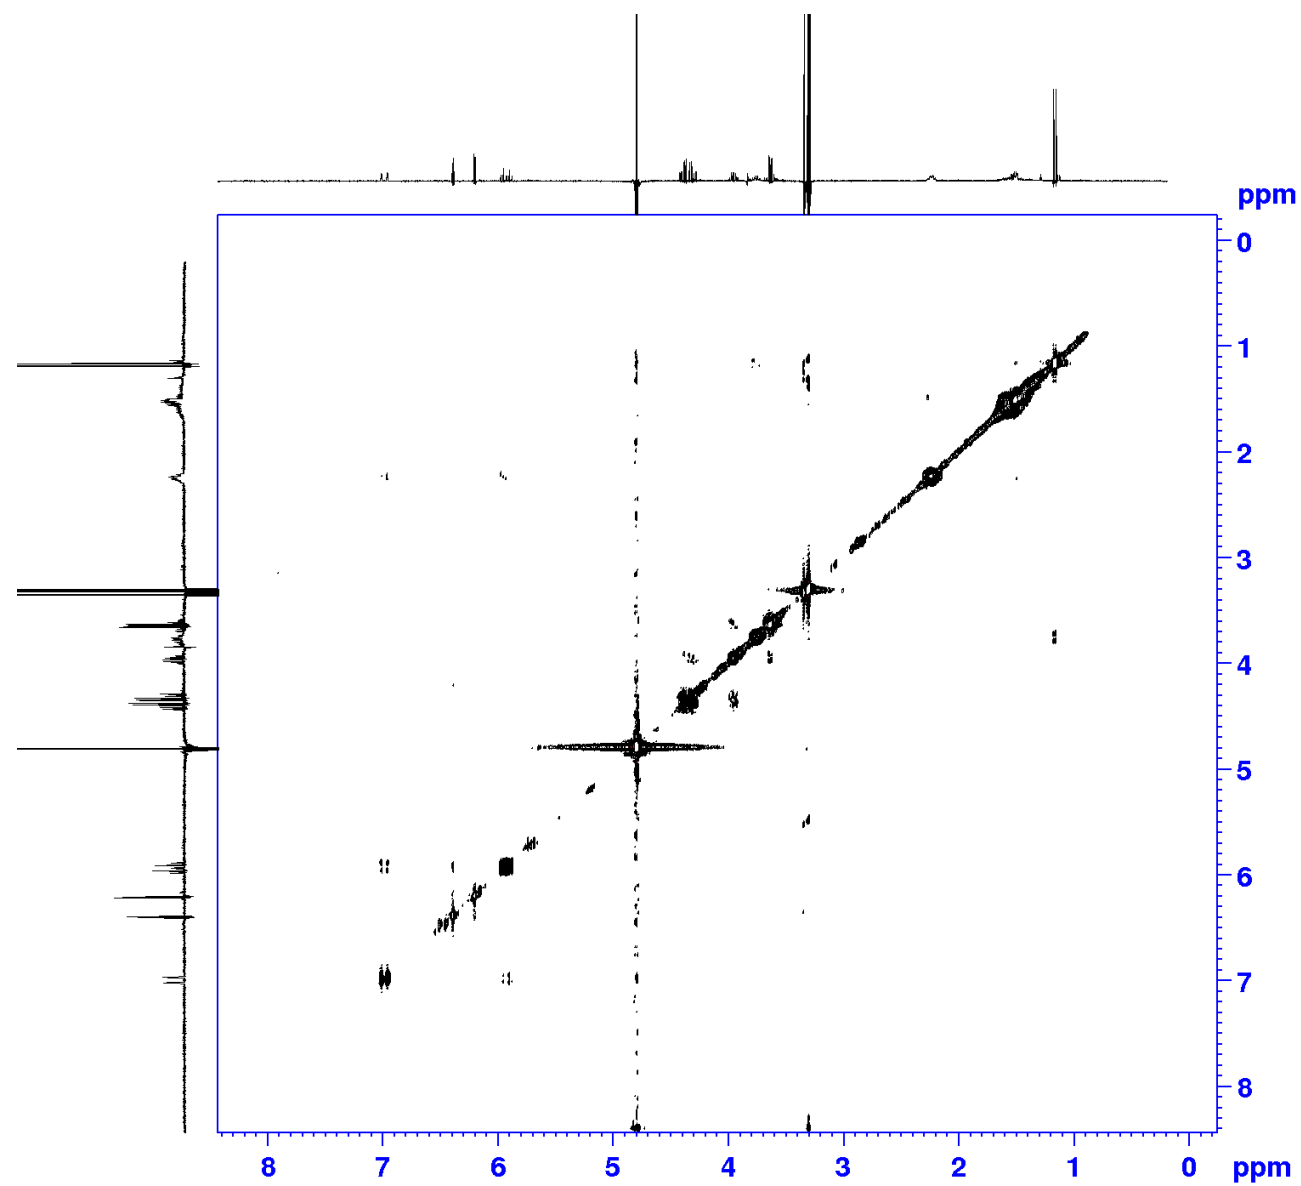

Figure S62. ROESY spectrum for 5

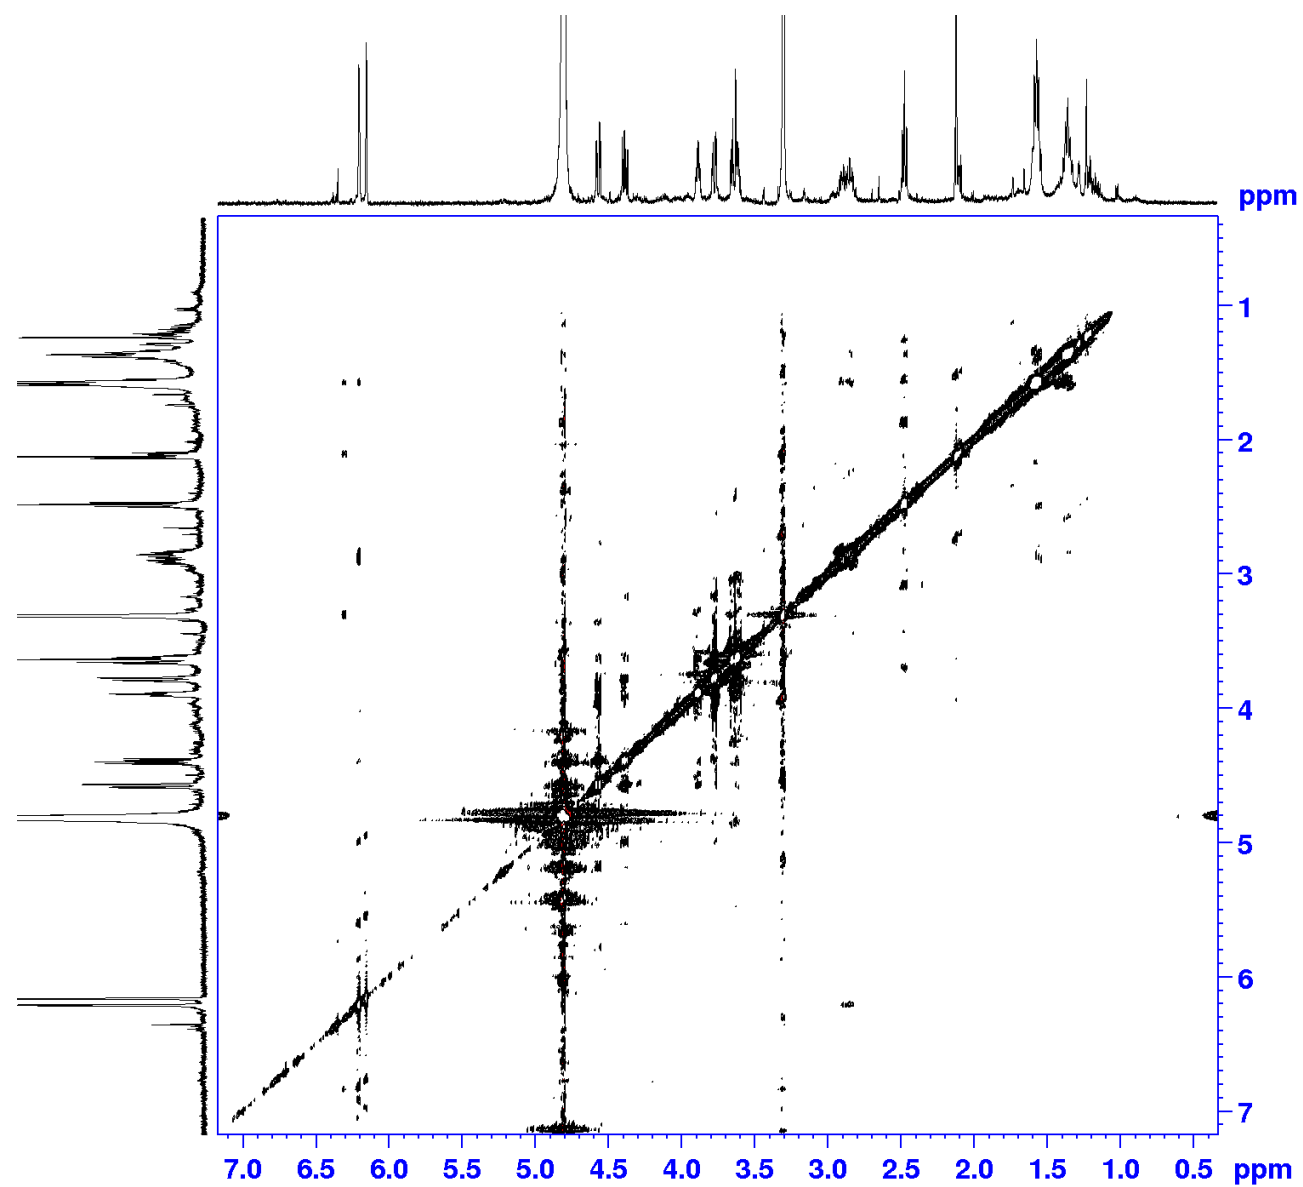

Figure S63. ROESY spectrum for 6

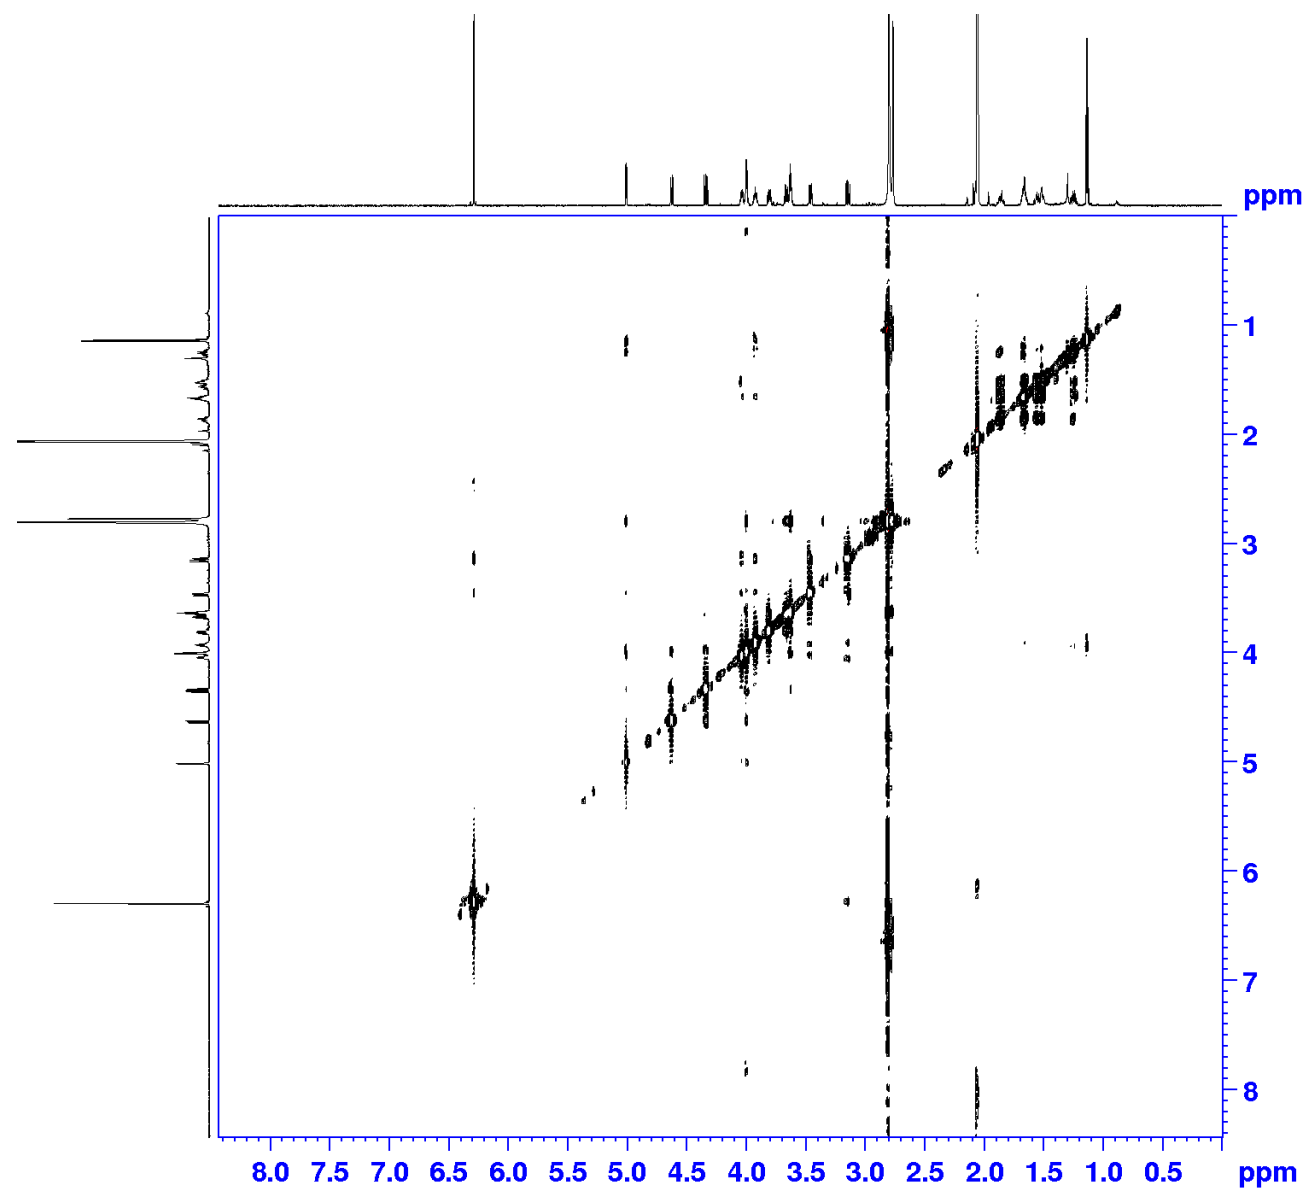



Sm-1327-3-5-7-2 23 1 E:\YandexDisk\LCMM\_NMR\_Data\700\data\Leshchenko\mr

Sm-1327-3-5-7-2. 1.4 mg, Acetone

col : 3.9148 ppm / 2740.3652 Hz Index = 1390

row : 1.859 ppm / 1301.372 Hz Index = 868

Value = -1459

4.0

3.9

3.8

F2 [ppm]

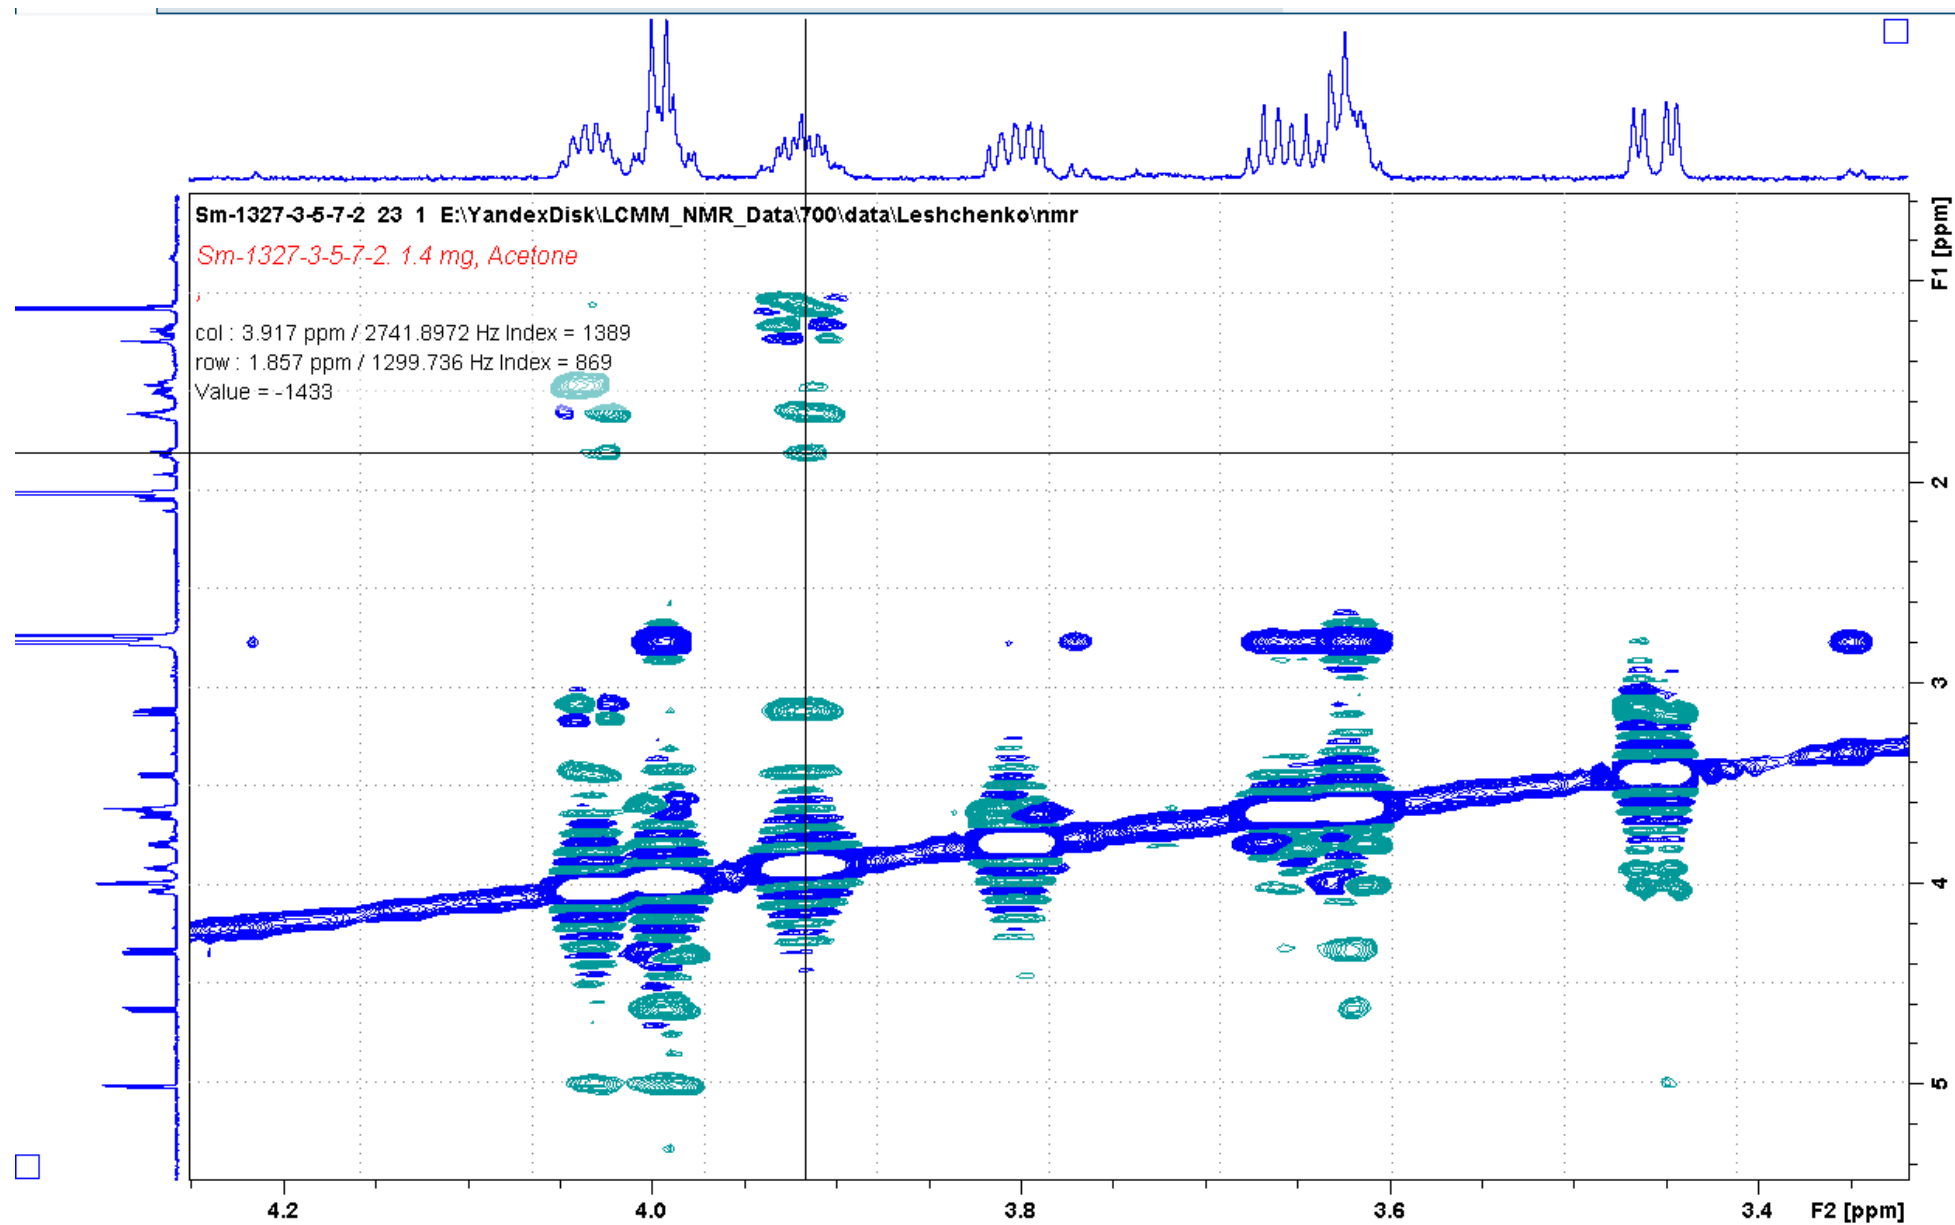

Supplement: s1 [file s1]
